# Supplementary material for: Antimicrobial Terpenoids from South China Sea Soft Coral Lemnalia sp.
Source: MDPI journal article supplement (doi:10.3390/md19060294), 2021-05-22
Supplement: s1 [file s1]

## Supplementary Materials

### Antimicrobial Terpenoids from South China Sea Soft Coral *Lemnalia* sp.

Xia Yan <sup>1</sup>, Han Ouyang <sup>2,\*</sup>, Wei Wang <sup>3</sup>, Jing Liu <sup>1</sup>, Te Li <sup>1</sup>, Bin Wu <sup>4</sup>, Xiaojun Yan <sup>1</sup> and Shan He <sup>1,\*</sup>

<sup>1</sup> Li Dak Sum Yip Yio Chin Kenneth Li Marine Biopharmaceutical Research Center, Department of Marine Pharmacy, College of Food and Pharmaceutical Sciences, Ningbo University, Ningbo 315800, Zhejiang, China; [yanxia@nbu.edu.cn](mailto:yanxia@nbu.edu.cn) (X.Y.); [1397930711@qq.com](mailto:1397930711@qq.com) (J.L.); [telinbu@163.com](mailto:telinbu@163.com) (T.L.); [yanxiaojun@nbu.edu.cn](mailto:yanxiaojun@nbu.edu.cn) (X.Y.)

<sup>2</sup> Institute of Drug Discovery Technology, Ningbo University, Ningbo 315211, Zhejiang, China

<sup>3</sup> Key Laboratory of Marine Drugs, Chinese Ministry of Education; School of Medicine and Pharmacy, Ocean University of China, Qingdao 266003, Shandong, China; [wwwakin@ouc.edu.cn](mailto:wwwakin@ouc.edu.cn) (W.W.)

<sup>4</sup> Ocean College, Zhejiang University, Hangzhou, 310058, Zhejiang, China; [wubin@zju.edu.cn](mailto:wubin@zju.edu.cn) (B.W.)

\* Correspondence: [ouyanghan@nbu.edu.cn](mailto:ouyanghan@nbu.edu.cn) (H.O.); [heshan@nbu.edu.cn](mailto:heshan@nbu.edu.cn) (S.H.); Tel.: +86-574-87604382 (S.H.); +86-574-87609771 (H.O.)

## Content

|                                                                                                                                                        |    |
|--------------------------------------------------------------------------------------------------------------------------------------------------------|----|
| 1. Antibacterial and Antiviral Activity of the Isolated Compounds 1-13 .....                                                                           | 3  |
| 2. Regression analysis of experimental vs calculated $^{13}\text{C}$ NMR chemical shifts of compound 1 and 2 .....                                     | 3  |
| 3. Calculated ECD spectrum of (2 <i>S</i> ,4 <i>S</i> ,5 <i>S</i> ,6 <i>R</i> ,7 <i>S</i> )-4 and experimental ECD spectrum of 4 .....                 | 4  |
| 4. Calculated ECD spectrum of (1 <i>R</i> ,5 <i>S</i> ,6 <i>R</i> ,7 <i>R</i> ,10 <i>R</i> ,11 <i>S</i> )-10 and experimental ECD spectrum of 10 ..... | 5  |
| 5. Spectroscopic data for lineolemnene E (1) .....                                                                                                     | 5  |
| 6. Spectroscopic data for lineolemnene F (2) .....                                                                                                     | 9  |
| 7. Spectroscopic data for lineolemnene G (3) .....                                                                                                     | 13 |
| 8. Spectroscopic data for 2-acetoxy-aristolane (4) .....                                                                                               | 18 |
| 9. Spectroscopic data for biofloranate A (5) .....                                                                                                     | 23 |
| 10. Spectroscopic data for biofloranate B (6) .....                                                                                                    | 28 |
| 11. Spectroscopic data for biofloranate C (7) .....                                                                                                    | 31 |
| 12. Spectroscopic data for biofloranate D (8) .....                                                                                                    | 35 |
| 13. Spectroscopic data for euplexaurene D (9) .....                                                                                                    | 39 |
| 14. Spectroscopic data for cneorubin K (10) .....                                                                                                      | 44 |
| 15. $^1\text{H}$ -NMR for ( <i>S</i> )-MTPA and ( <i>R</i> )-MTPA esters of compound 5 in pyridine- <i>d</i> <sub>5</sub> ..                           | 49 |
| 16. Spectroscopic data for known compound cneorubin X (11) .....                                                                                       | 50 |
| 17. Spectroscopic data for known compound obscuronatin (12) .....                                                                                      | 51 |
| 18. Spectroscopic data for known compound dictyotin B (13) .....                                                                                       | 52 |

## 1. Antibacterial and Antiviral Activity of the Isolated Compounds 1-13

**Table S1.** Antibacterial and antiviral activity of the isolated compounds **1-13**.

| No.          | MIC (against<br><i>Staphylococcus</i><br><i>aureus</i> , µg/mL) | MIC (against<br><i>Bacillus subtilis</i> ,<br>µg/mL) | Inhibition rate at<br>30 µM (against<br>H1N1) | Inhibition rate at<br>50 µM (against<br>HSV-1) |
|--------------|-----------------------------------------------------------------|------------------------------------------------------|-----------------------------------------------|------------------------------------------------|
| <b>1</b>     | > 128                                                           | > 128                                                | 84.50%                                        | 0.60%                                          |
| <b>2</b>     | > 128                                                           | > 128                                                | 100.00%                                       | 5.10%                                          |
| <b>3</b>     | > 128                                                           | > 128                                                | 77.60%                                        | 32.10%                                         |
| <b>4</b>     | > 128                                                           | > 128                                                | 88.50%                                        | 0.00%                                          |
| <b>5</b>     | 8                                                               | 8                                                    | 2.20%                                         | 0.00%                                          |
| <b>6</b>     | 4                                                               | 16                                                   | 5.40%                                         | 0.00%                                          |
| <b>7</b>     | 4                                                               | 16                                                   | 21.70%                                        | 0.00%                                          |
| <b>8</b>     | 16                                                              | 8                                                    | 15.60%                                        | 0.00%                                          |
| <b>9</b>     | > 128                                                           | > 128                                                | 2.20%                                         | 13.70%                                         |
| <b>10</b>    | 16                                                              | 8                                                    | 0.00%                                         | 0.00%                                          |
| <b>11</b>    | > 128                                                           | 16                                                   | 49.40%                                        | 50%                                            |
| <b>12</b>    | > 128                                                           | 16                                                   | 2.70%                                         | 0.00%                                          |
| <b>13</b>    | > 128                                                           | 8                                                    | 1.40%                                         | 0.00%                                          |
| Penicillin G | 1                                                               | 1                                                    | —                                             | —                                              |
| Acyclovir    | —                                                               | —                                                    | 97.00%                                        | 93.70%                                         |

## 2. Regression analysis of experimental vs calculated <sup>13</sup>C NMR chemical shifts of compound 1 and 2

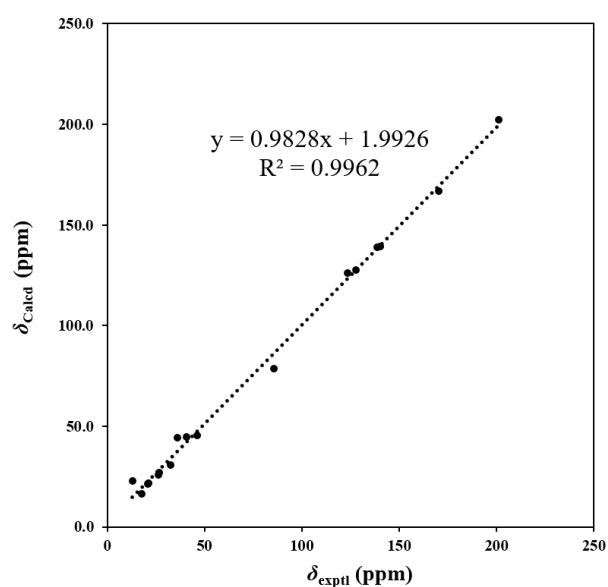

**Figure S1.** Regression analysis of experimental vs calculated  $^{13}\text{C}$  NMR chemical shifts of (4*S*,5*S*,8*R*)-**1** at the GIAO/mPW1PW91/6-31G (d, p) level using DP4+ method. The linear fitting is shown as dashed line

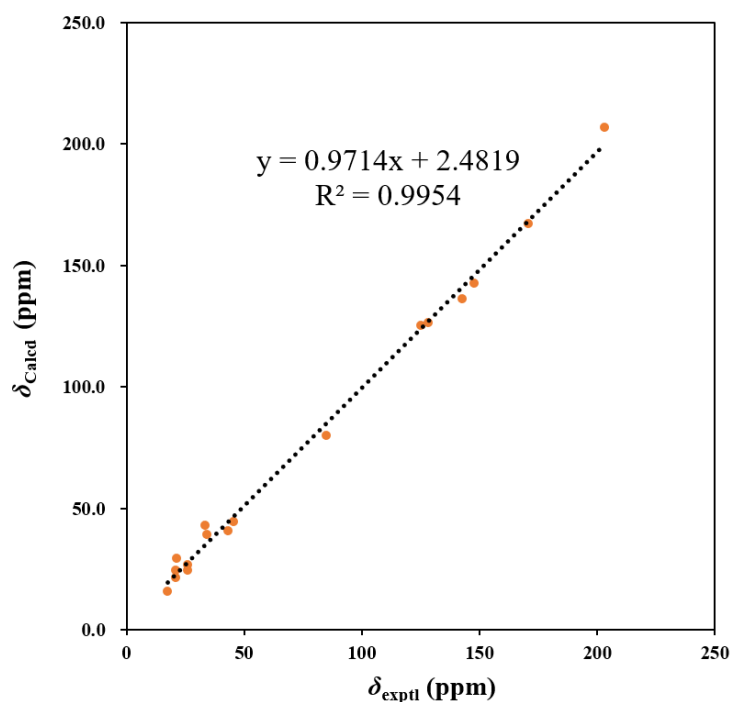

**Figure S2.** Regression analysis of experimental vs calculated  $^{13}\text{C}$  NMR chemical shifts of (4*S*,5*S*,8*S*)-**2** at the GIAO/mPW1PW91/6-31G (d, p) level using DP4+ method. The linear fitting is shown as dashed line

### 3. Calculated ECD spectrum of (2*S*,4*S*,5*S*,6*R*,7*S*)-**4** and experimental ECD spectrum of **4**

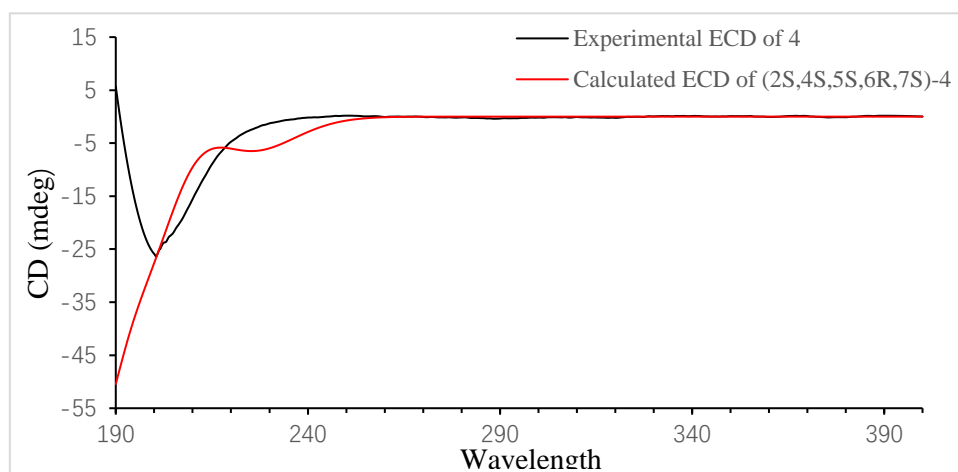

**Figure S3.** Calculated ECD spectrum of (2*S*,4*S*,5*S*,6*R*,7*S*)-**4** and experimental ECD spectrum of **4**

#### 4. Calculated ECD spectrum of (1*R*,5*S*,6*R*,7*R*,10*R*,11*S*)-**10** and experimental ECD spectrum of **10**

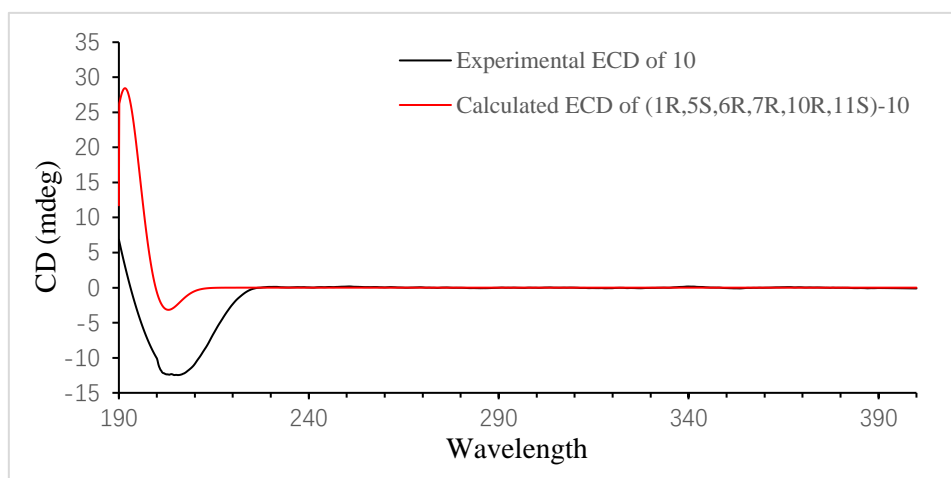

**Figure S4.** Calculated ECD spectrum of (1*R*,5*S*,6*R*,7*R*,10*R*,11*S*)-**10** and experimental ECD spectrum of **10**

#### 5. Spectroscopic data for lineolemnene E (**1**)

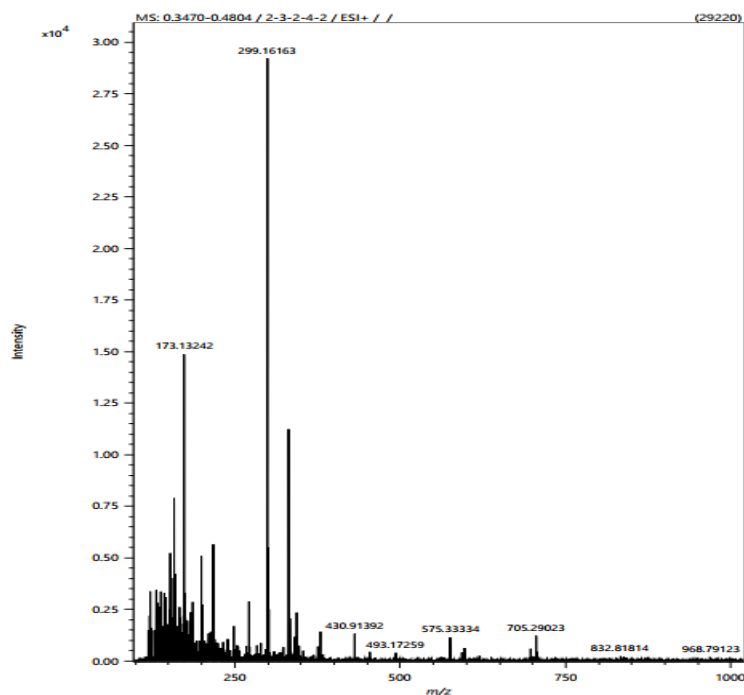

**Figure S5.** HRESIMS spectrum of lineolemnene E (**1**)

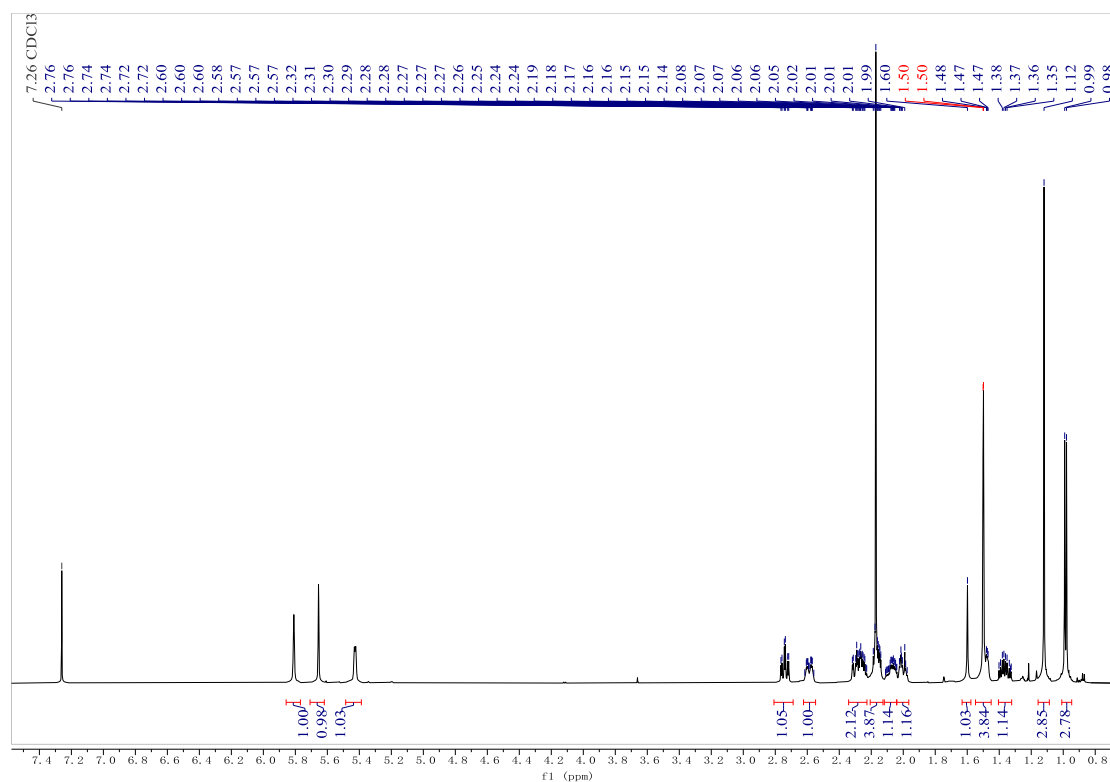

**Figure S6.**  $^1\text{H}$ -NMR spectrum of lineolemnene E (**1**) in  $\text{CDCl}_3$

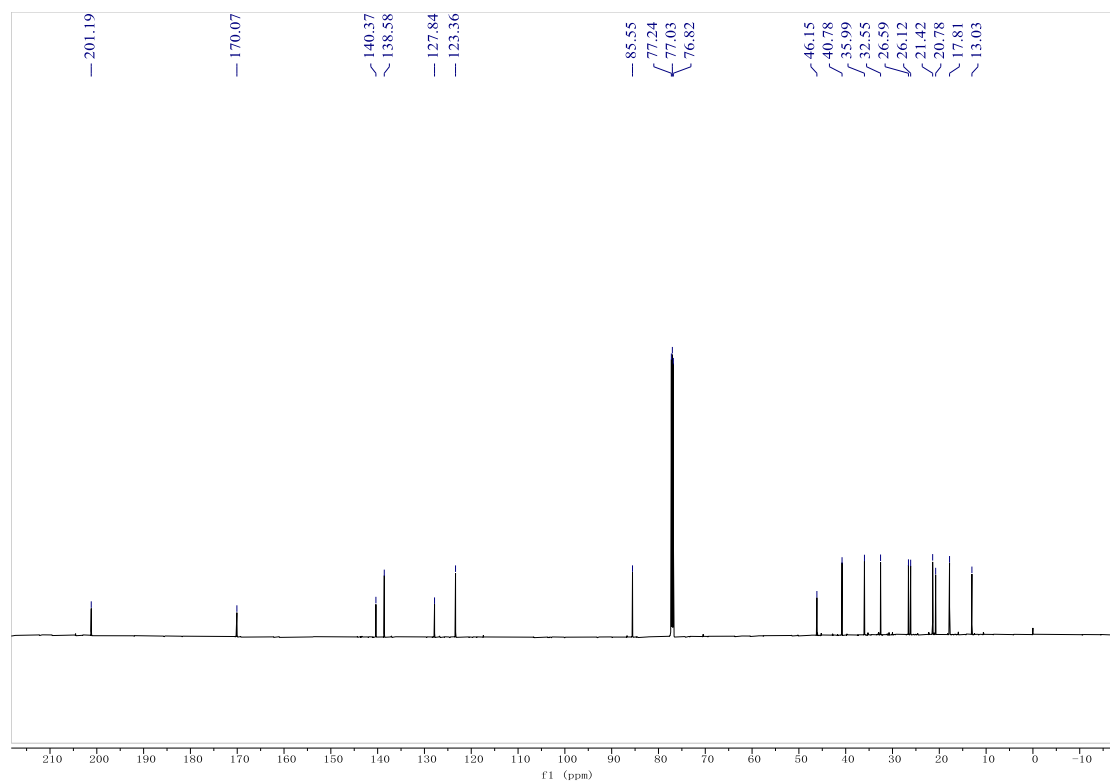

**Figure S7.**  $^{13}\text{C}$ -NMR spectrum of lineolemnene E (**1**) in  $\text{CDCl}_3$

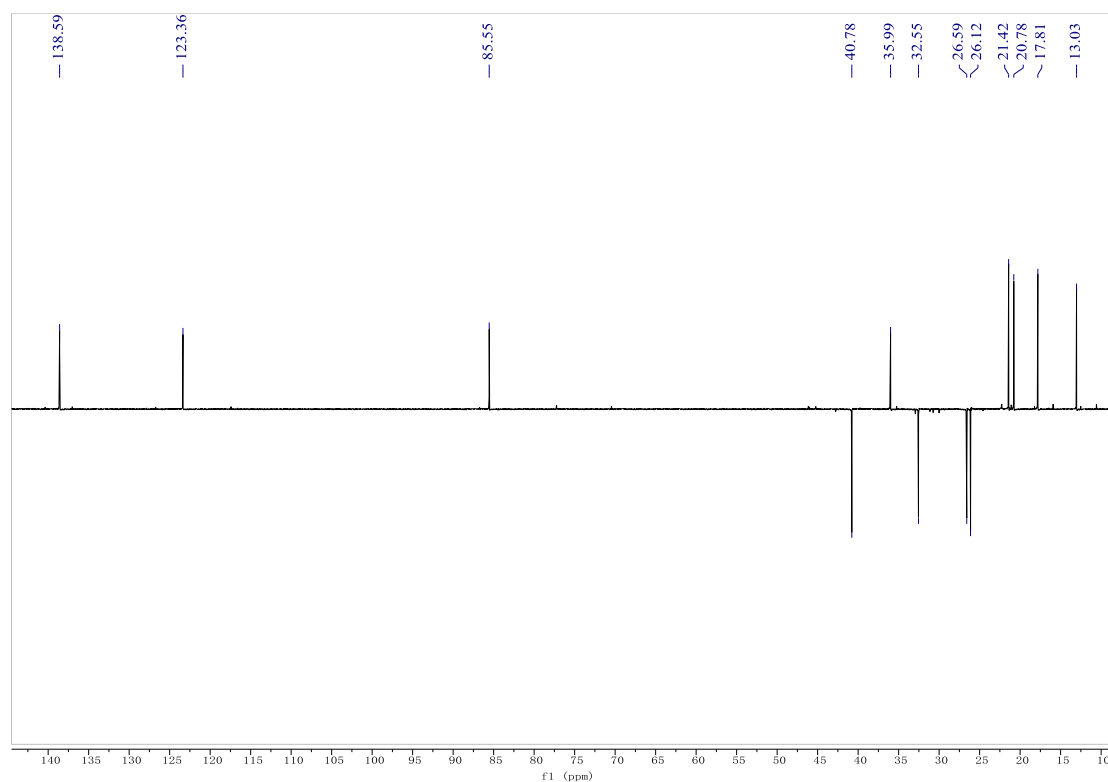

**Figure S8.** DEPT 135° spectrum of lineolemnene E (**1**) in CDCl<sub>3</sub>

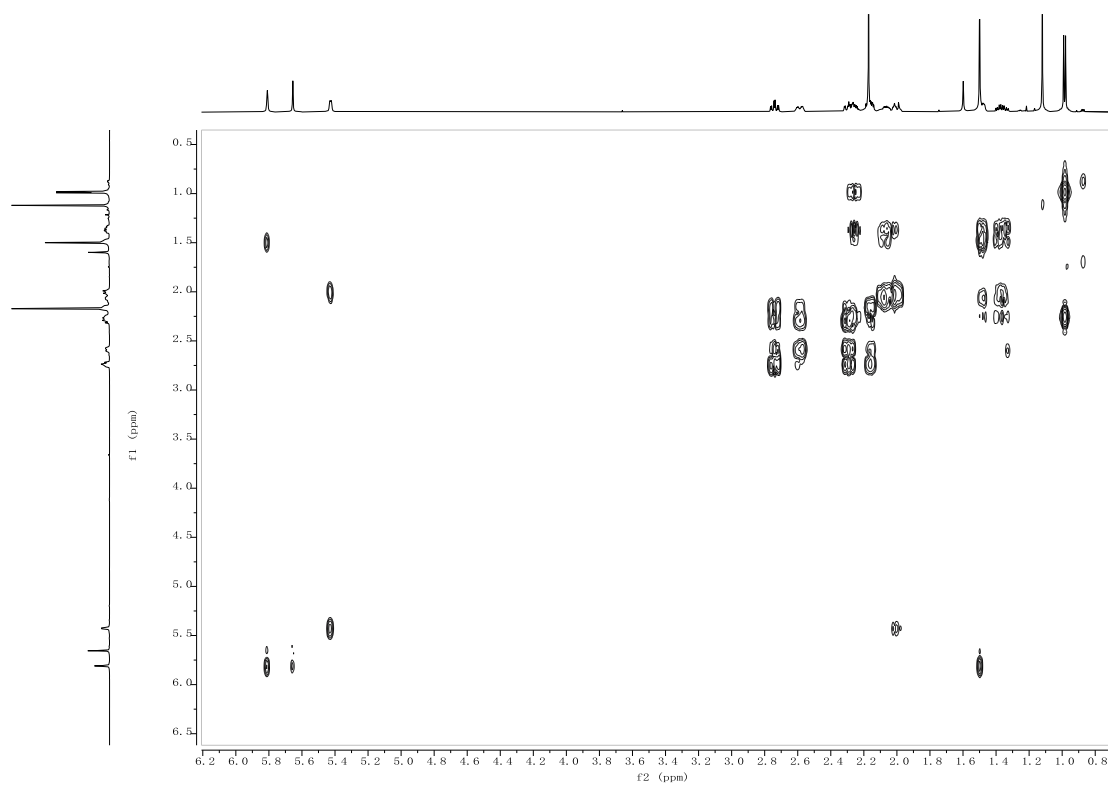

**Figure S9.** <sup>1</sup>H-<sup>1</sup>H COSY spectrum of lineolemnene E (**1**) in CDCl<sub>3</sub>

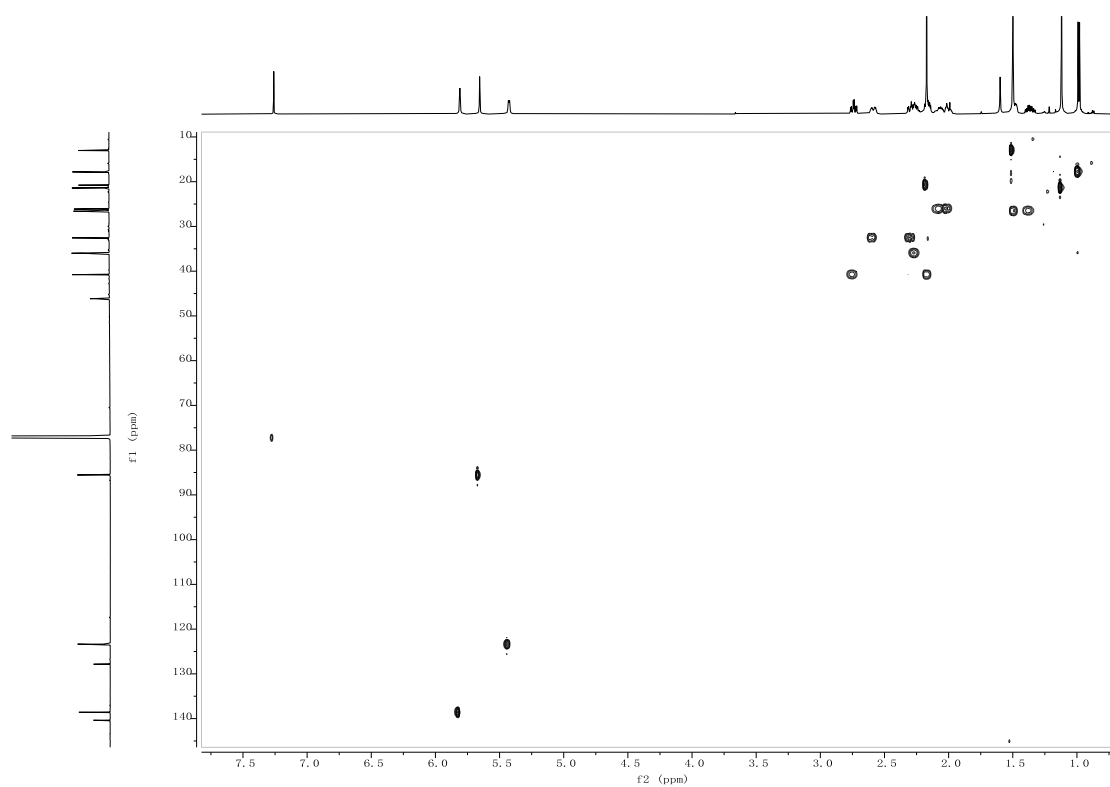

**Figure S10.** HSQC spectrum of lineolemnene E (**1**) in  $\text{CDCl}_3$

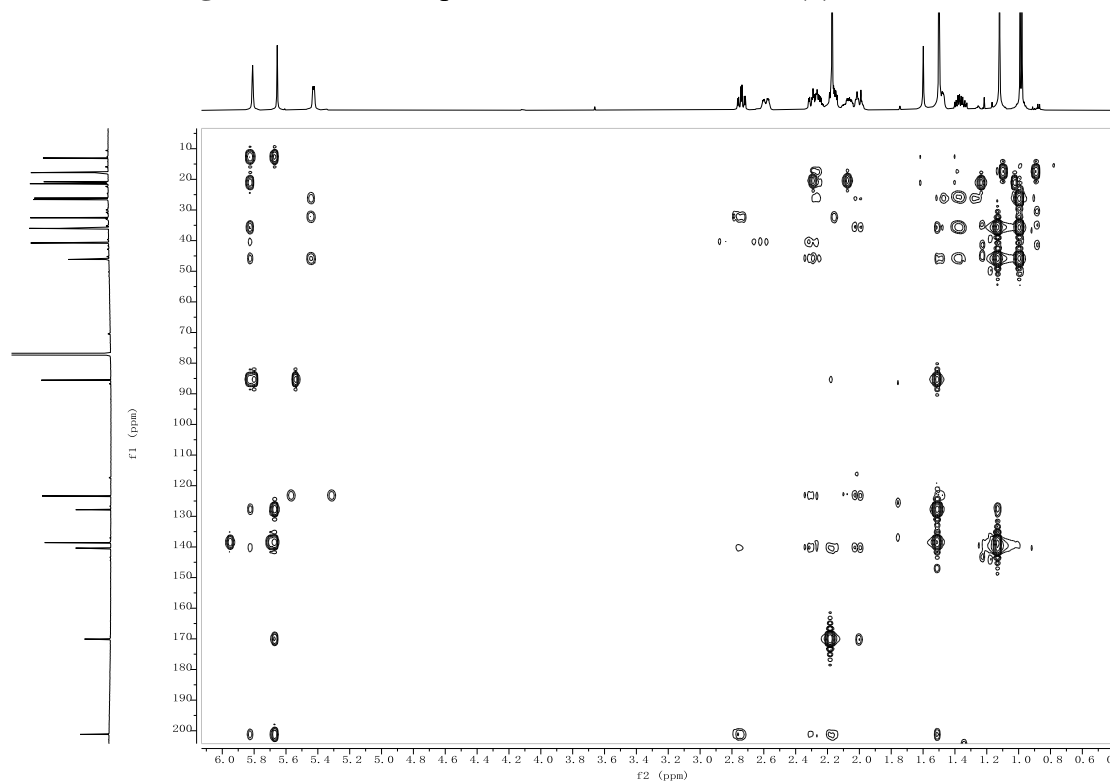

**Figure S11.** HMBC spectrum of lineolemnene E (**1**) in  $\text{CDCl}_3$



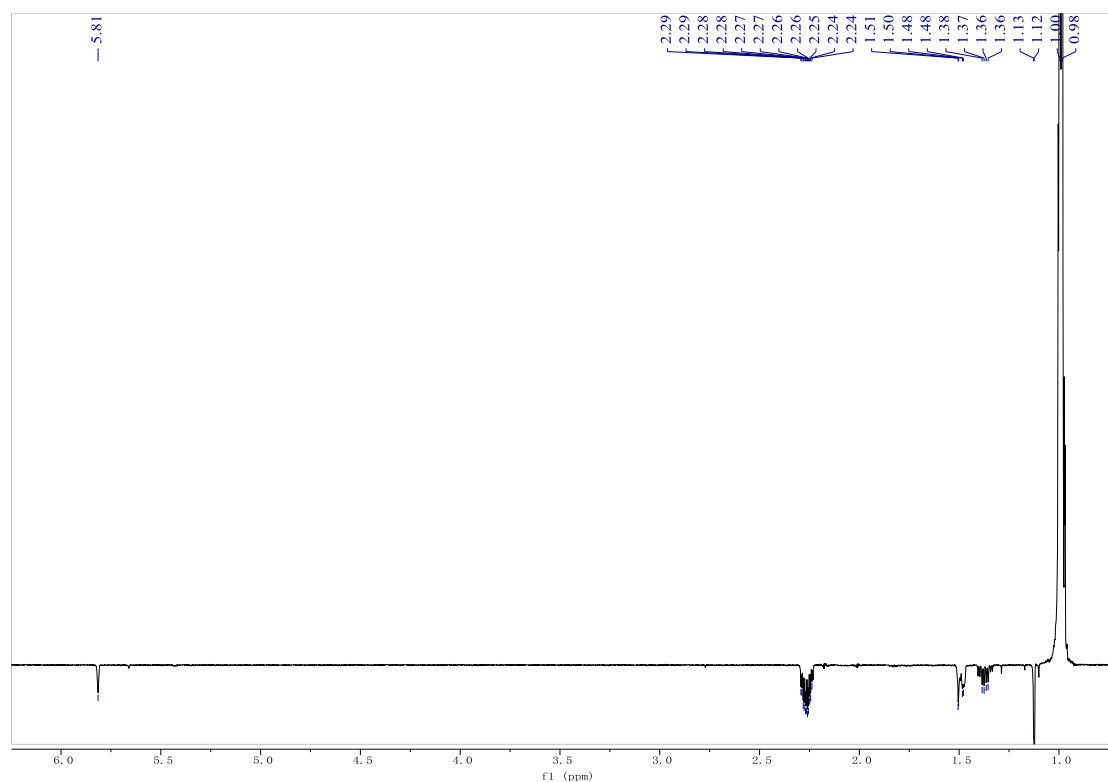

**Figure S12.** NOESY spectrum of lineolemnene E (1) in CDCl<sub>3</sub>

## 6. Spectroscopic data for lineolemnene F (2)

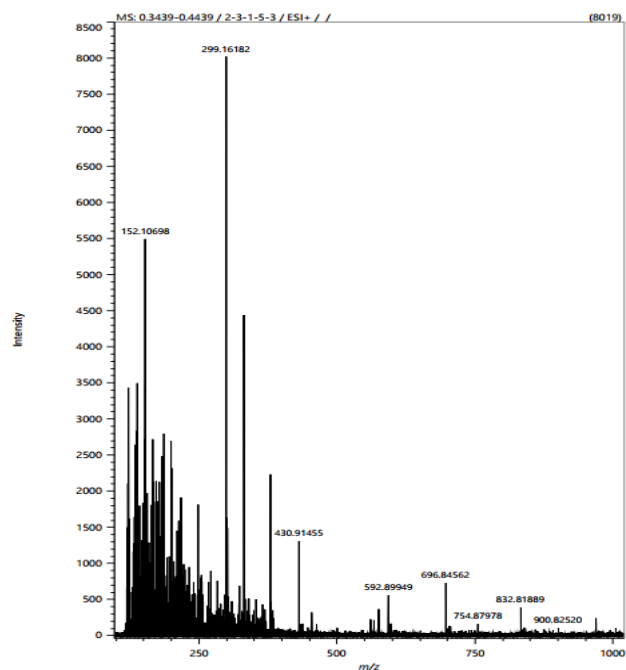

**Figure S13.** HRESIMS spectrum of lineolemnene F (2)

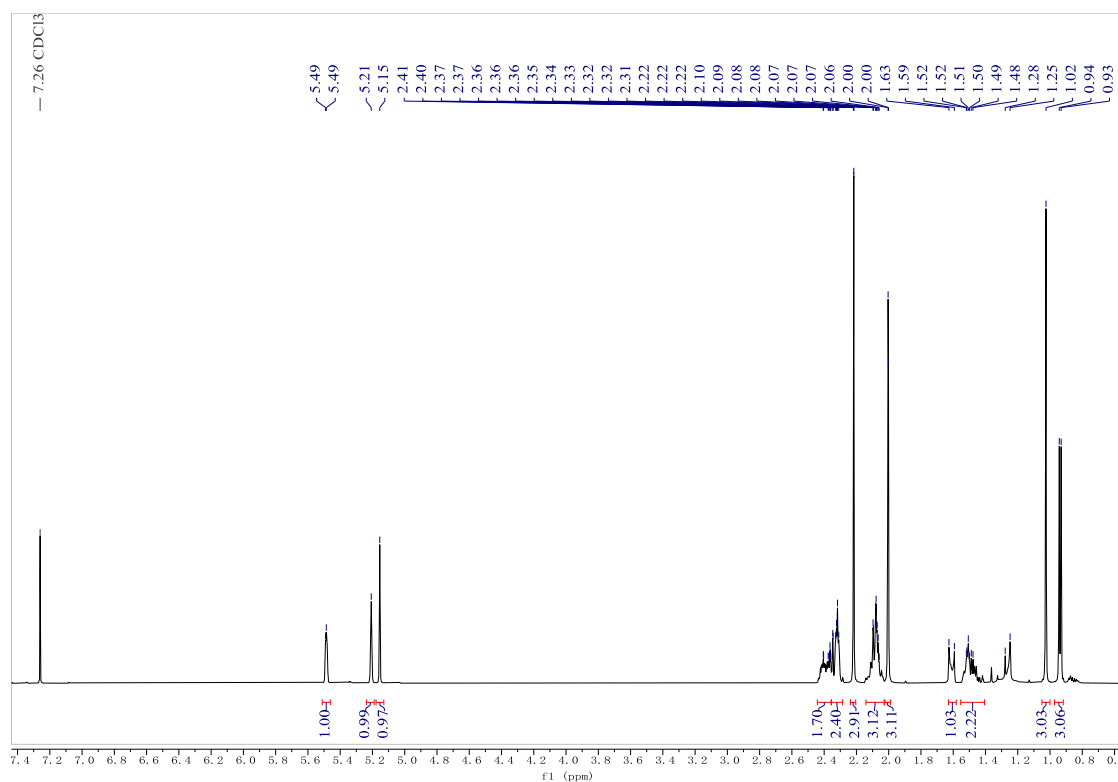

**Figure S14.** <sup>1</sup>H-NMR spectrum of lineolemnene F (**2**) in CDCl<sub>3</sub>

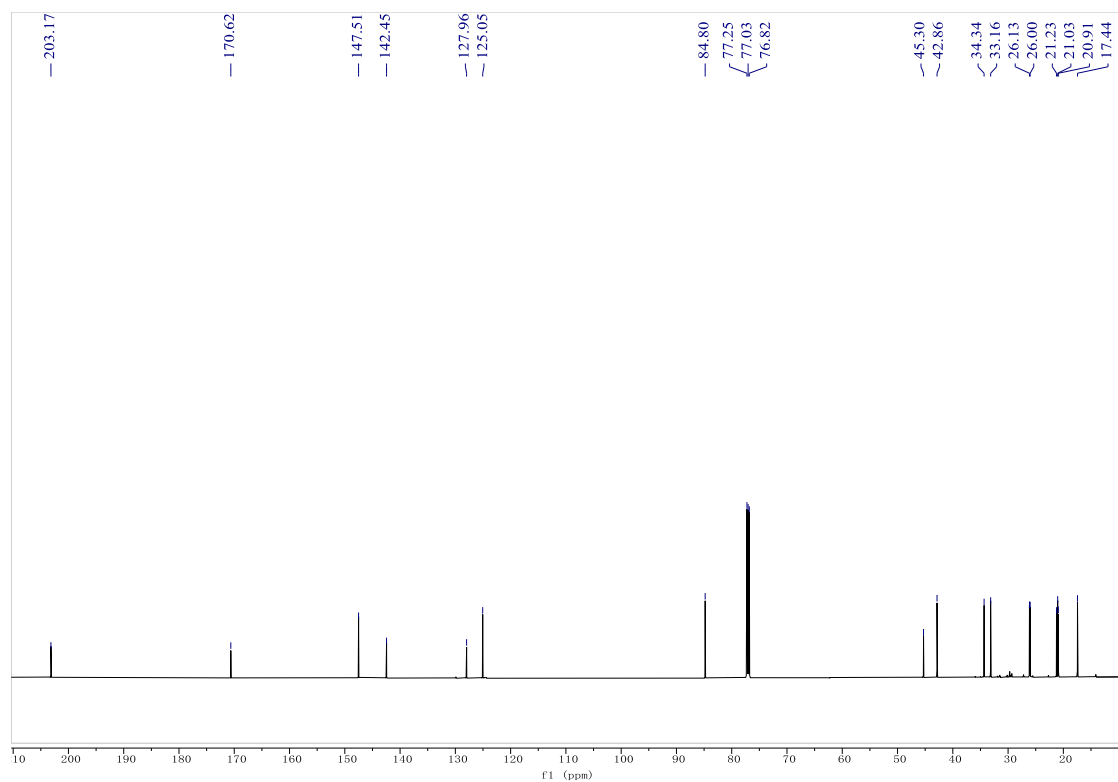

**Figure S15.** <sup>13</sup>C-NMR spectrum of lineolemnene F (**2**) in CDCl<sub>3</sub>

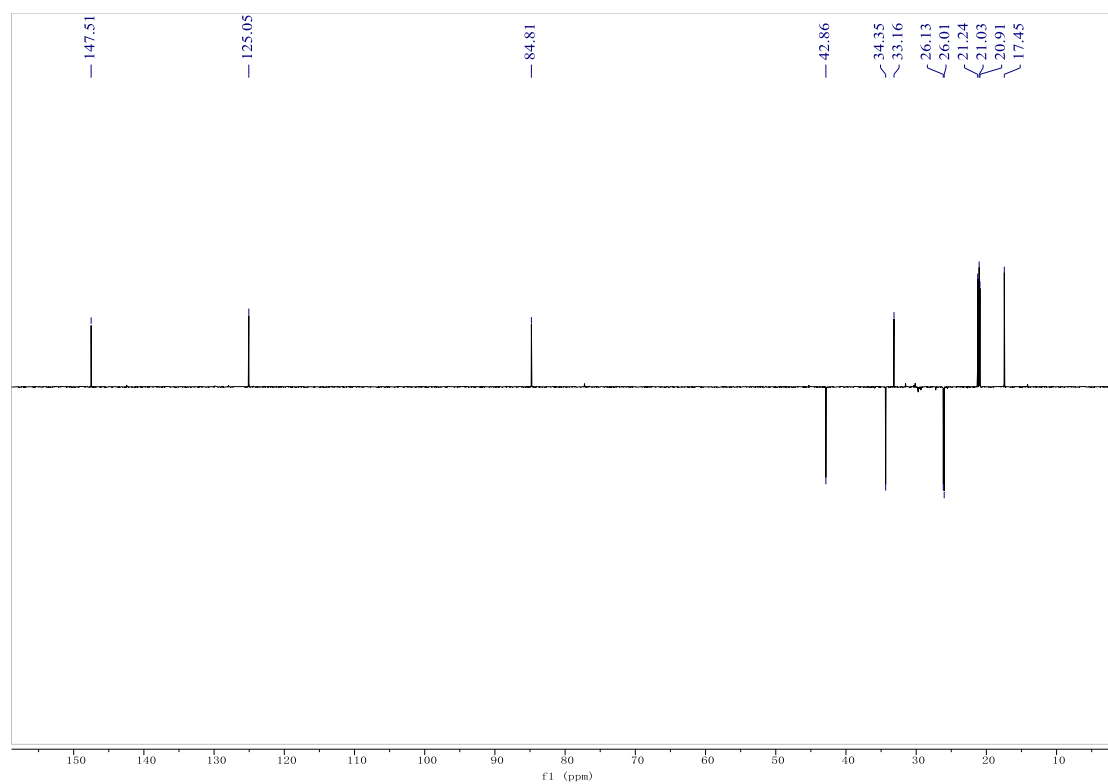

**Figure S16.** DEPT 135° spectrum of lineolemnene F (**2**) in CDCl<sub>3</sub>

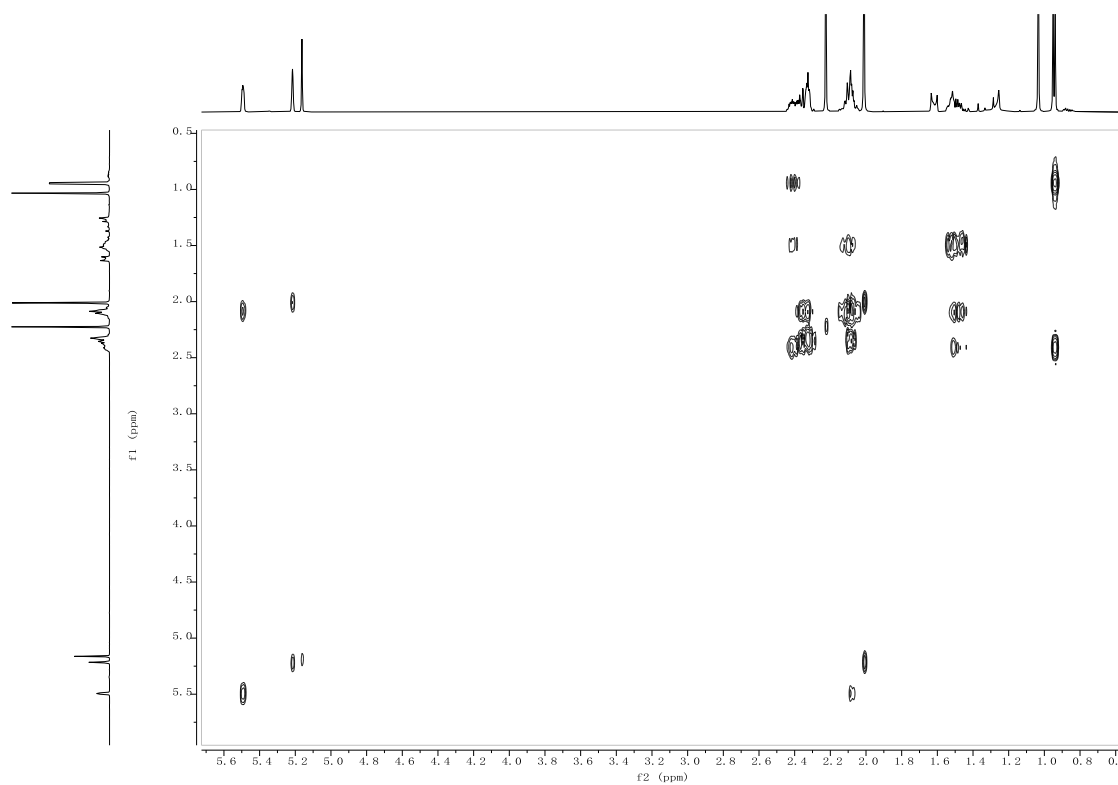

**Figure S17.** <sup>1</sup>H-<sup>1</sup>H COSY spectrum of lineolemnene F (**2**) in CDCl<sub>3</sub>

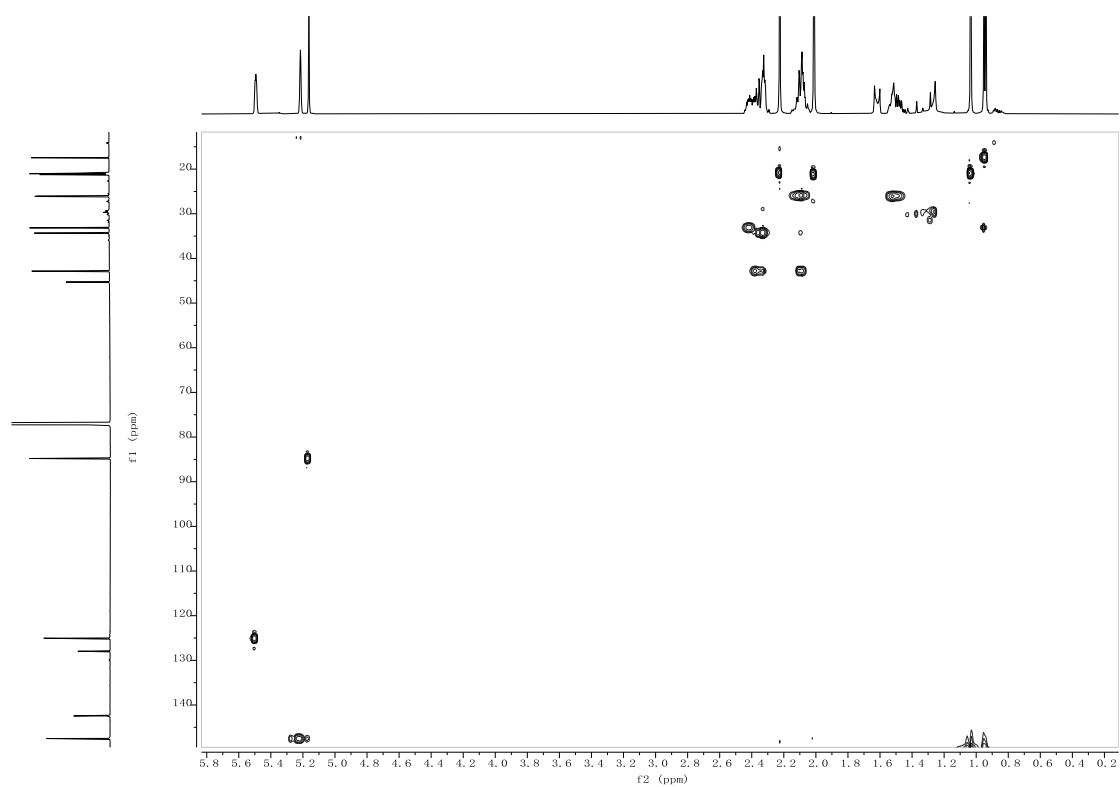

**Figure S18.** HSQC spectrum of lineolemnene F(2) in CDCl<sub>3</sub>

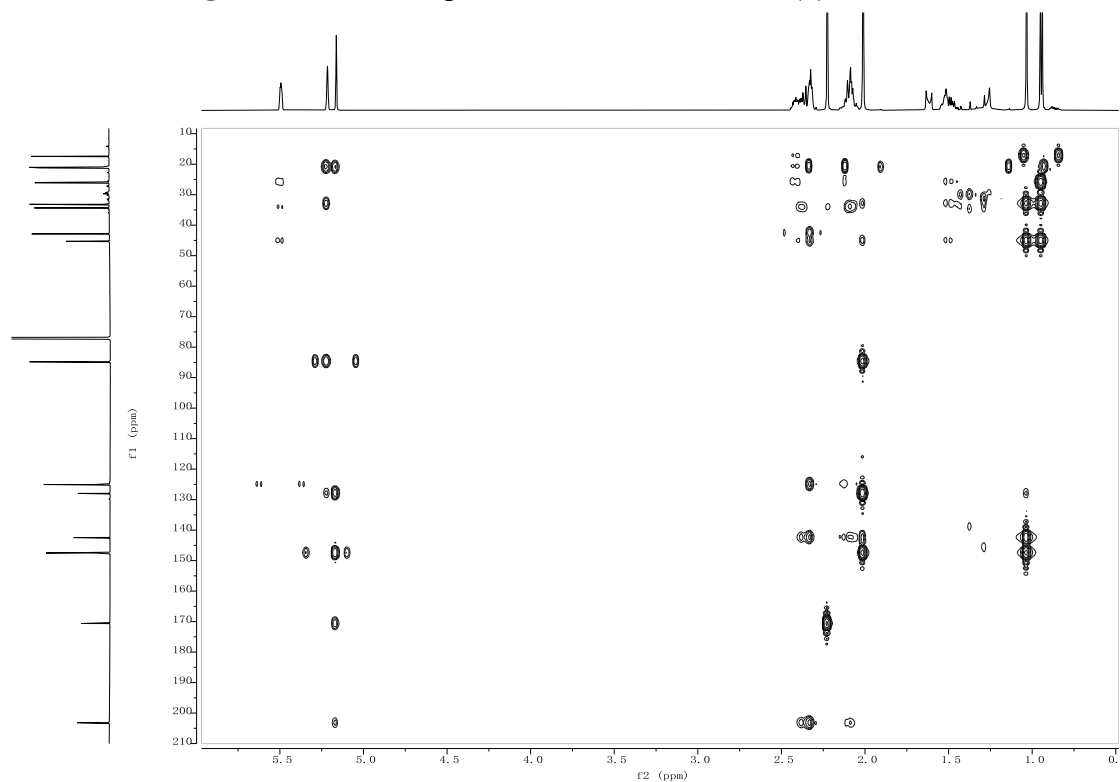

**Figure S19.** HMBC spectrum of lineolemnene F (2) in CDCl<sub>3</sub>

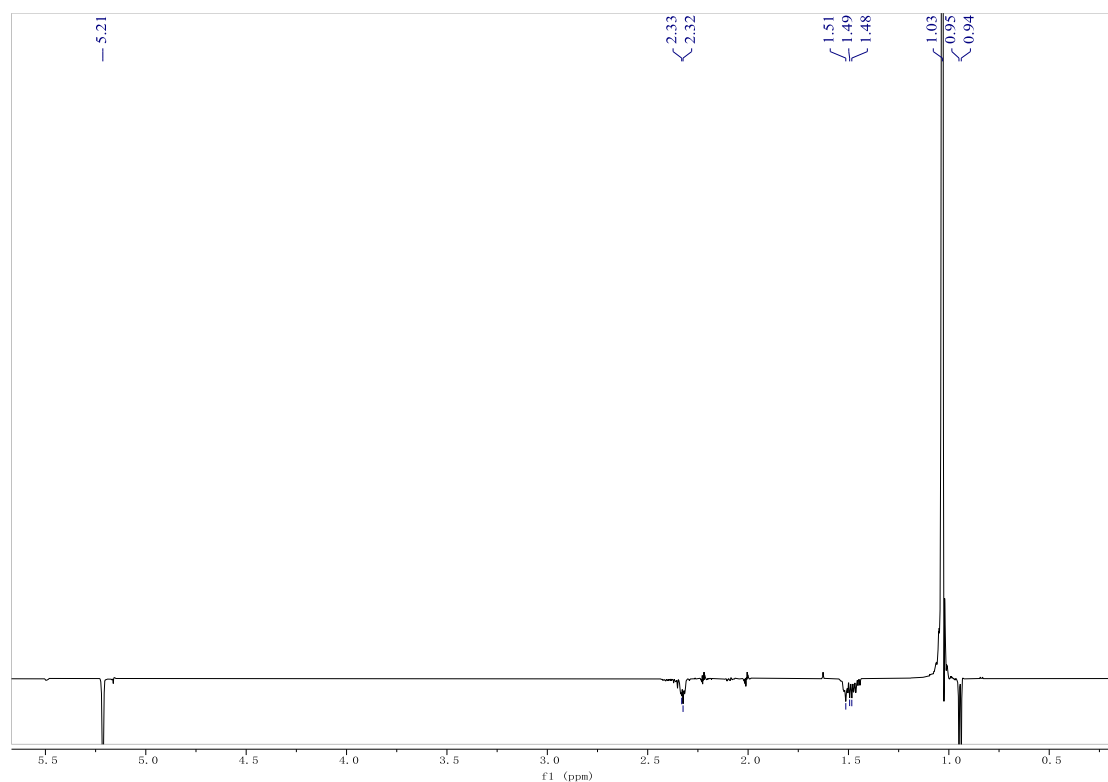

**Figure S20.** NOESY spectrum of lineolemnene F (2) in CDCl<sub>3</sub>

## 7. Spectroscopic data for lineolemnene G (3)

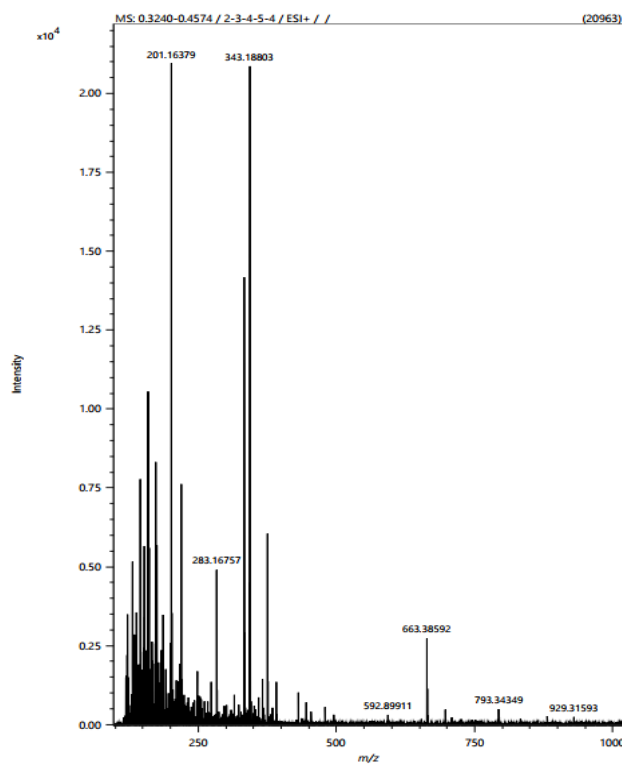

**Figure S21.** HRESIMS spectrum of lineolemnene G (3)

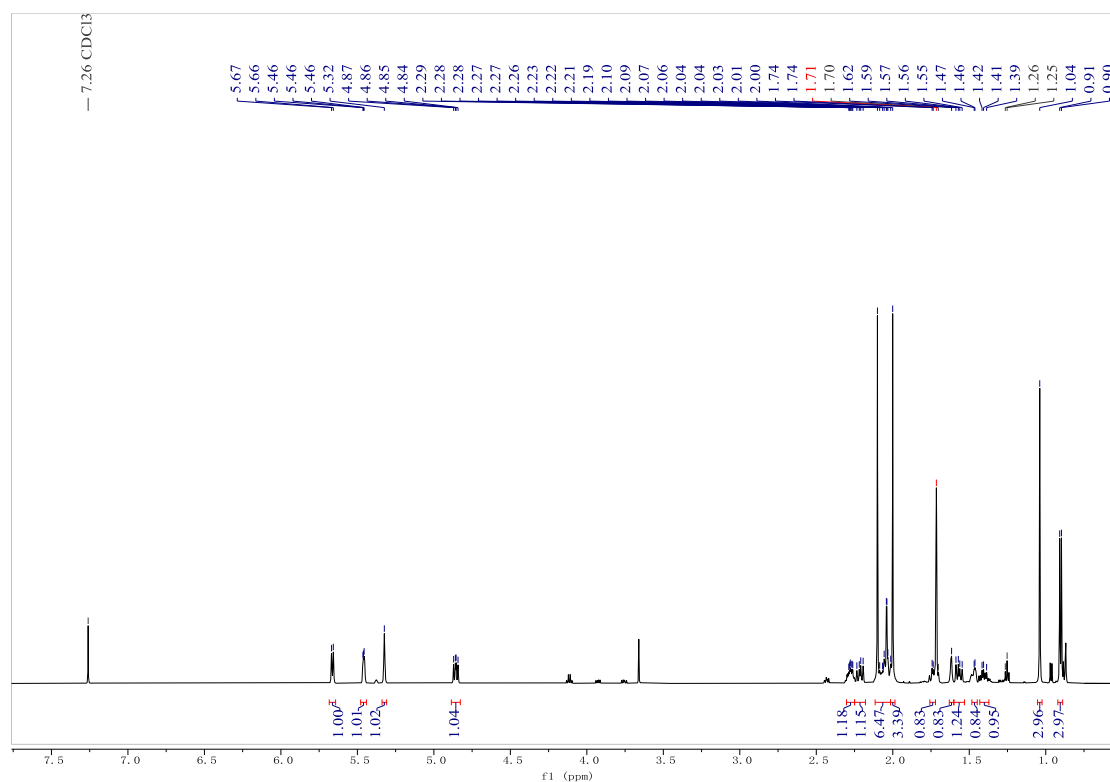

**Figure S22.** <sup>1</sup>H-NMR spectrum of lineolemnene G (**3**) in CDCl<sub>3</sub>

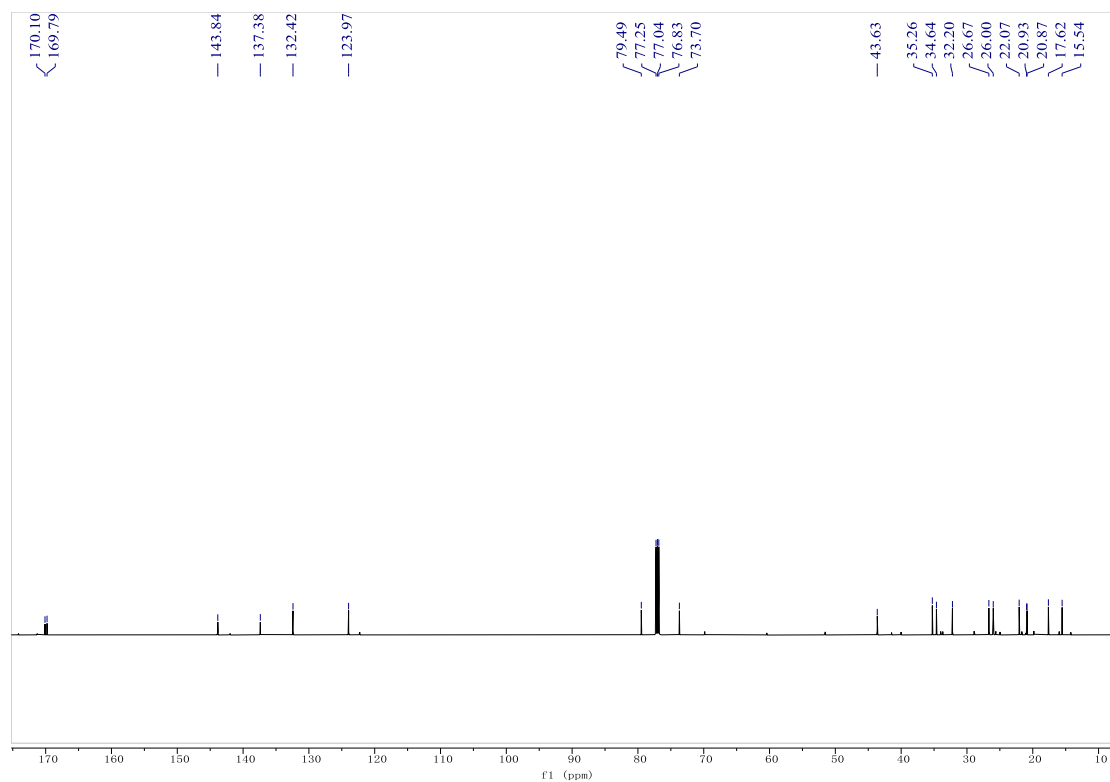

**Figure S23.** <sup>13</sup>C-NMR spectrum of lineolemnene G (**3**) in CDCl<sub>3</sub>

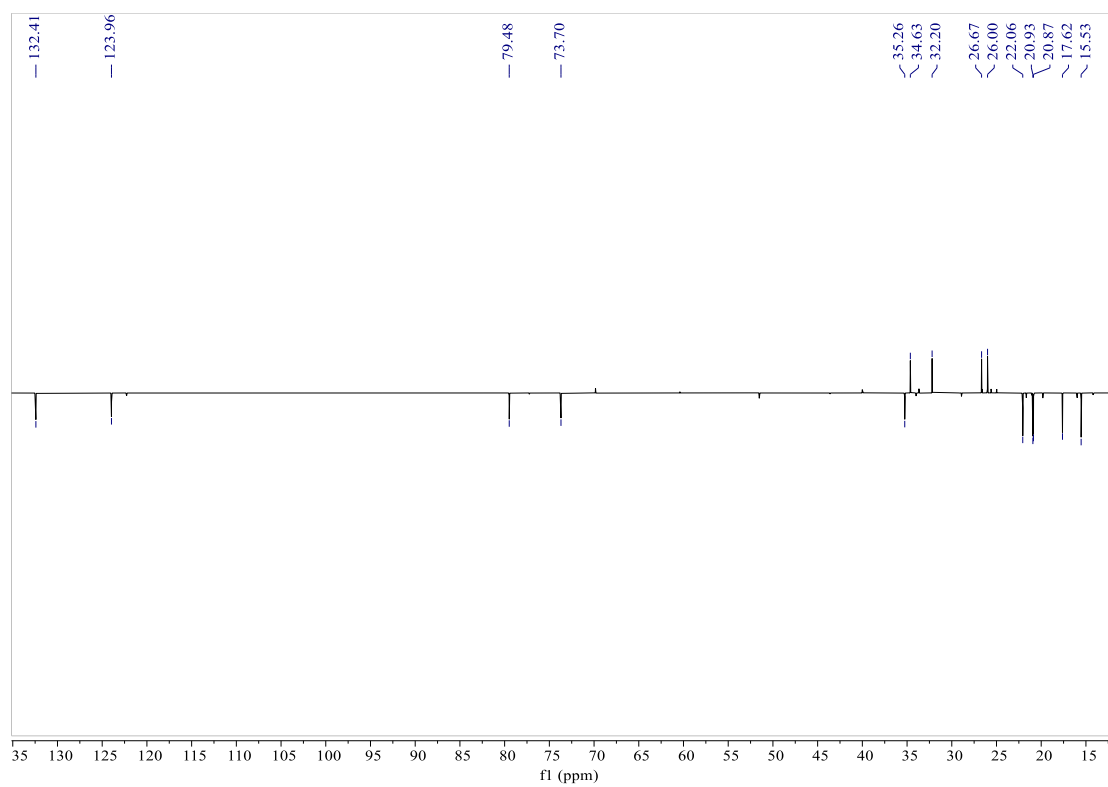

**Figure S24.** DEPT 135° spectrum of lineolemnene G (3) in CDCl<sub>3</sub>

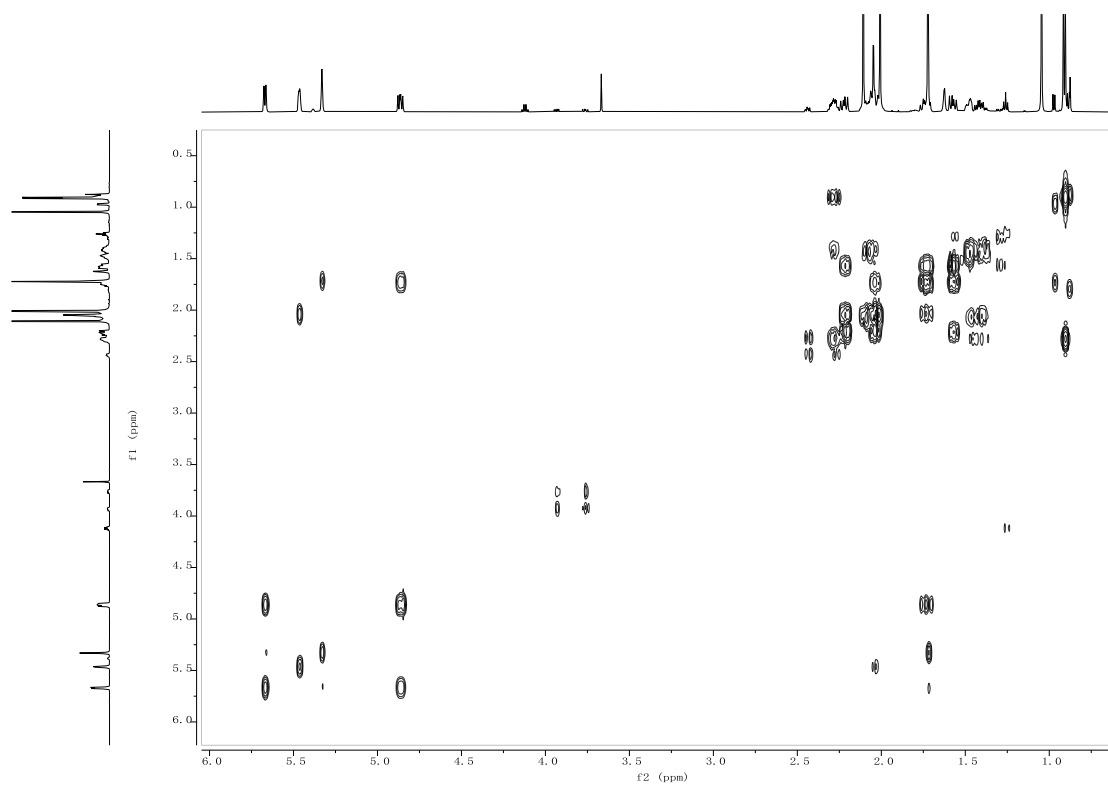

**Figure S25.** <sup>1</sup>H-<sup>1</sup>H COSY spectrum of lineolemnene G (3) in CDCl<sub>3</sub>

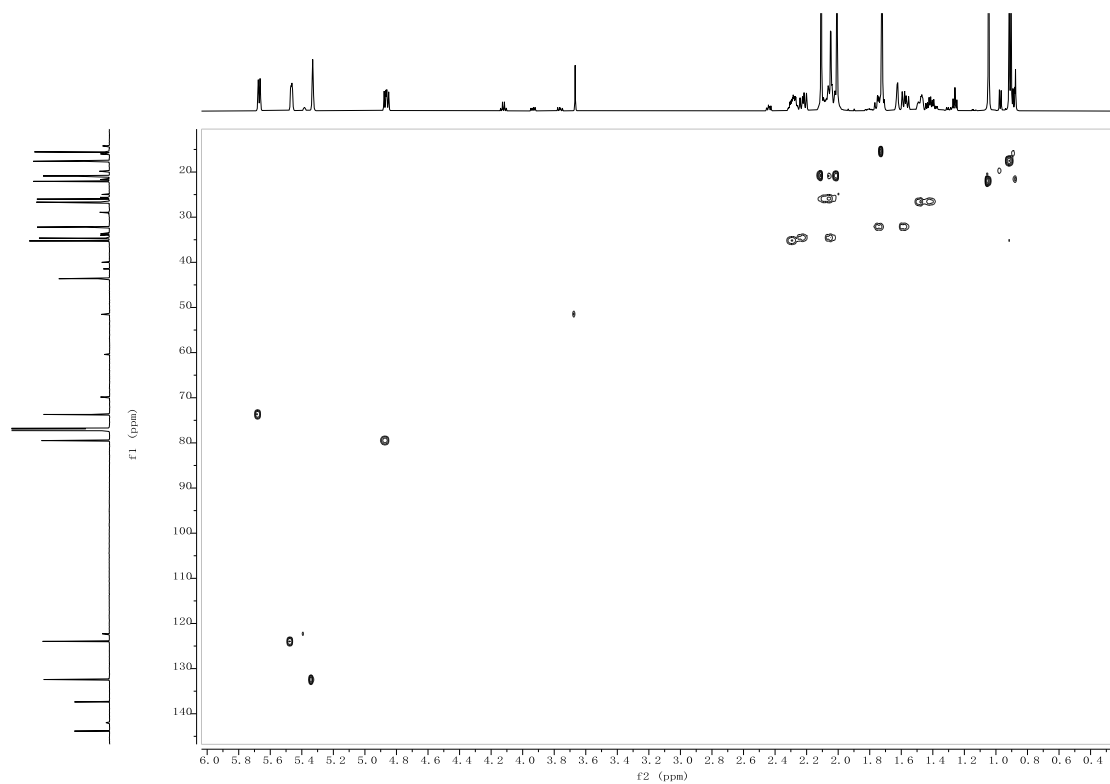

**Figure S26.** HSQC spectrum of lineolemnene G(3) in  $\text{CDCl}_3$

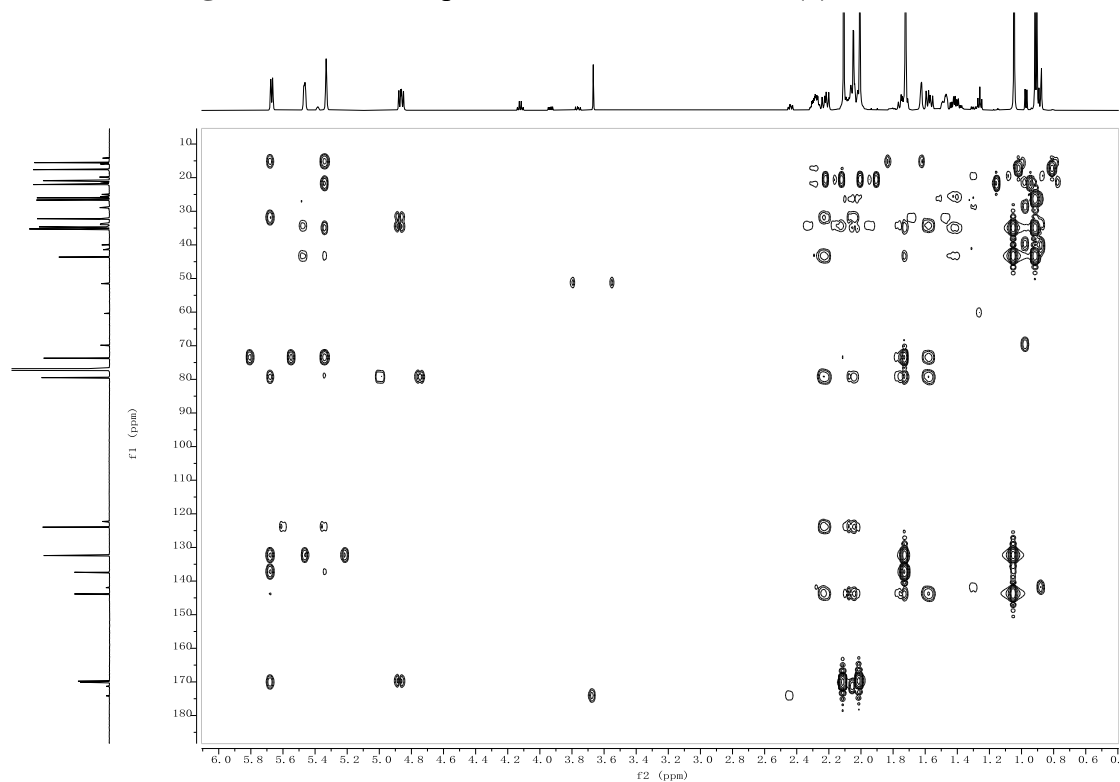

**Figure S27.** HMBC spectrum of lineolemnene G (3) in  $\text{CDCl}_3$



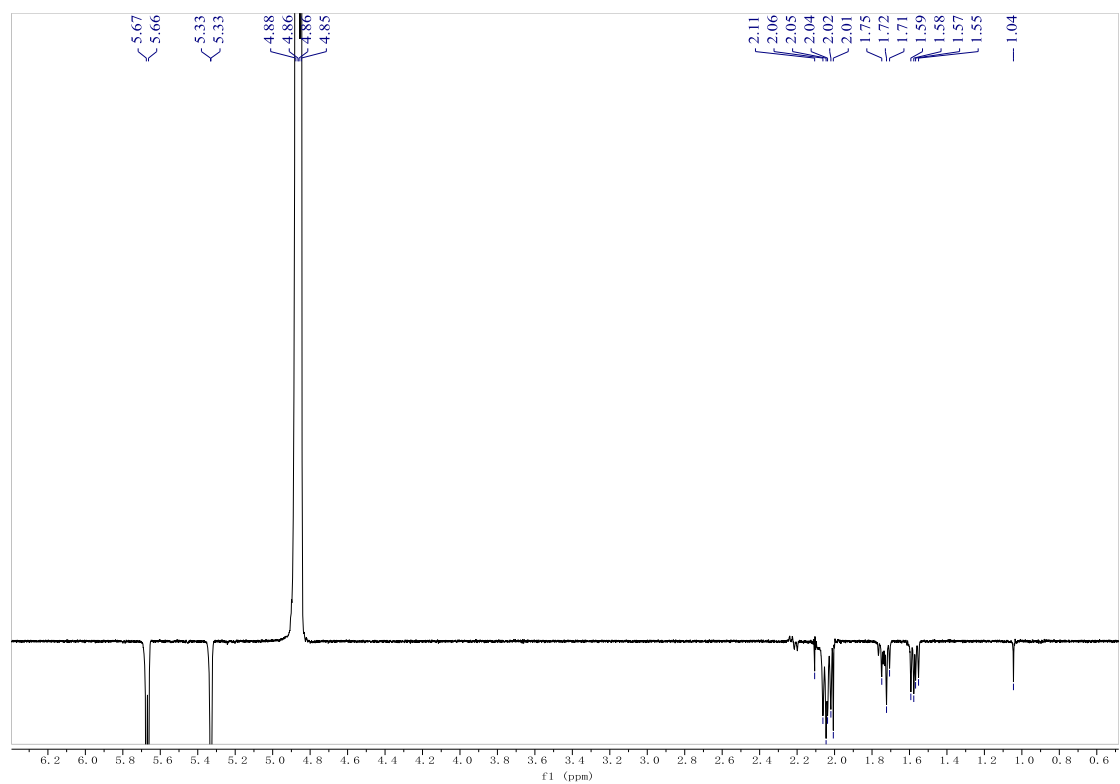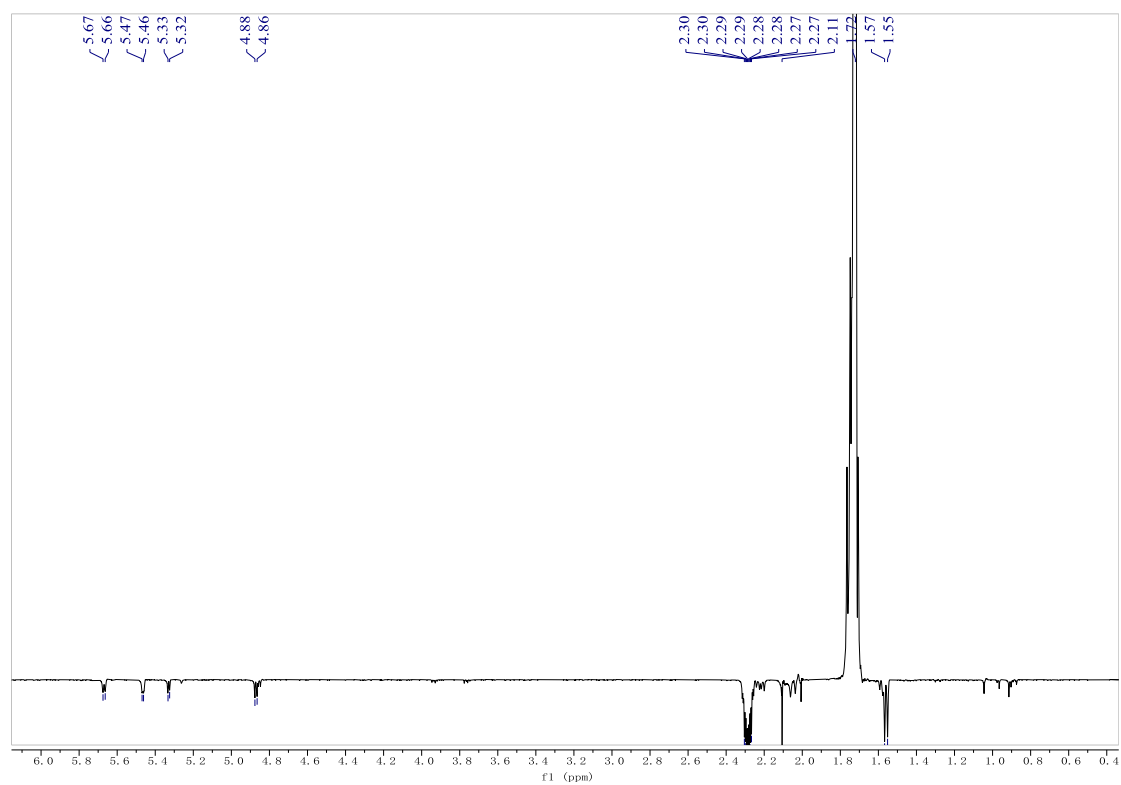

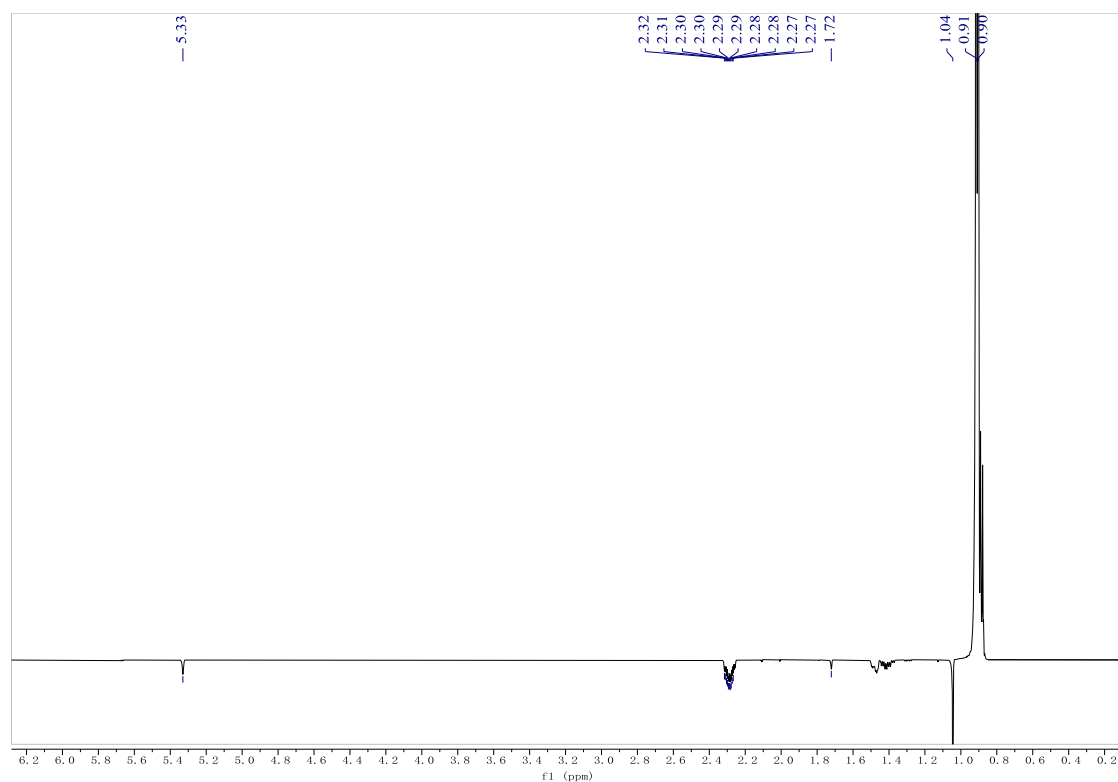

**Figure S28.** NOESY spectrum of lineolemnene G (**3**) in  $\text{CDCl}_3$

## 8. Spectroscopic data for 2-acetoxy-aristolane (**4**)

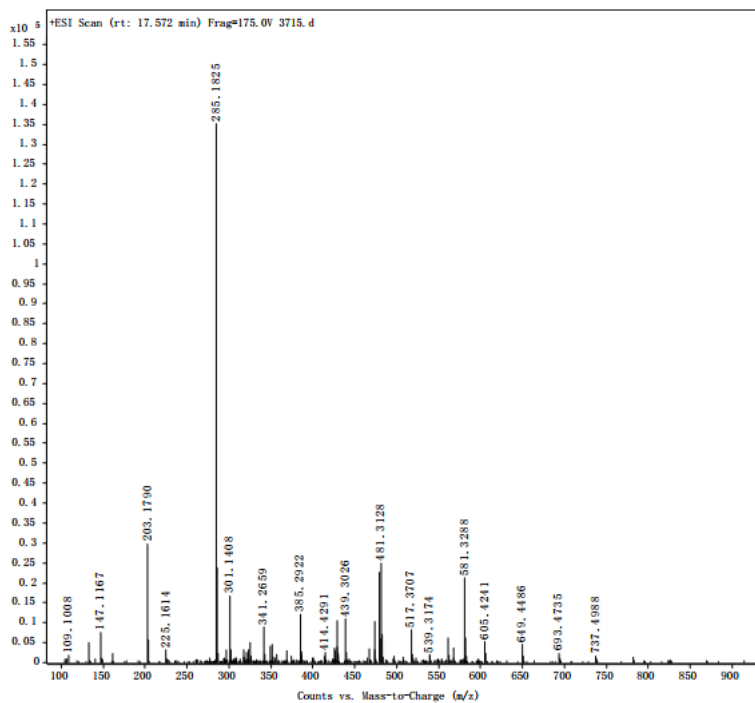

**Figure S29.** HRESIMS spectrum of 2-acetoxy-aristolane (**4**)

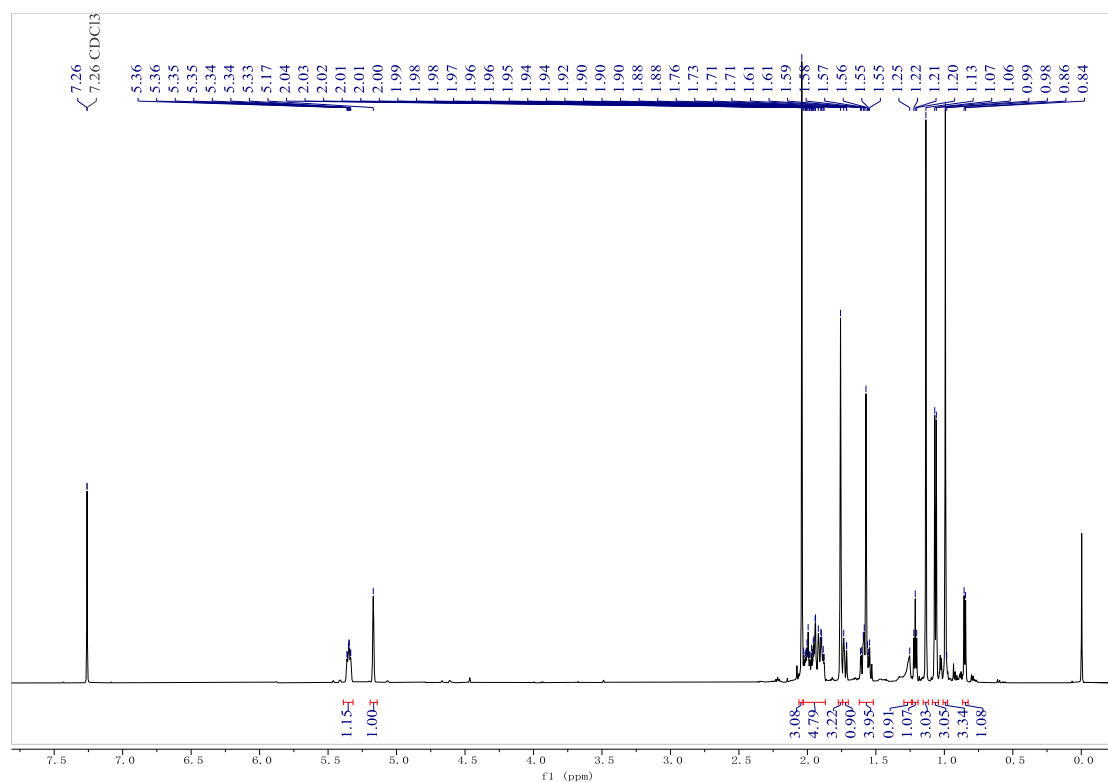

**Figure S30.** <sup>1</sup>H-NMR spectrum of 2-acetoxy-aristolane (**4**) in CDCl<sub>3</sub>

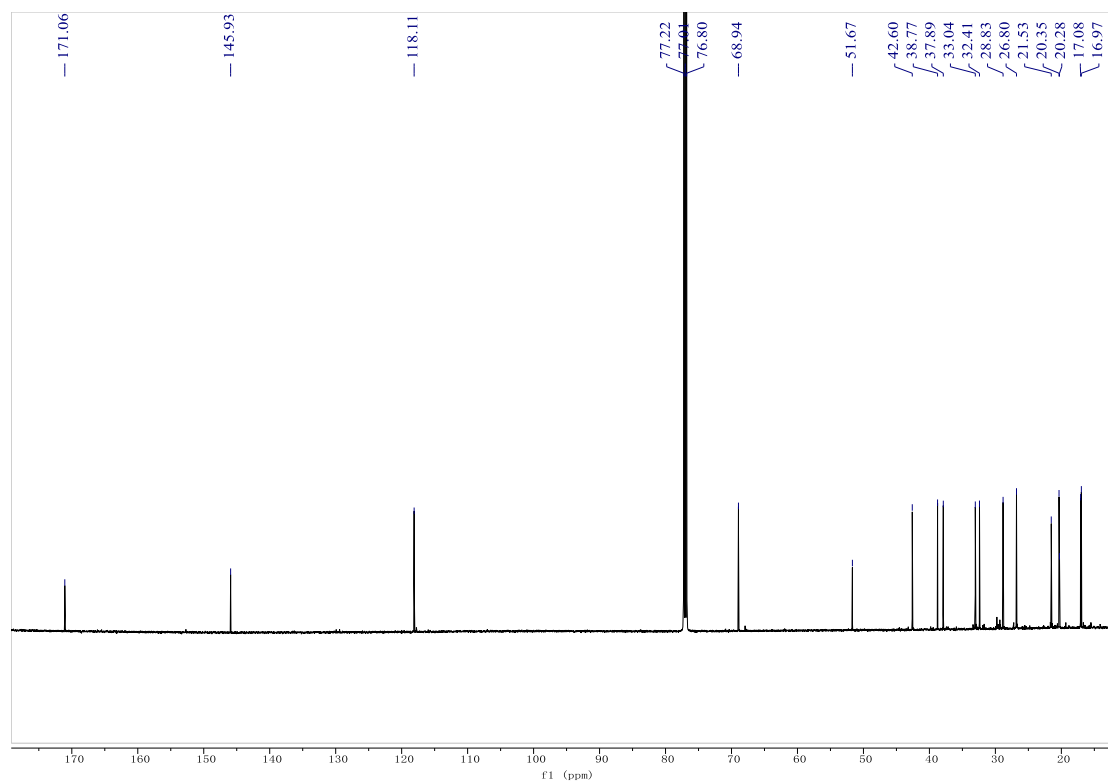

**Figure S31.** <sup>13</sup>C-NMR spectrum of 2-acetoxy-aristolane (**4**) in CDCl<sub>3</sub>

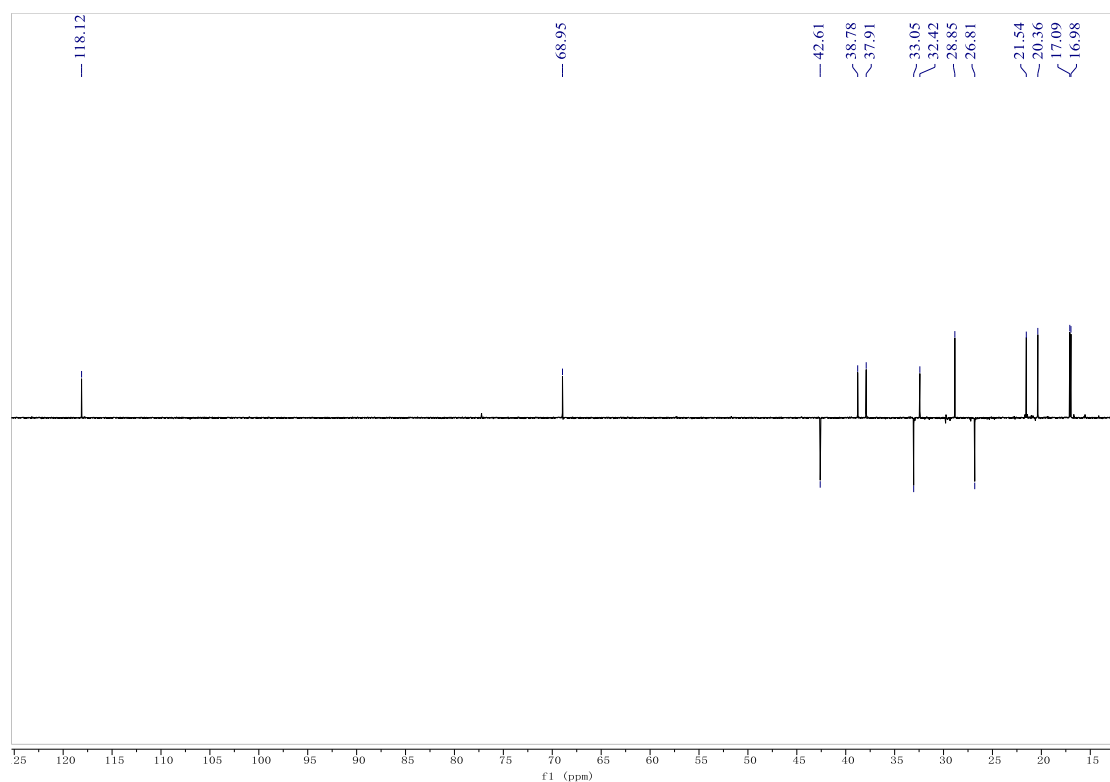

**Figure S32.** DEPT 135° spectrum of 2-acetoxy-aristolane (4) in CDCl<sub>3</sub>

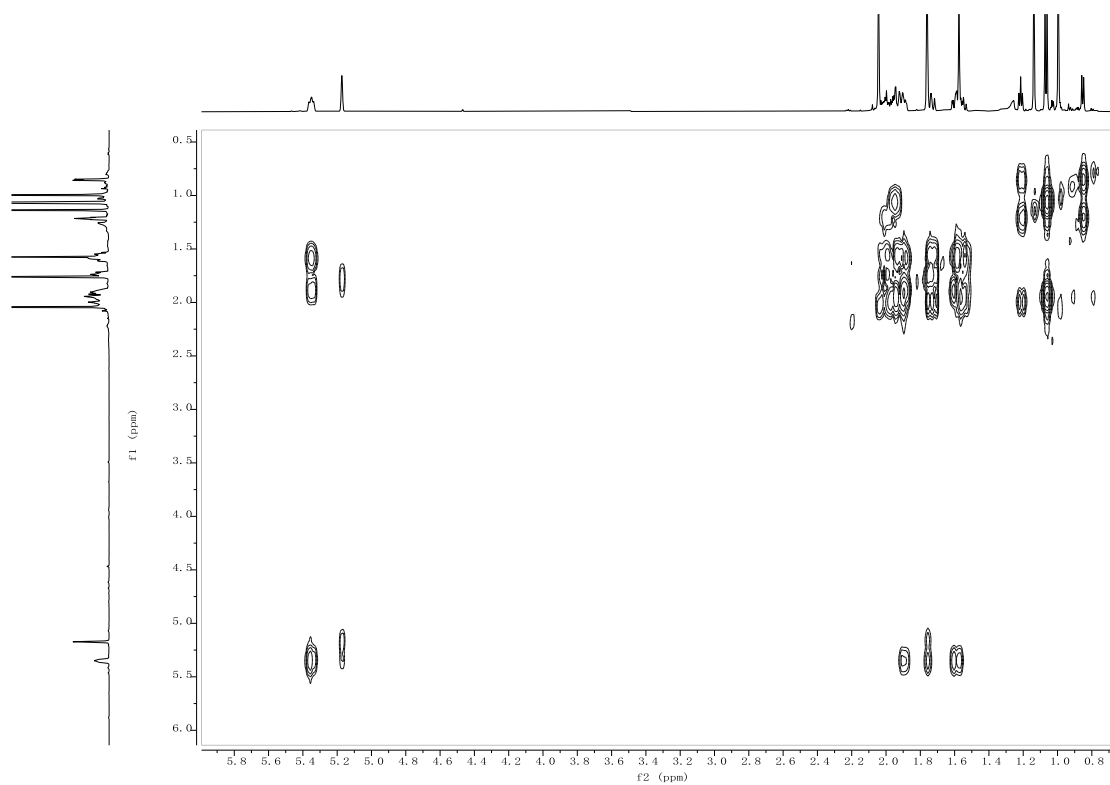

**Figure S33.** <sup>1</sup>H-<sup>1</sup>H COSY spectrum of 2-acetoxy-aristolane (4) in CDCl<sub>3</sub>

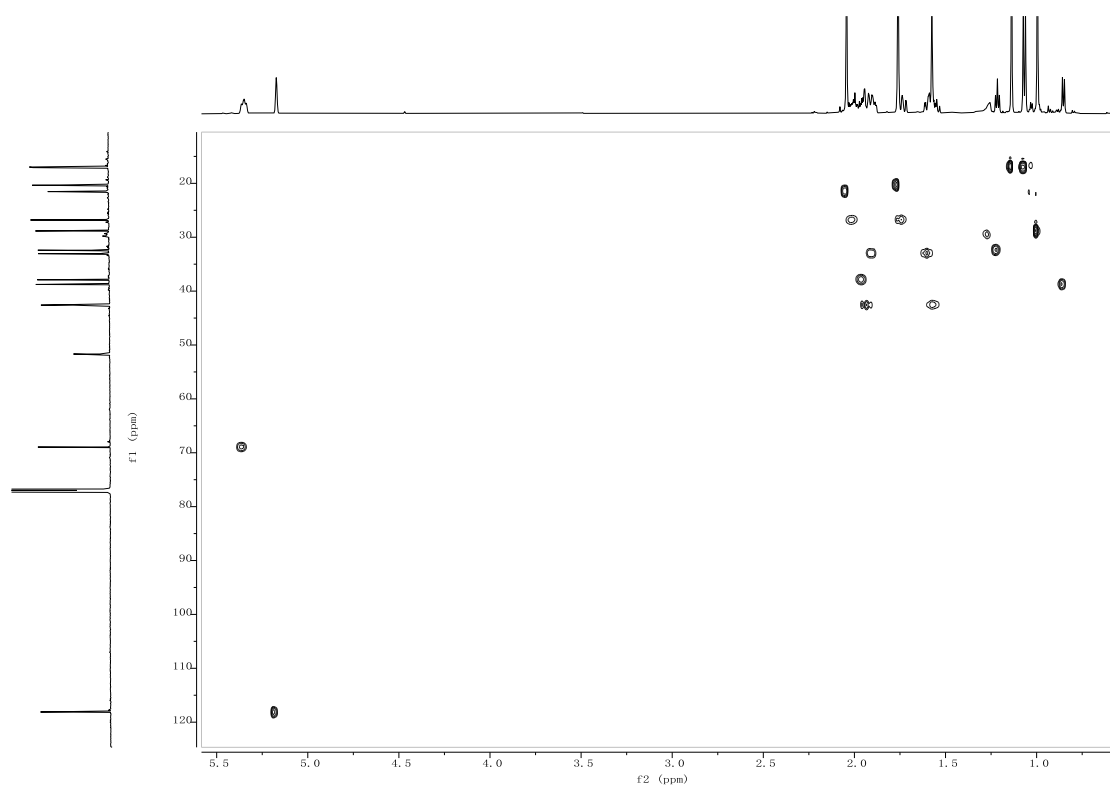

**Figure S34.** HSQC spectrum of 2-acetoxy-aristolane (**4**) in  $\text{CDCl}_3$

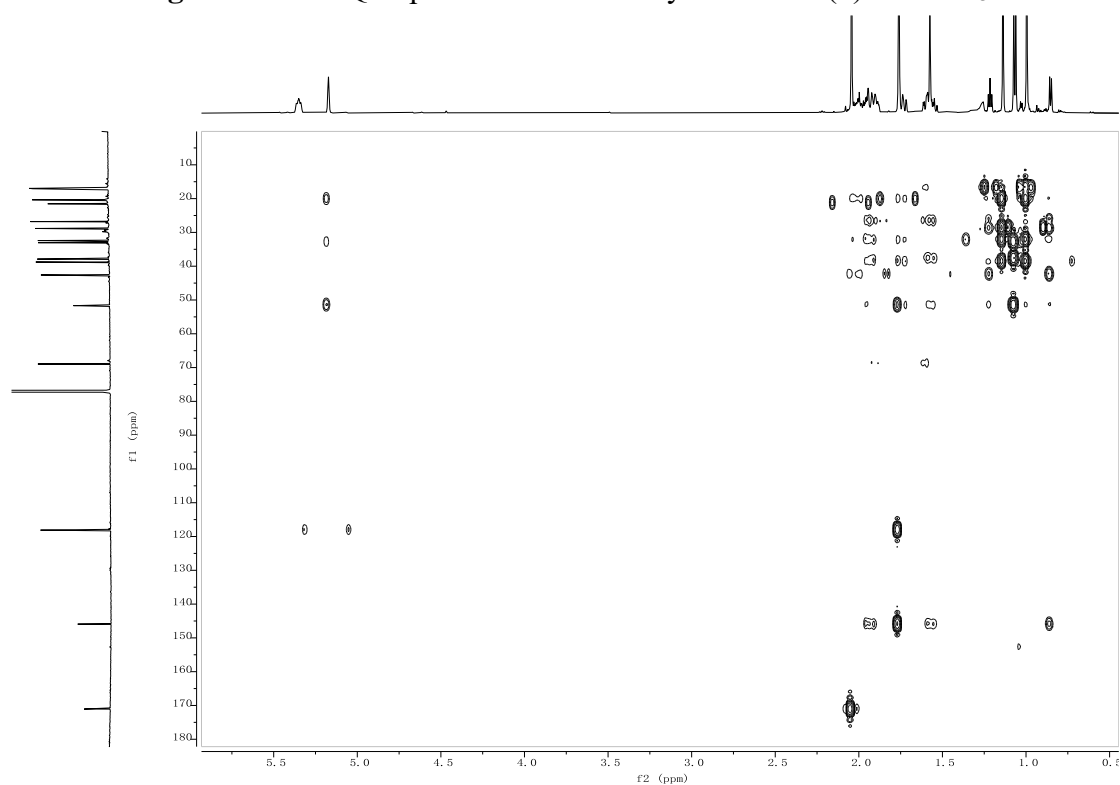

**Figure S35.** HMBC spectrum of 2-acetoxy-aristolane (**4**) in  $\text{CDCl}_3$

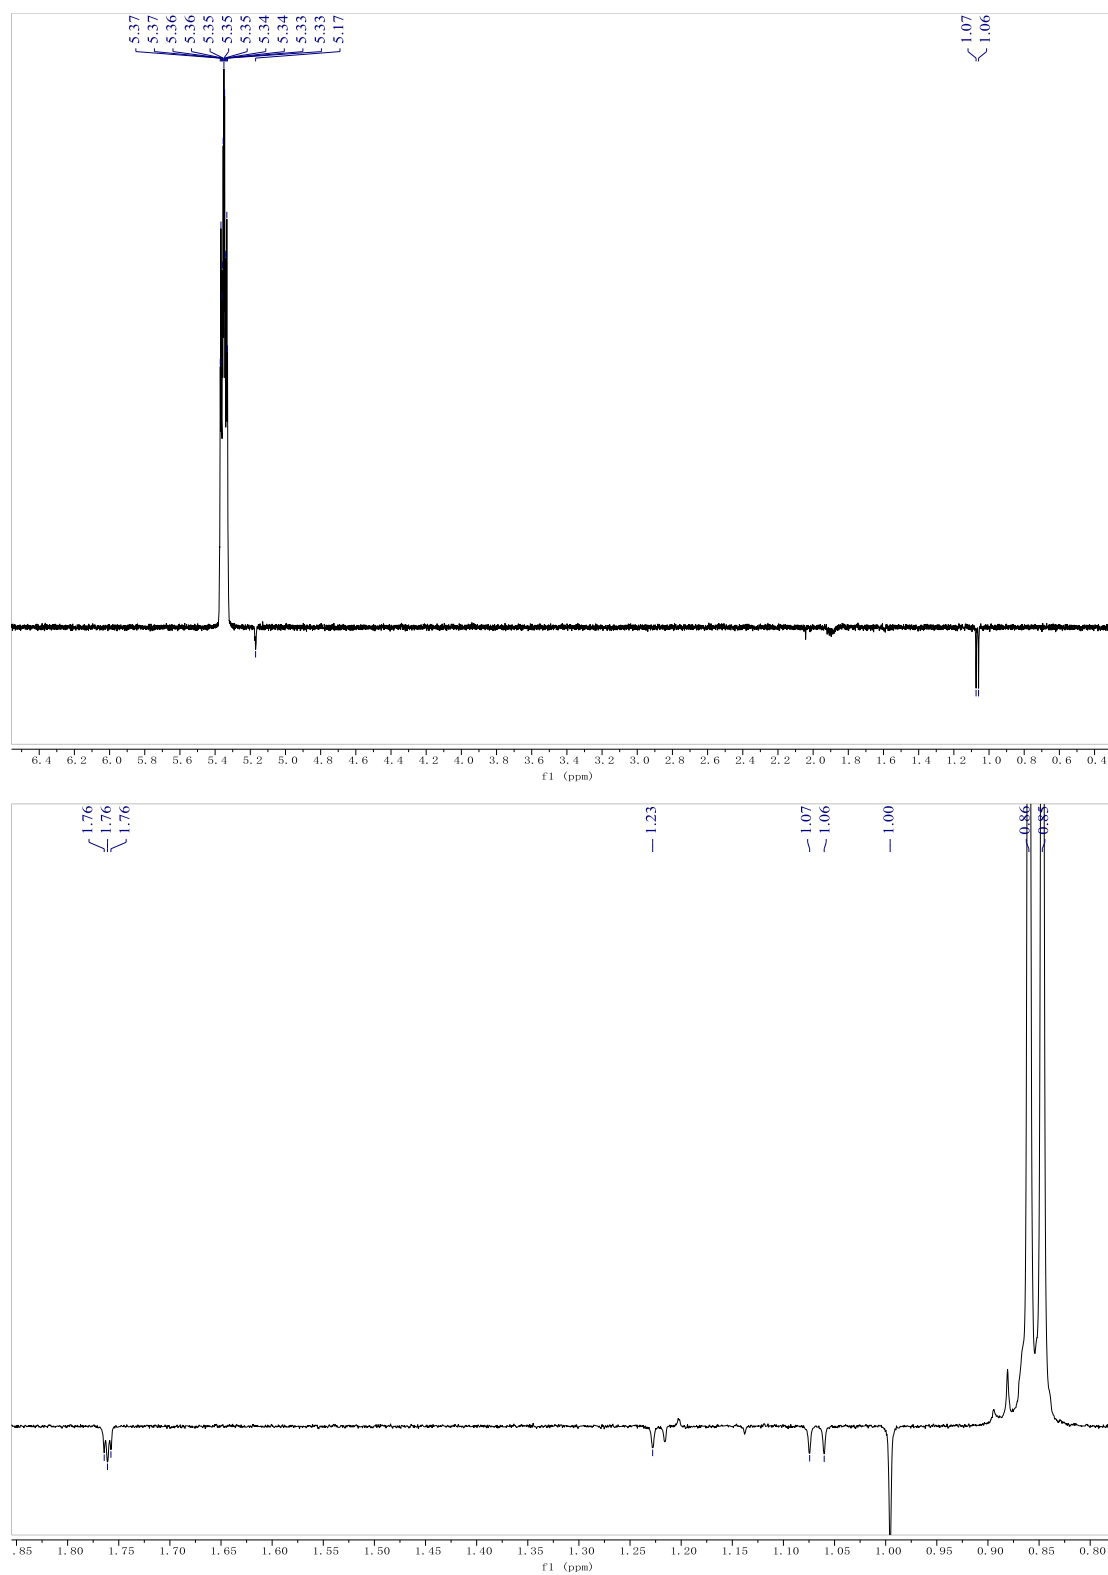

**Figure S36.** NOESY spectrum of 2-acetoxy-aristolane (**4**) in CDCl<sub>3</sub>

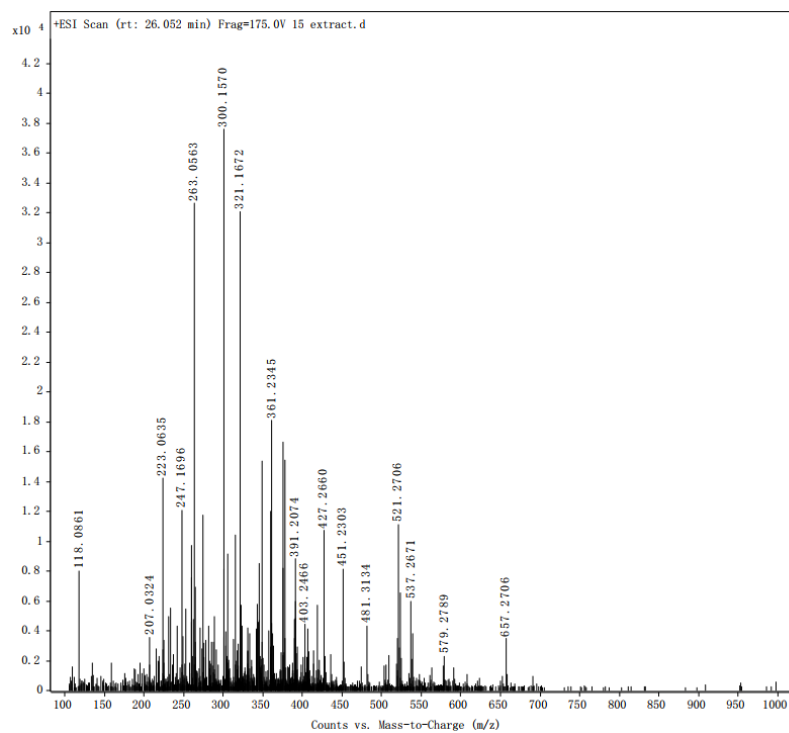

**Figure S37.**  $[M + H]^+$  of **4** extracted from the TIC of *Lemnalia* sp. methanol extract

## 9. Spectroscopic data for biofloranate A (**5**)

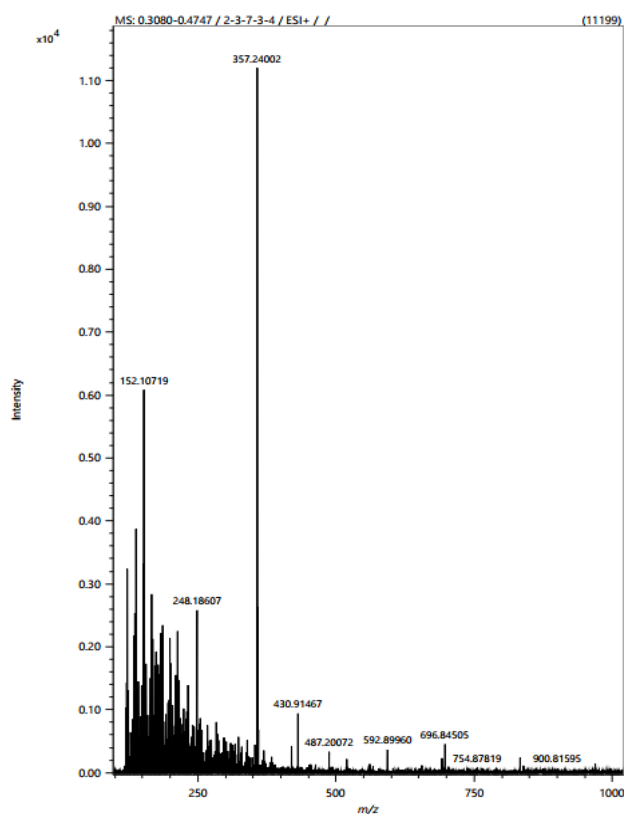

**Figure S38.** HRESIMS spectrum of biofloranate A (**5**)

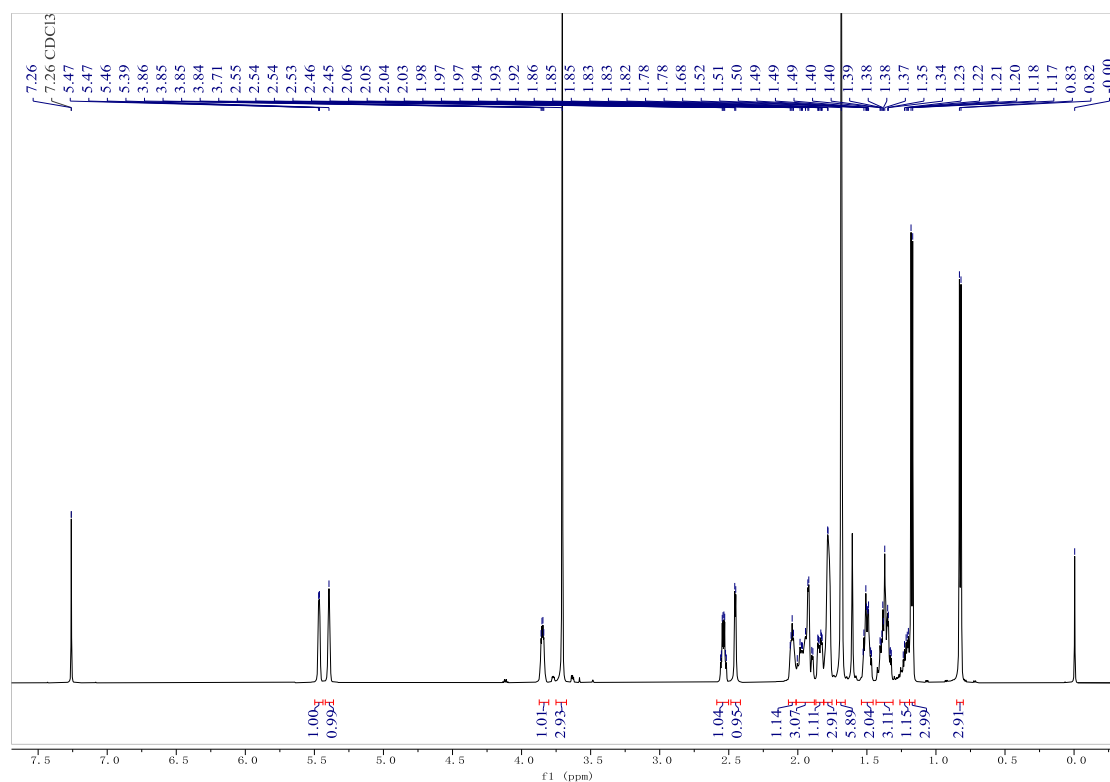

**Figure S39.** <sup>1</sup>H-NMR spectrum of bioflorante A (**5**) in CDCl<sub>3</sub>

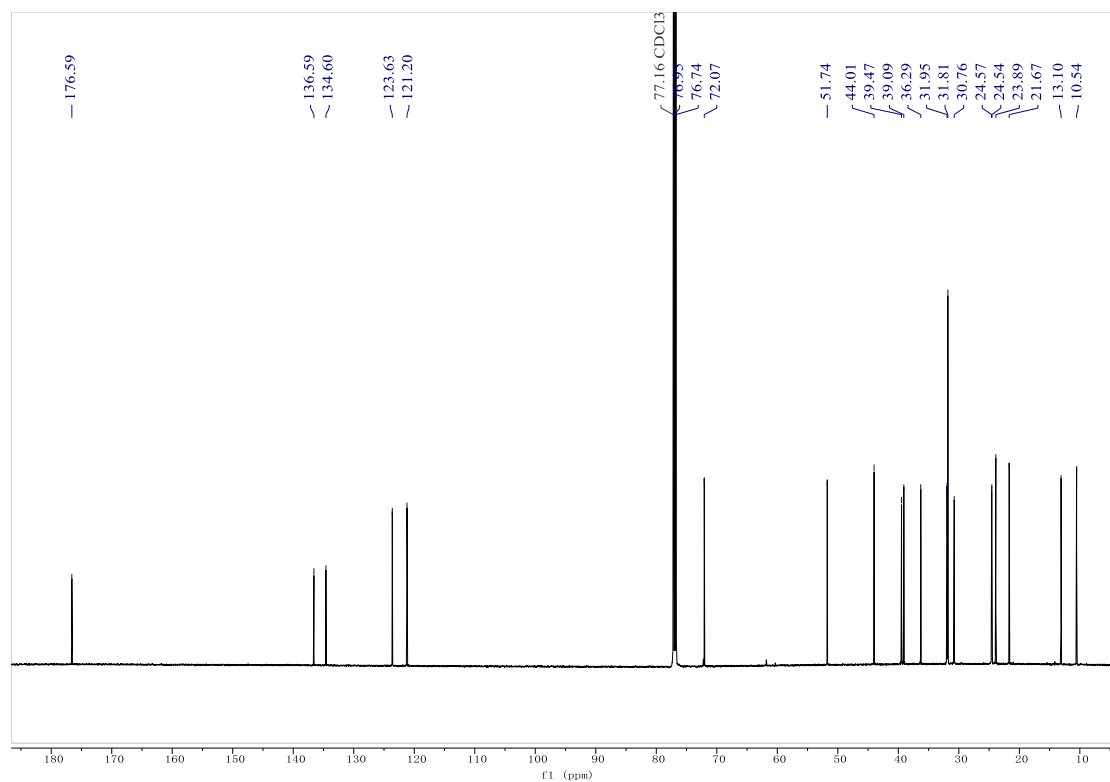

**Figure S40.** <sup>13</sup>C-NMR spectrum of bioflorante A (**5**) in CDCl<sub>3</sub>



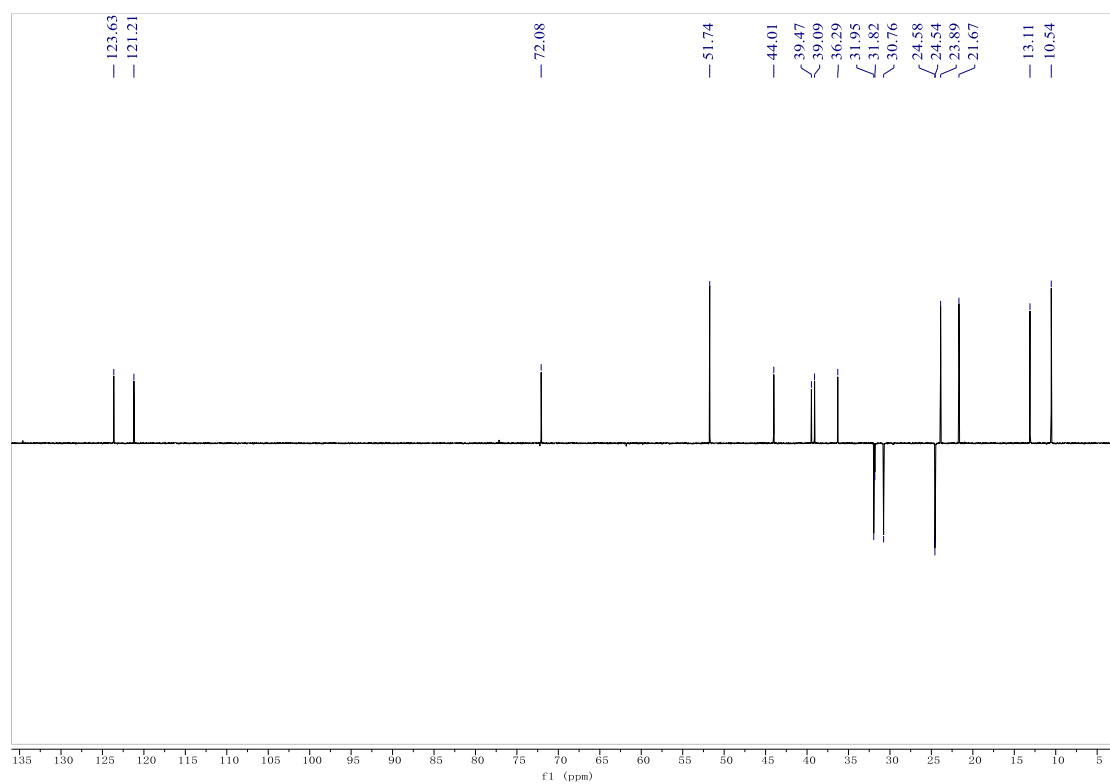

**Figure S41.** DEPT 135° spectrum of bioflorante A (**5**) in CDCl<sub>3</sub>

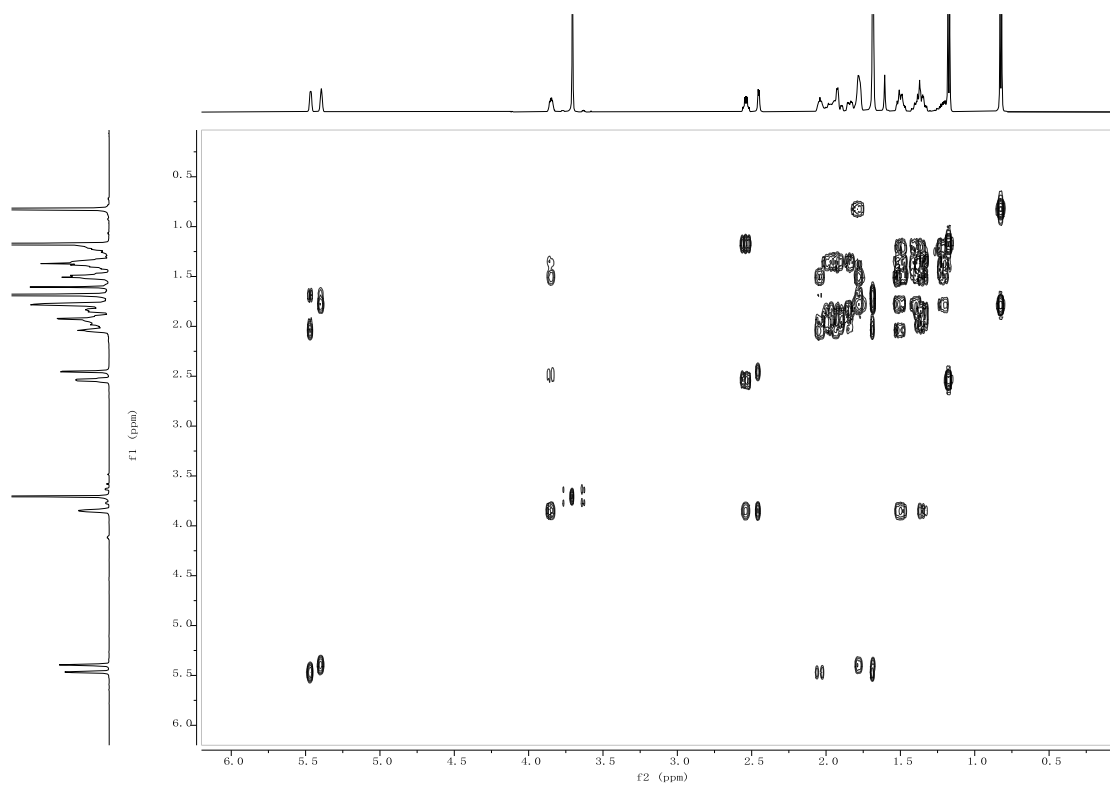

**Figure S42.** <sup>1</sup>H-<sup>1</sup>H COSY spectrum of bioflorante A (**5**) in CDCl<sub>3</sub>

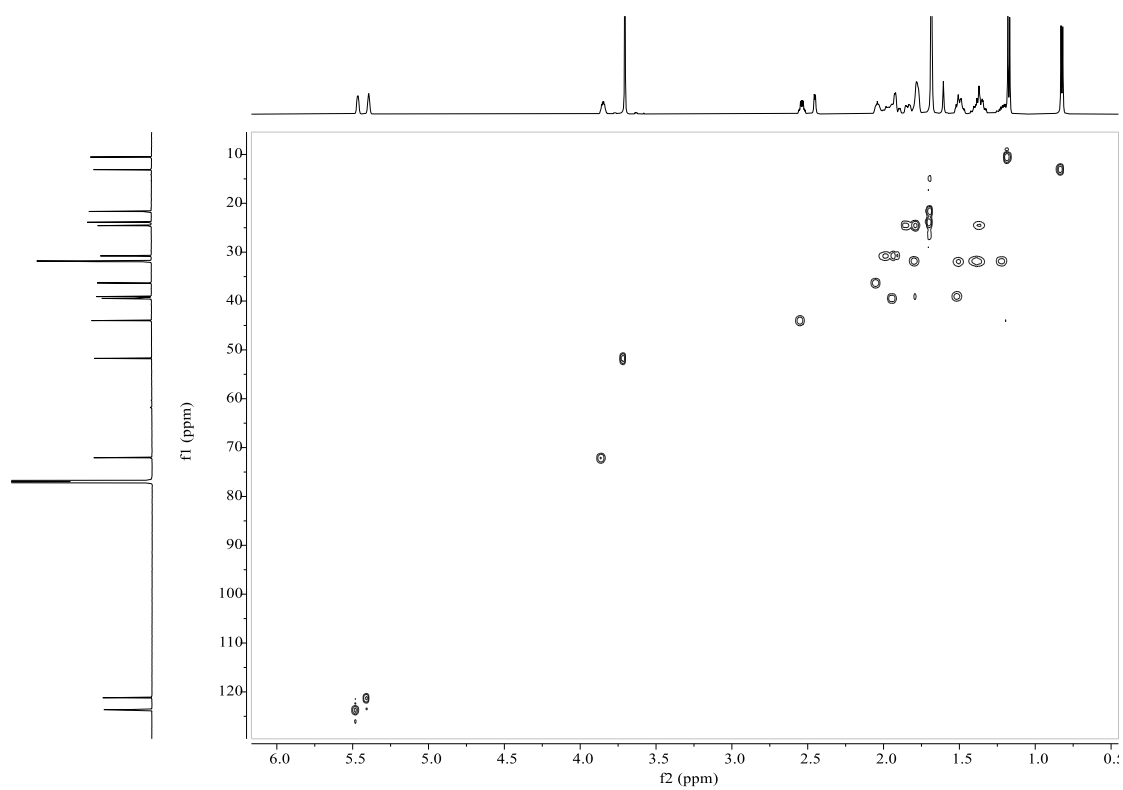

**Figure S43.** HSQC spectrum of bioflorante A (**5**) in CDCl<sub>3</sub>

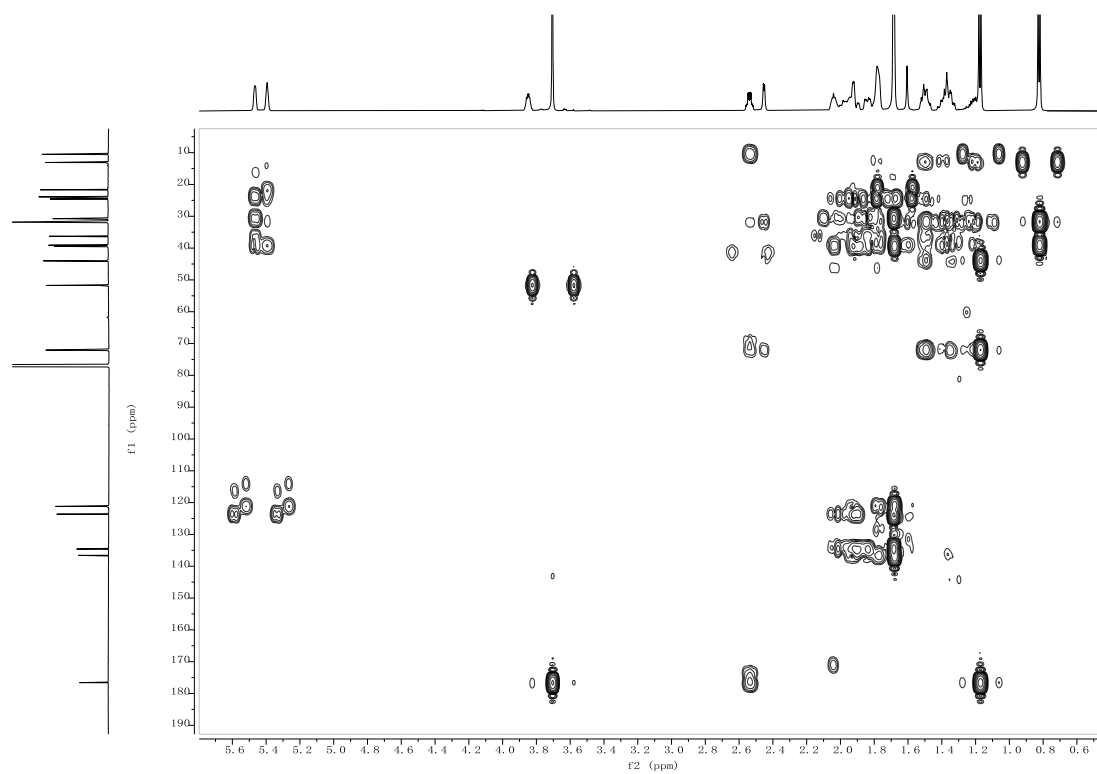

**Figure S44.** HMBC spectrum of bioflorante A (**5**) in CDCl<sub>3</sub>

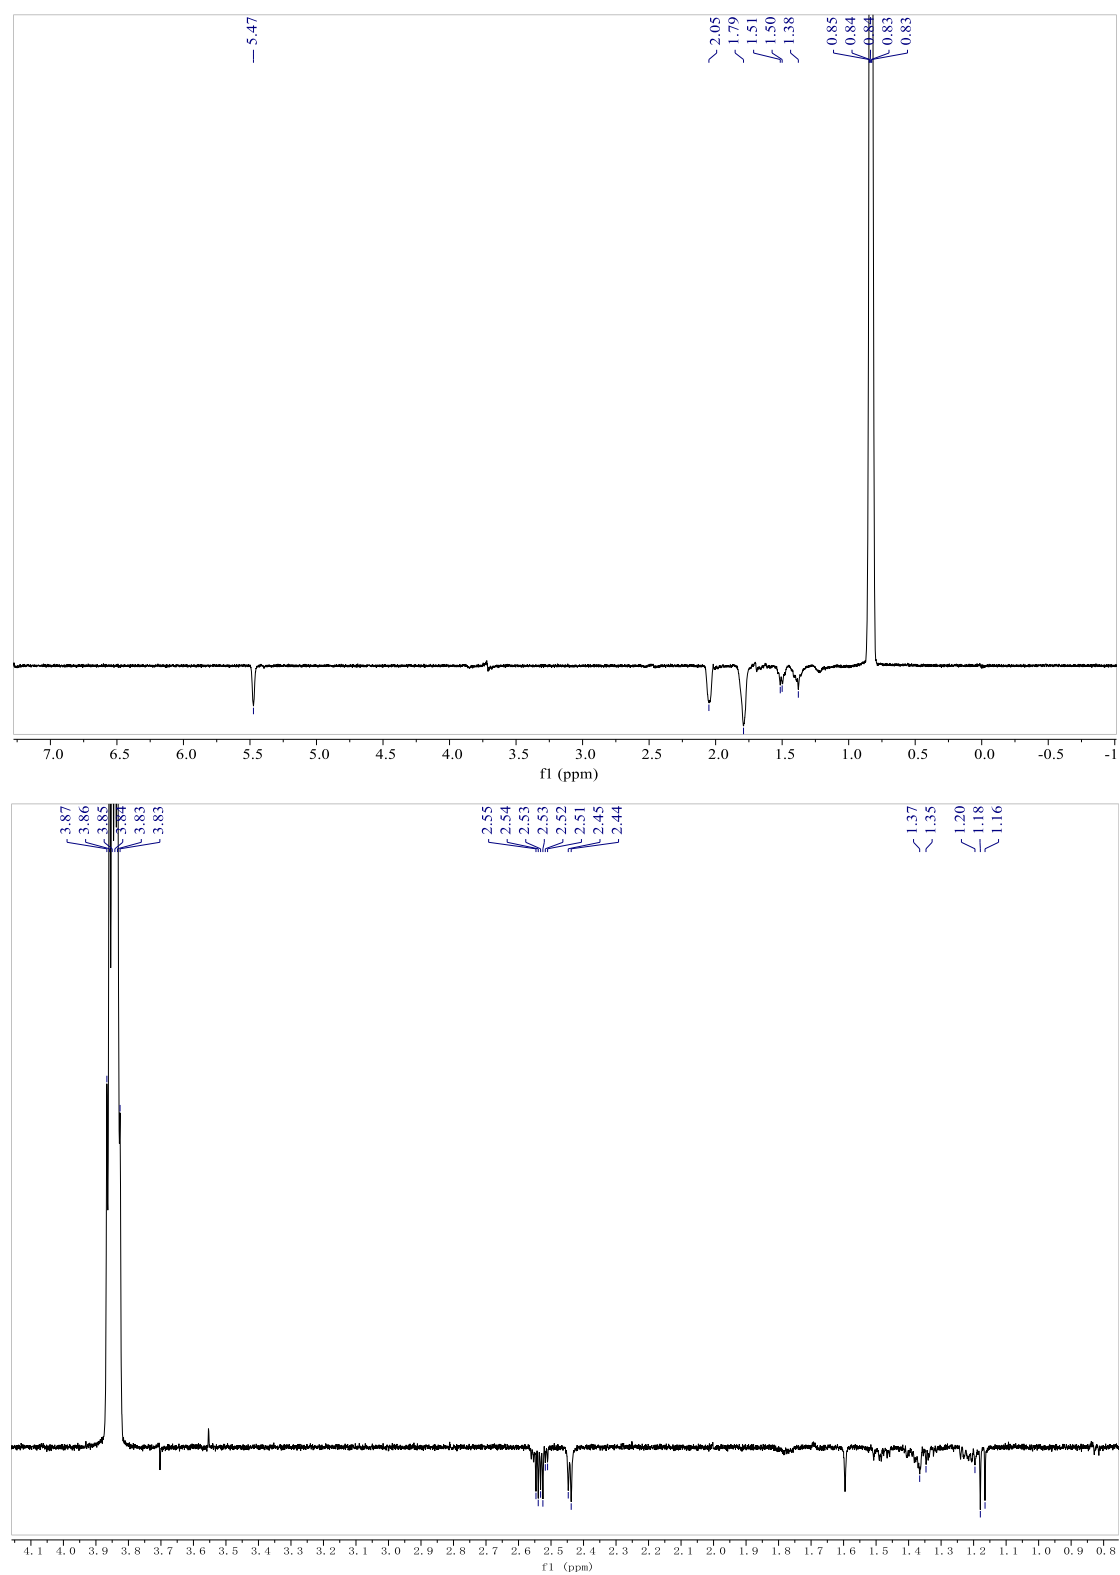

**Figure S45.** NOESY spectrum of bioflorante A (**5**) in CDCl<sub>3</sub>

## 10. Spectroscopic data for biofloranate B (6)

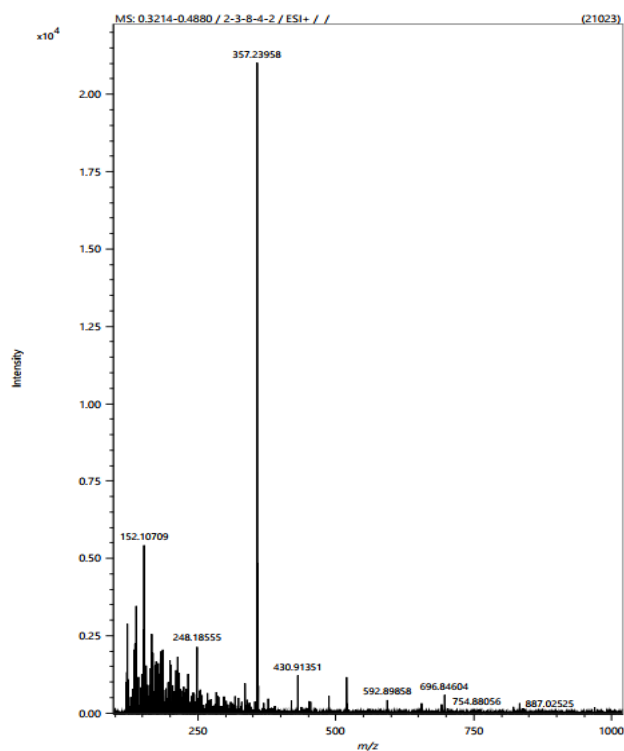

Figure S46. HRESIMS spectrum of biofloranate B (6)

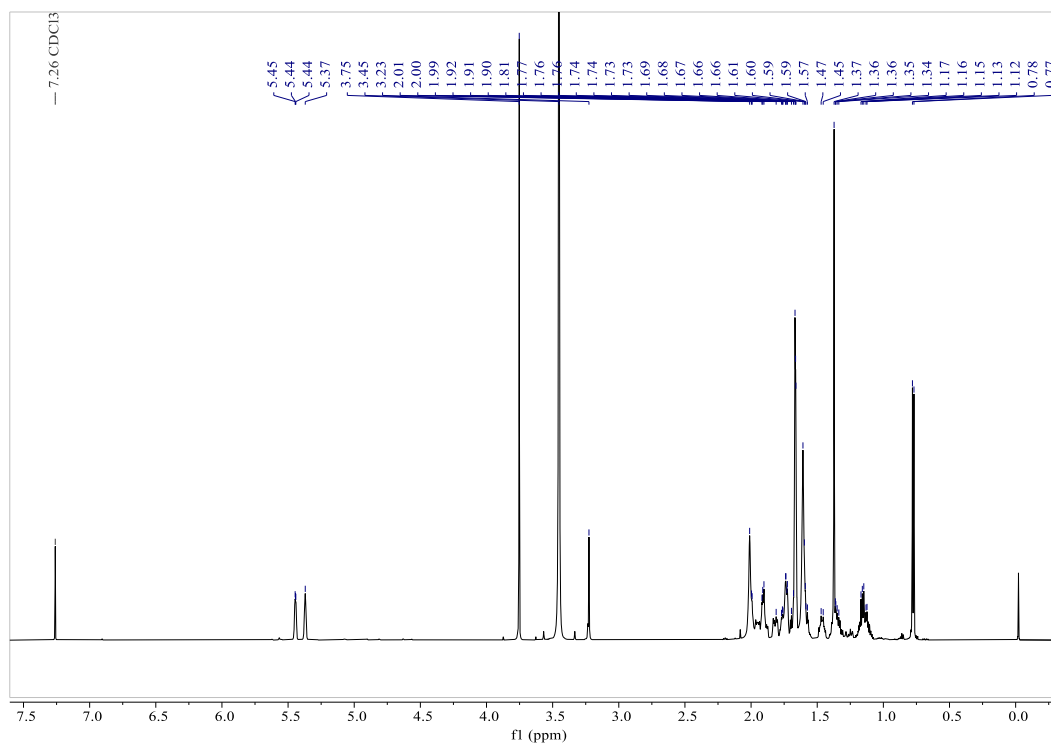

Figure S47.  $^1\text{H}$ -NMR spectrum of biofloranate B (6) in  $\text{CDCl}_3$

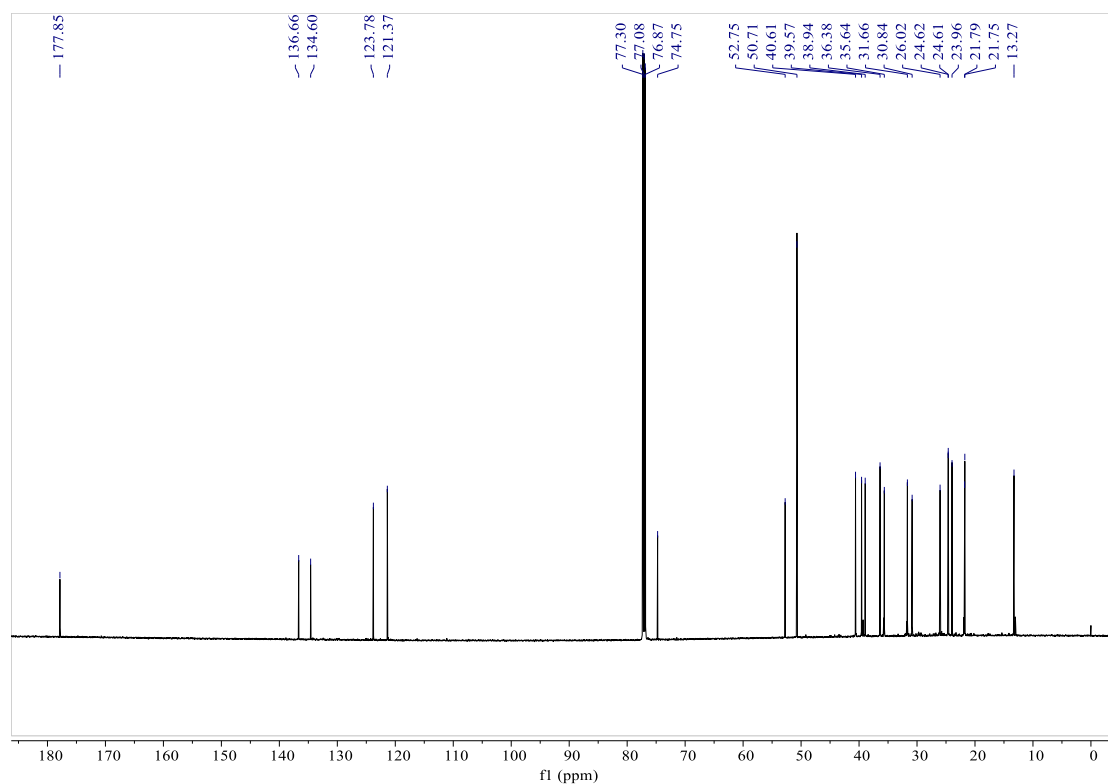

**Figure S48.**  $^{13}\text{C}$ -NMR spectrum of bioflorante B (**6**) in  $\text{CDCl}_3$

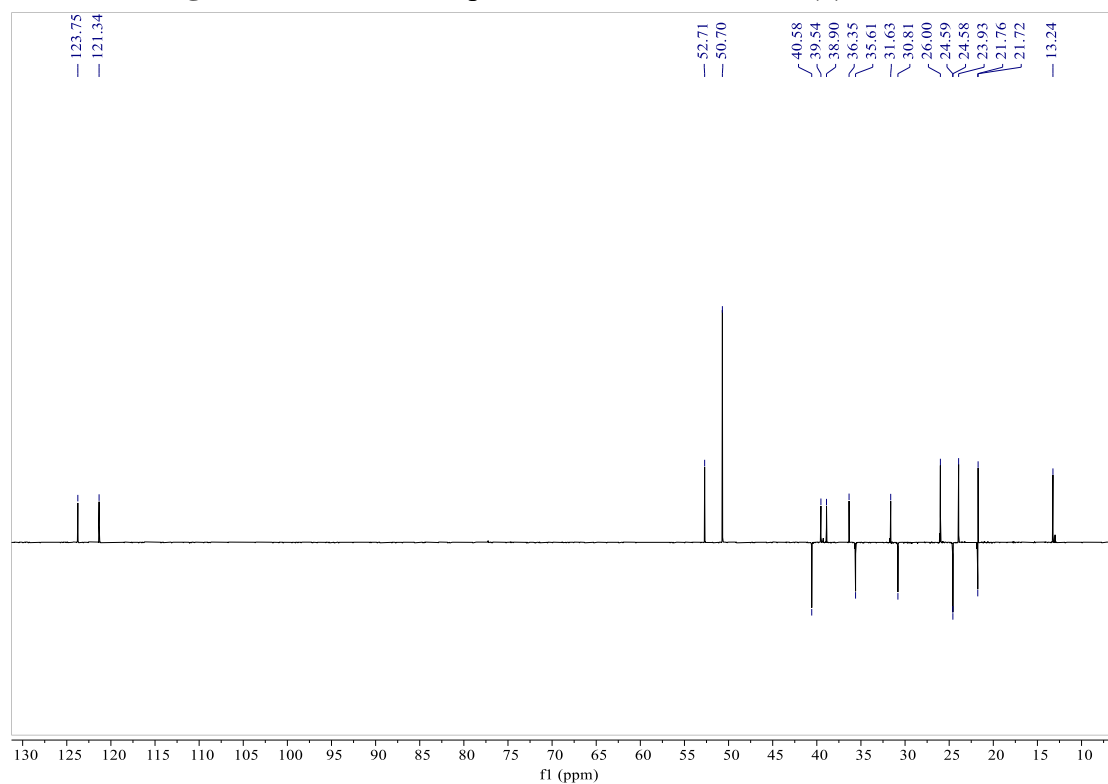

**Figure S49.** DEPT  $135^\circ$  spectrum of bioflorante B (**6**) in  $\text{CDCl}_3$

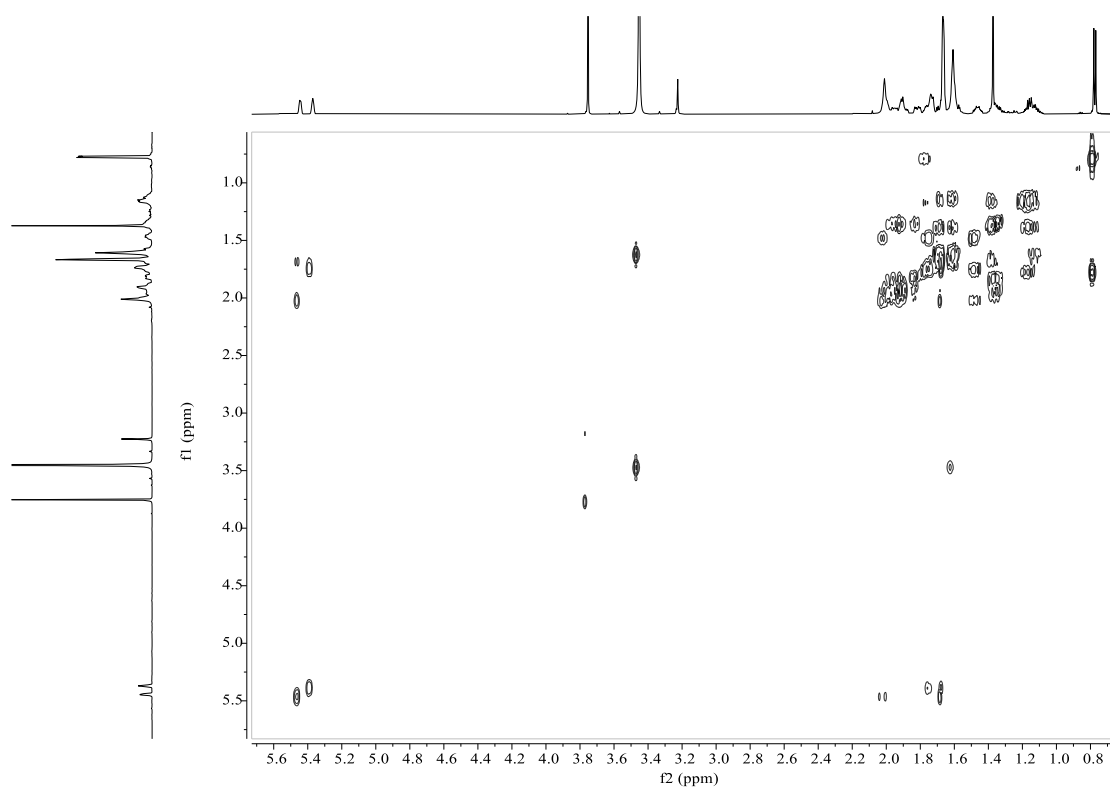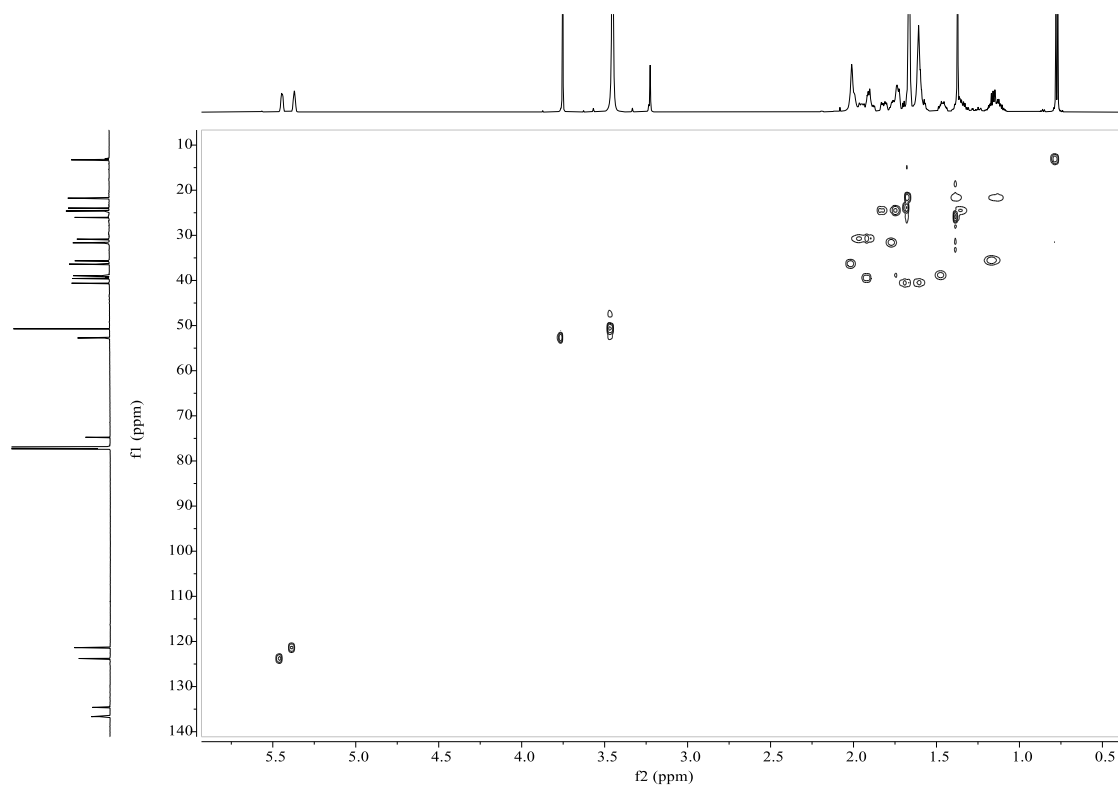

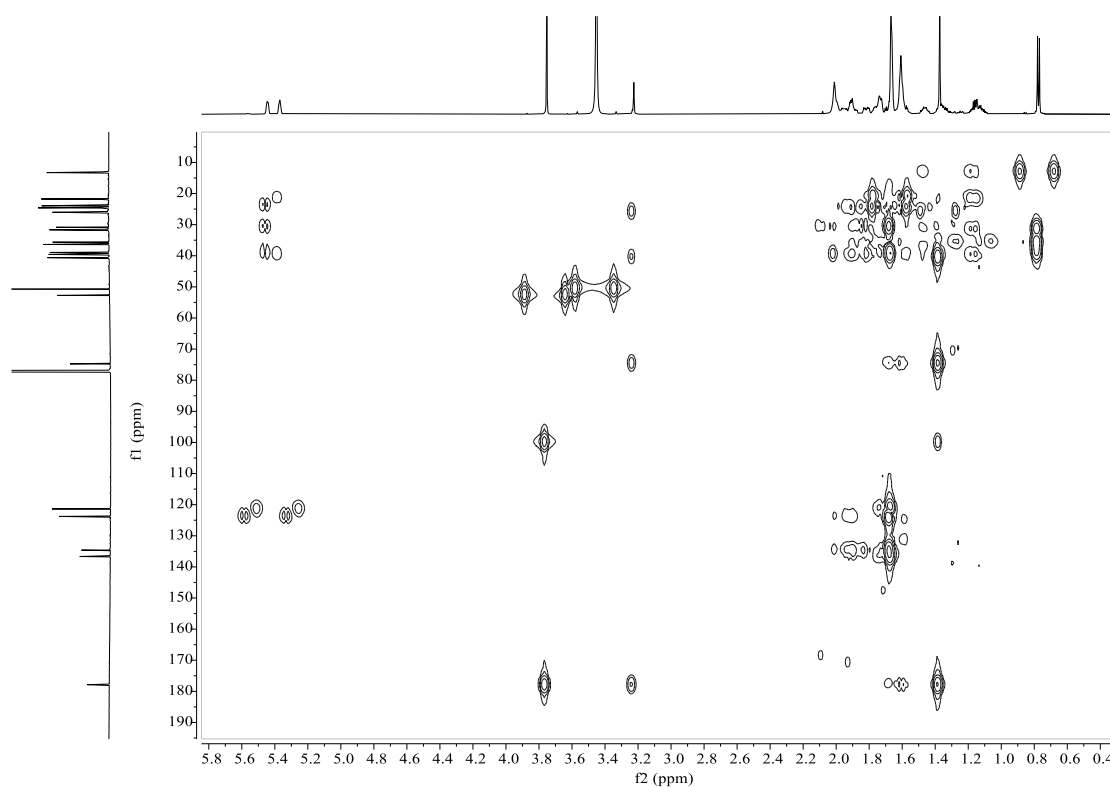

**Figure S52.** HMBC spectrum of bioflorane B (**6**) in  $\text{CDCl}_3$

## 11. Spectroscopic data for bioflorane C (**7**)

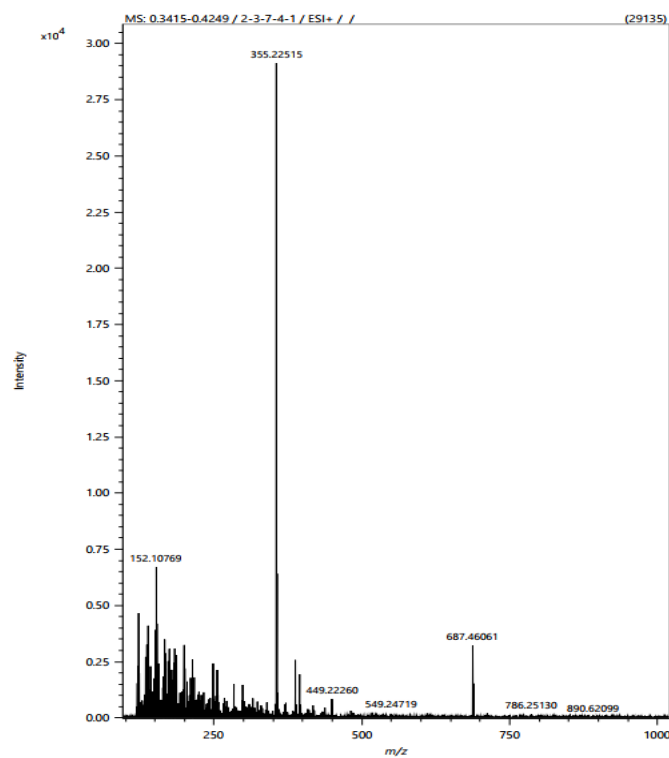

**Figure S53.** HRESIMS spectrum of bioflorane C (**7**)

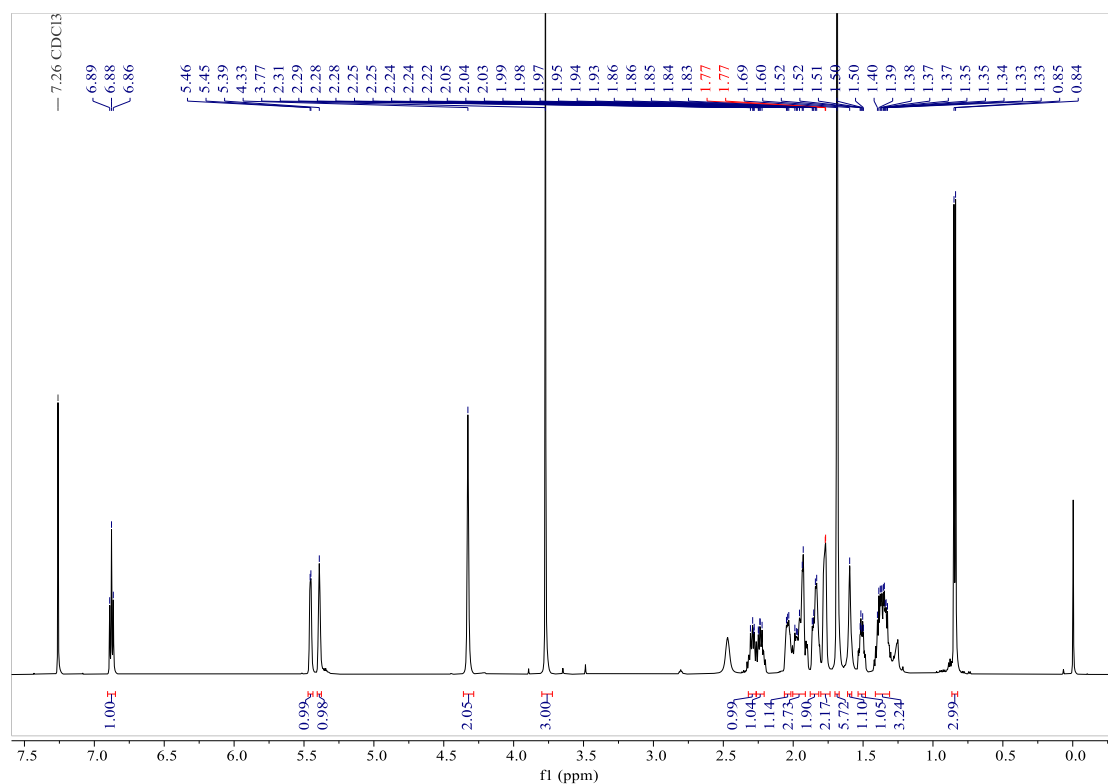

**Figure S54.** <sup>1</sup>H-NMR spectrum of bioflorante C (7) in CDCl<sub>3</sub>

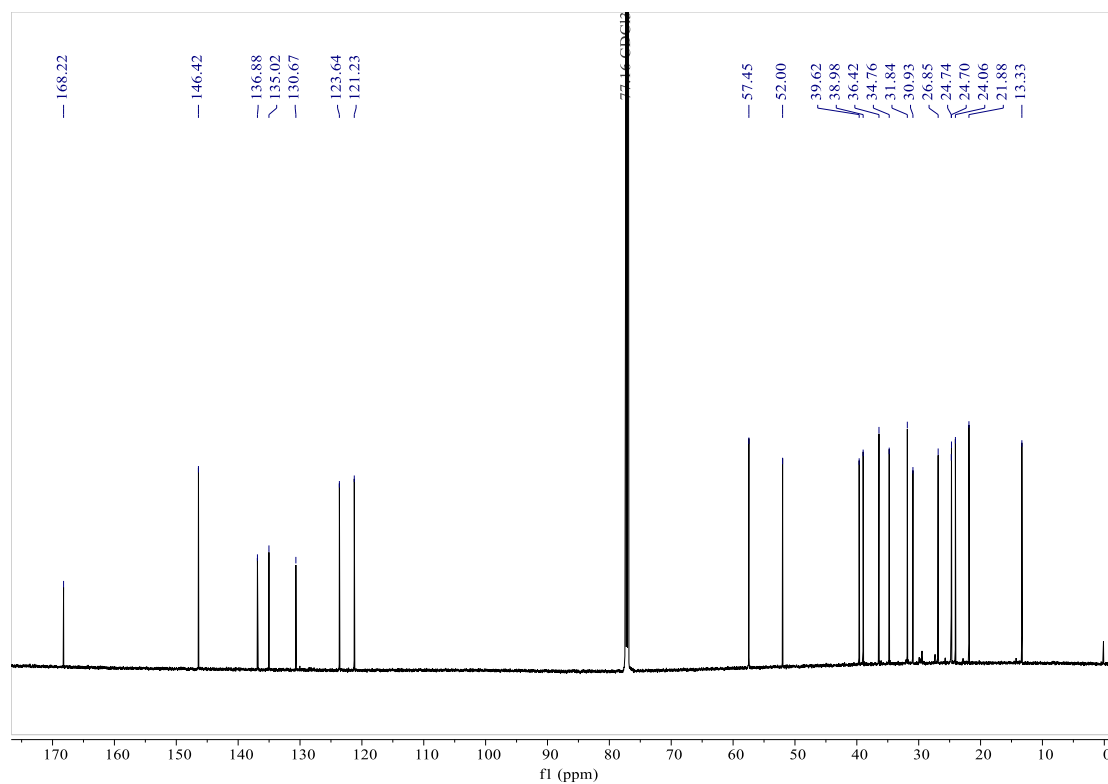

**Figure S55.** <sup>13</sup>C-NMR spectrum of bioflorante C (7) in CDCl<sub>3</sub>



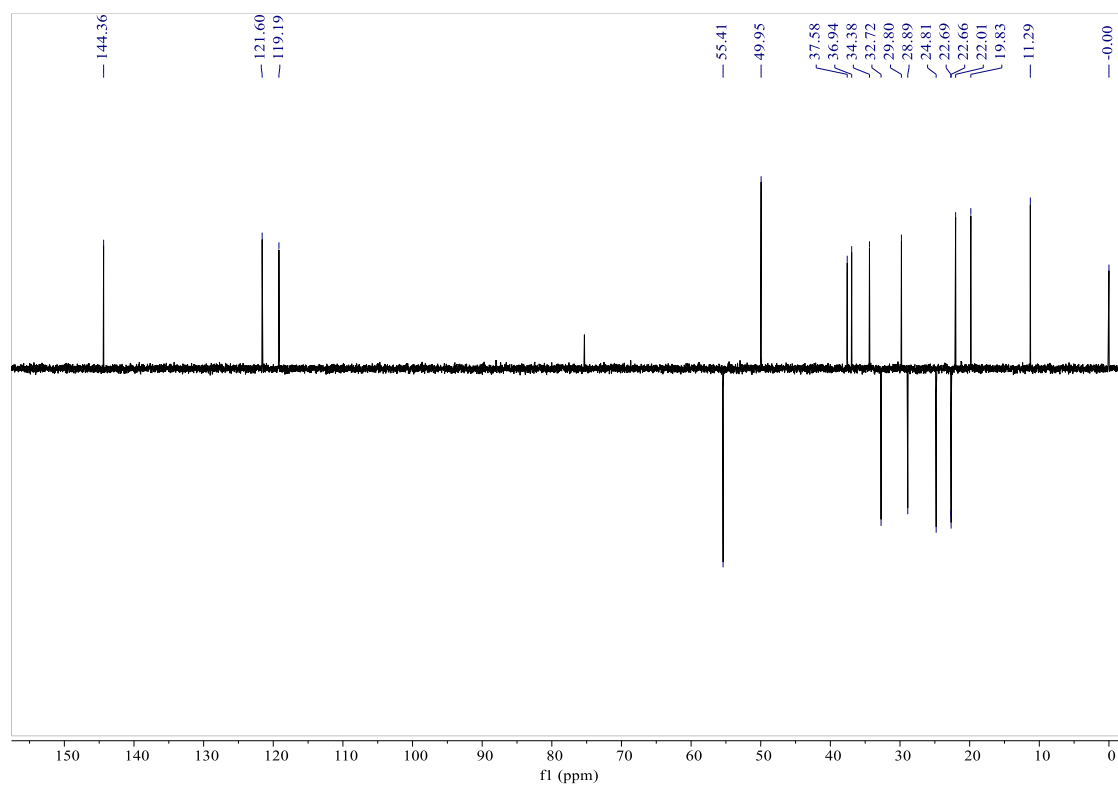

**Figure S56.** DEPT 135° spectrum of bioflorante C (7) in CDCl<sub>3</sub>

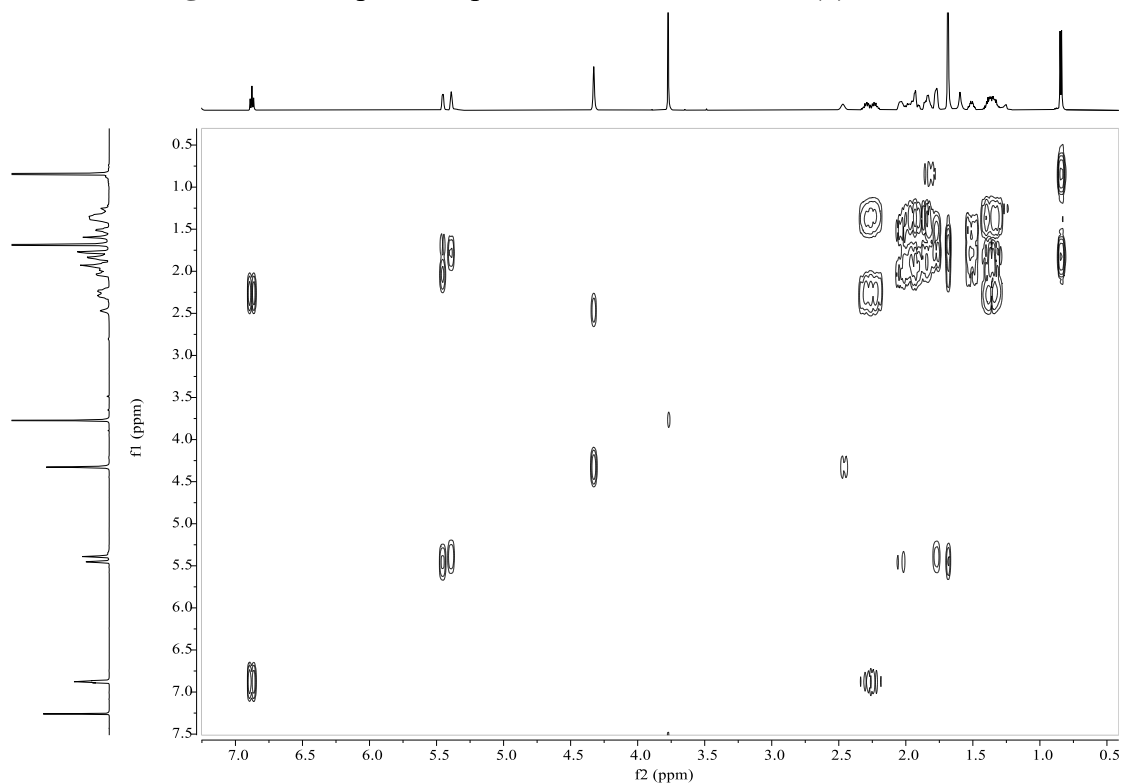

**Figure S57.** <sup>1</sup>H-<sup>1</sup>H COSY spectrum of bioflorante C (7) in CDCl<sub>3</sub>

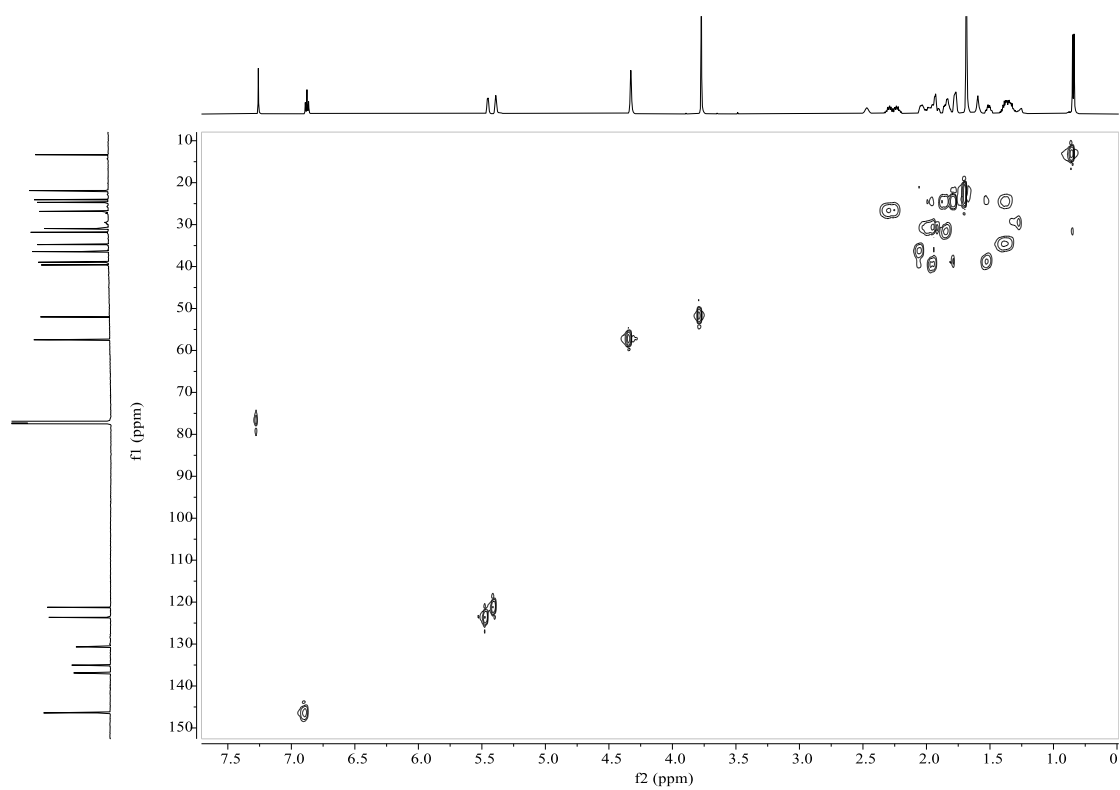

**Figure S58.** HSQC spectrum of bioflorinate C (7) in  $\text{CDCl}_3$

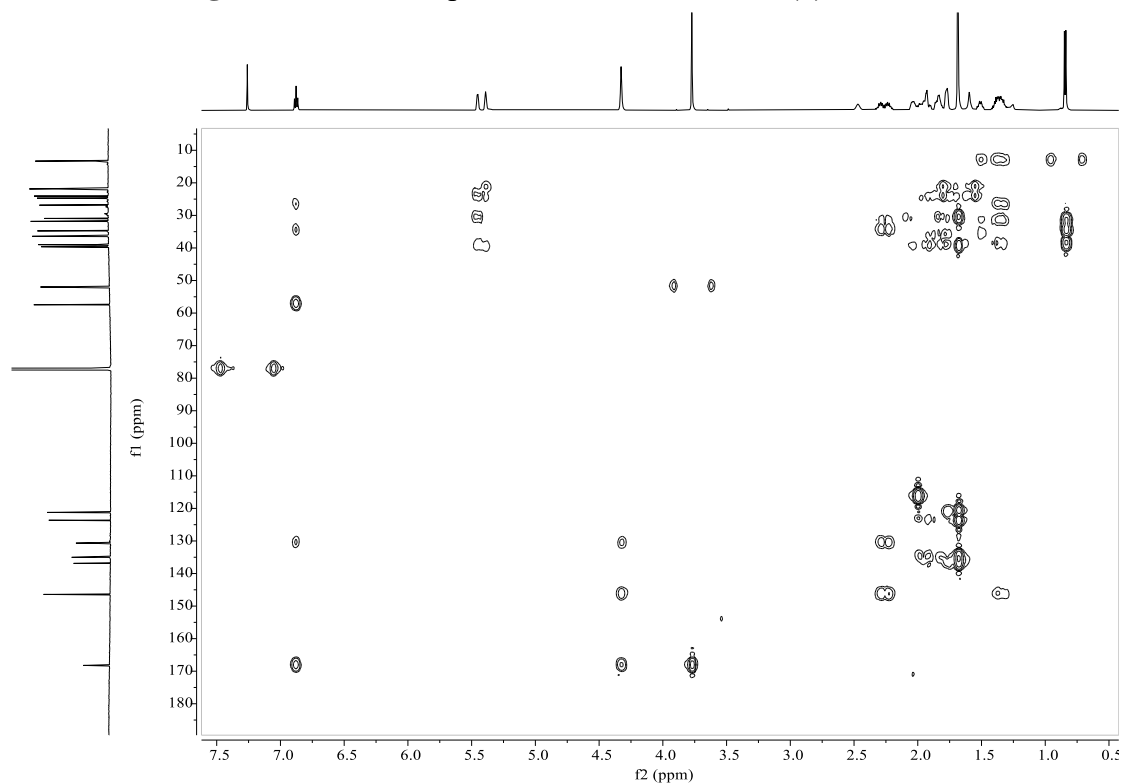

**Figure S59.** HMBC spectrum of bioflorinate C (7) in  $\text{CDCl}_3$

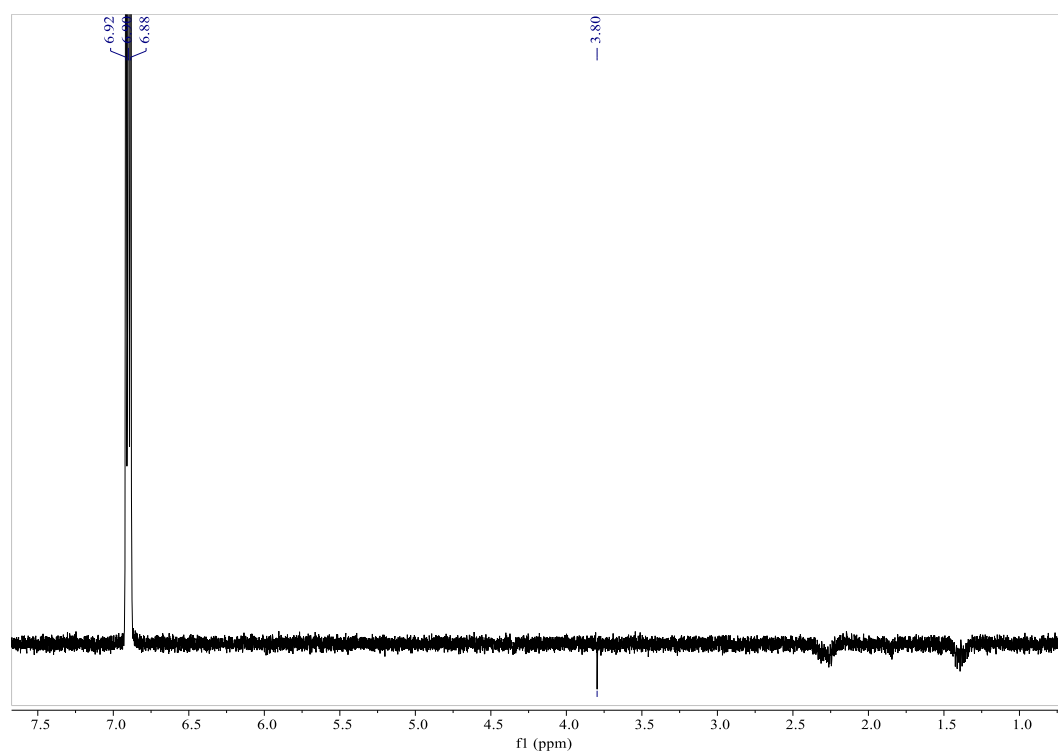

**Figure S60.** NOESY spectrum of bioflorant C (7) in CDCl<sub>3</sub>

## 12. Spectroscopic data for bioflorant D (8)

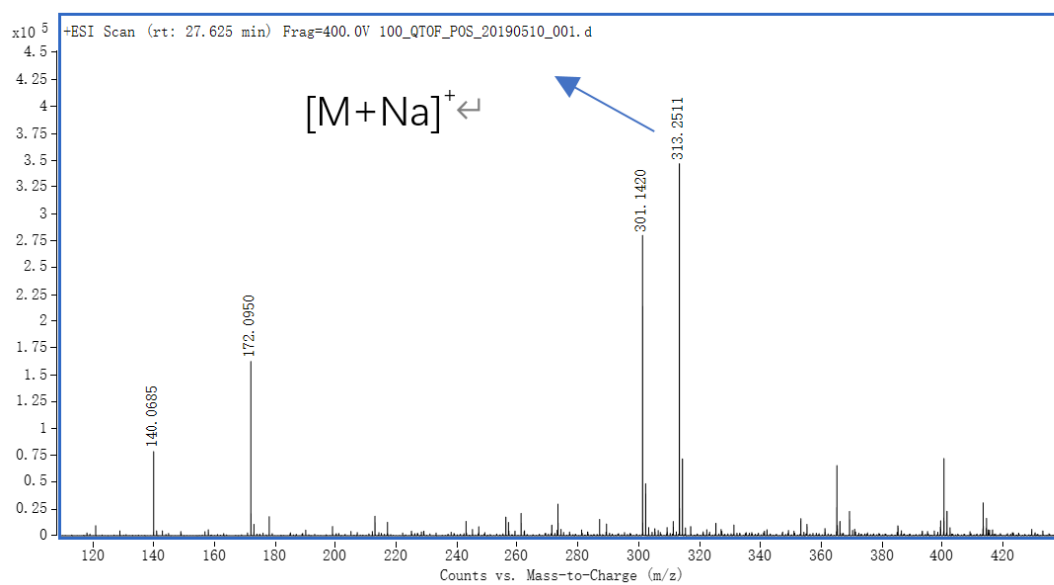

**Figure S61.** HRESIMS spectrum of bioflorant D (8)

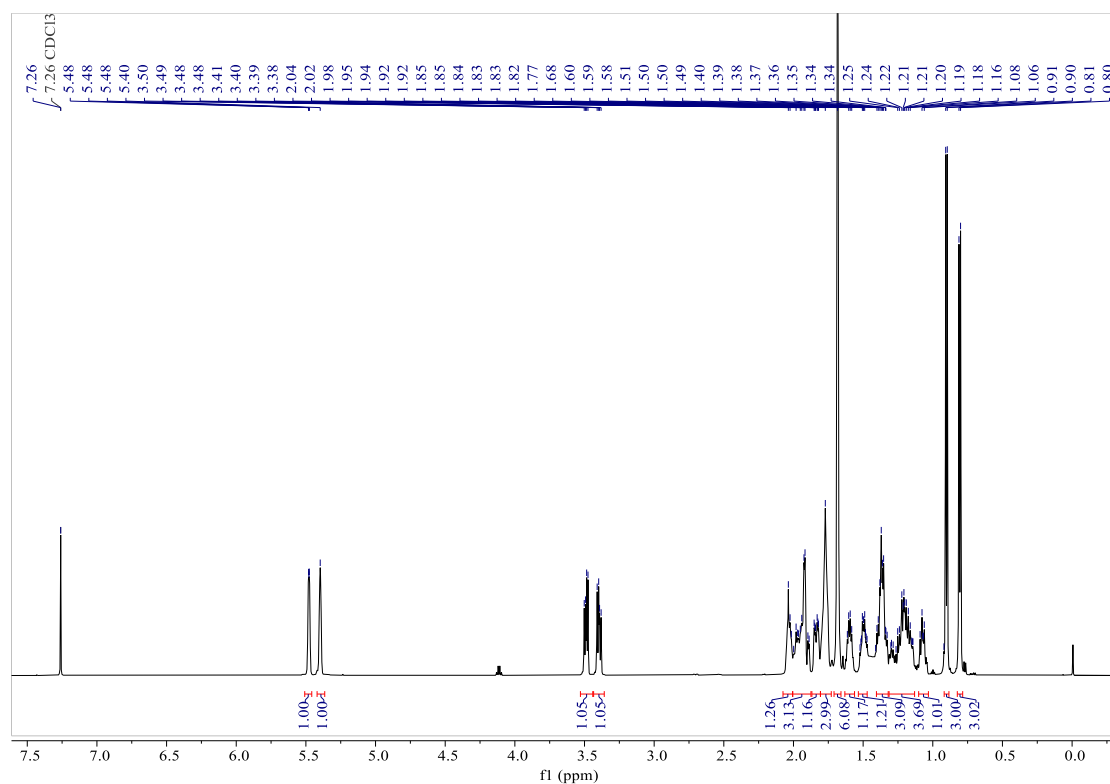

**Figure S62.**  $^1\text{H}$ -NMR spectrum of bioflorante D (**8**) in  $\text{CDCl}_3$

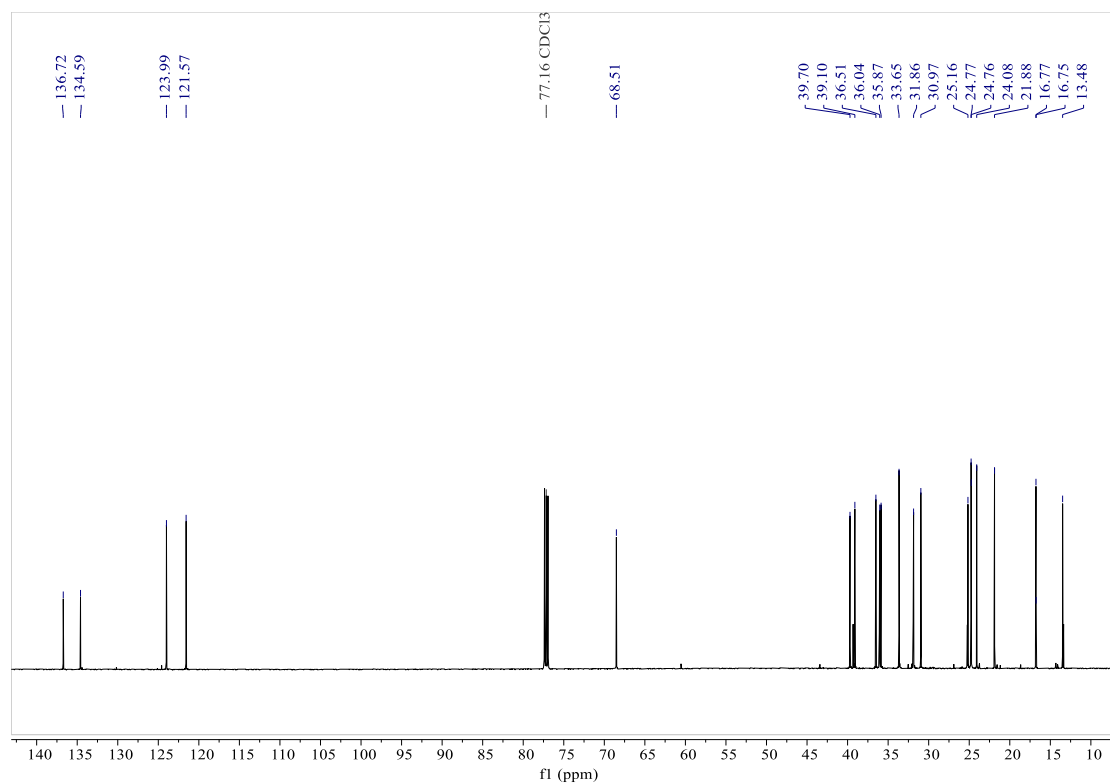

**Figure S63.**  $^{13}\text{C}$ -NMR spectrum of bioflorante D (**8**) in  $\text{CDCl}_3$

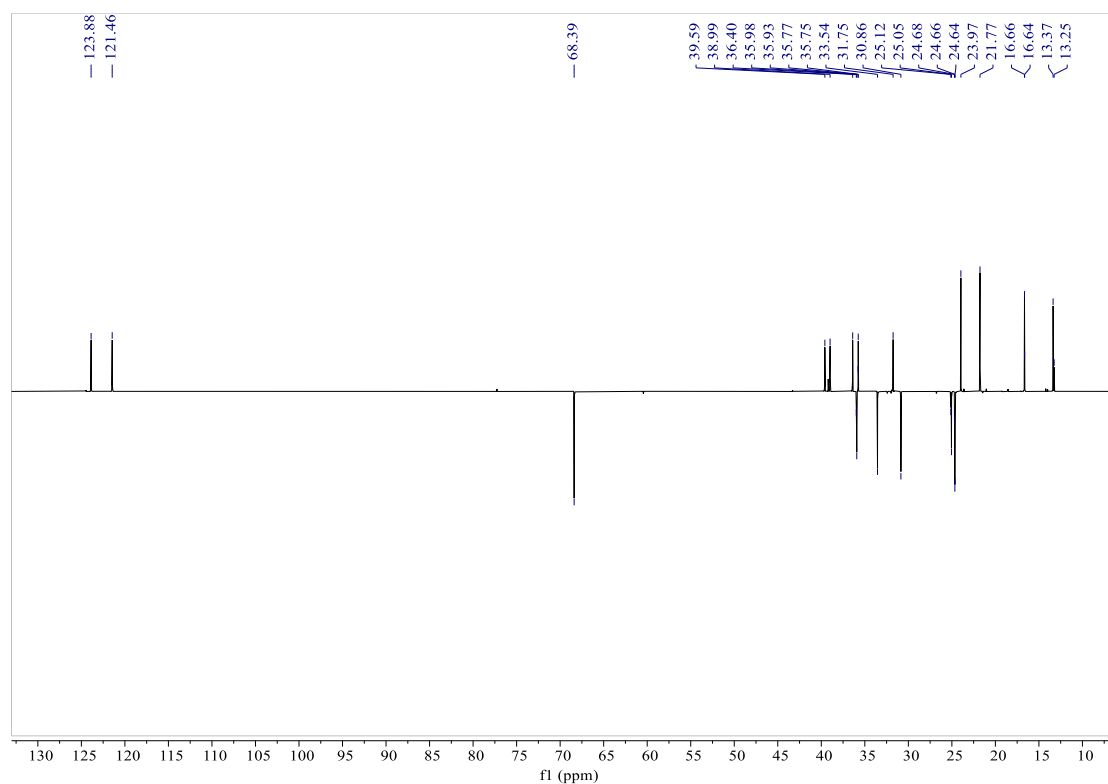

**Figure S64.** DEPT 135° spectrum of bioflorante D (**8**) in CDCl<sub>3</sub>

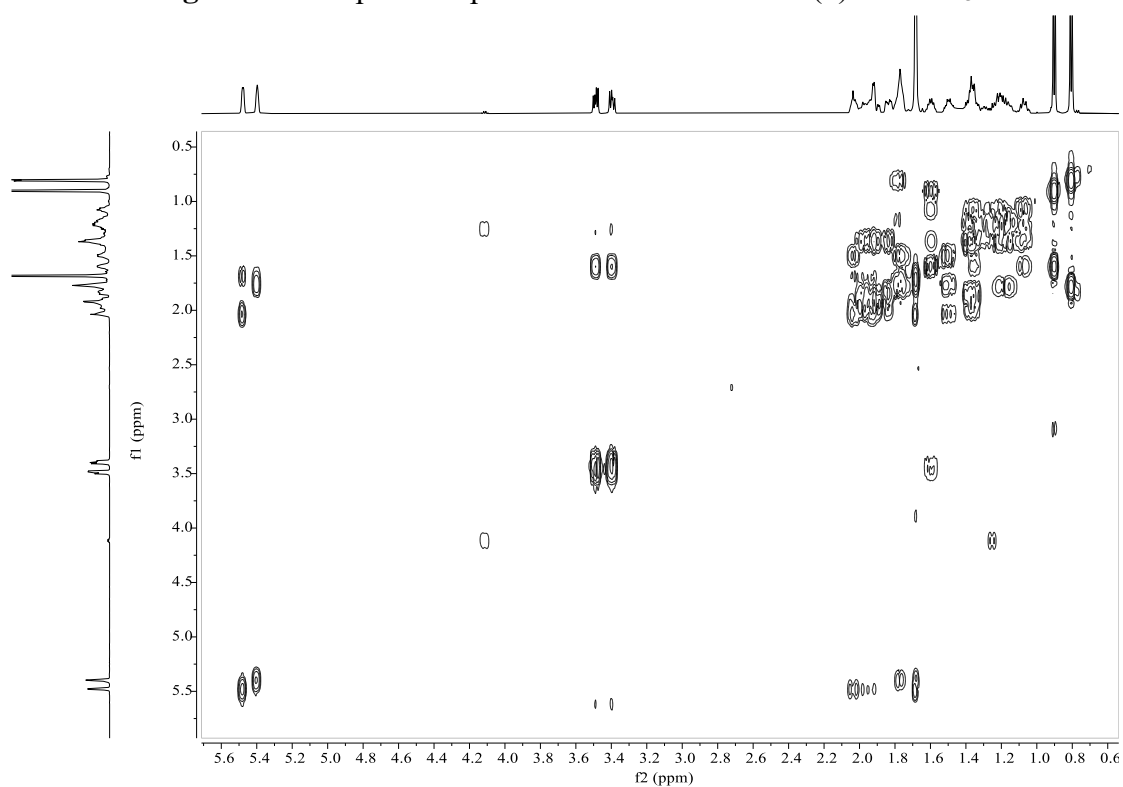

**Figure S65.** <sup>1</sup>H-<sup>1</sup>H COSY spectrum of bioflorante D (**8**) in CDCl<sub>3</sub>

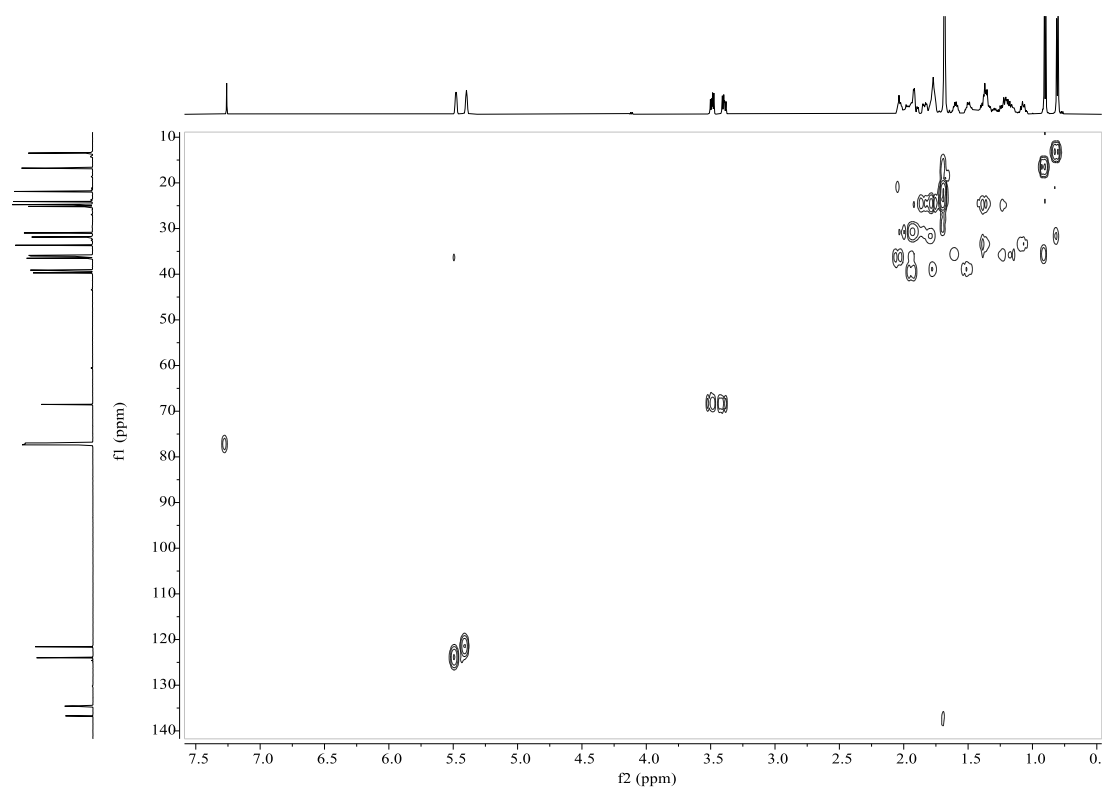

**Figure S66.** HSQC spectrum of biofloranate D (**8**) in  $\text{CDCl}_3$

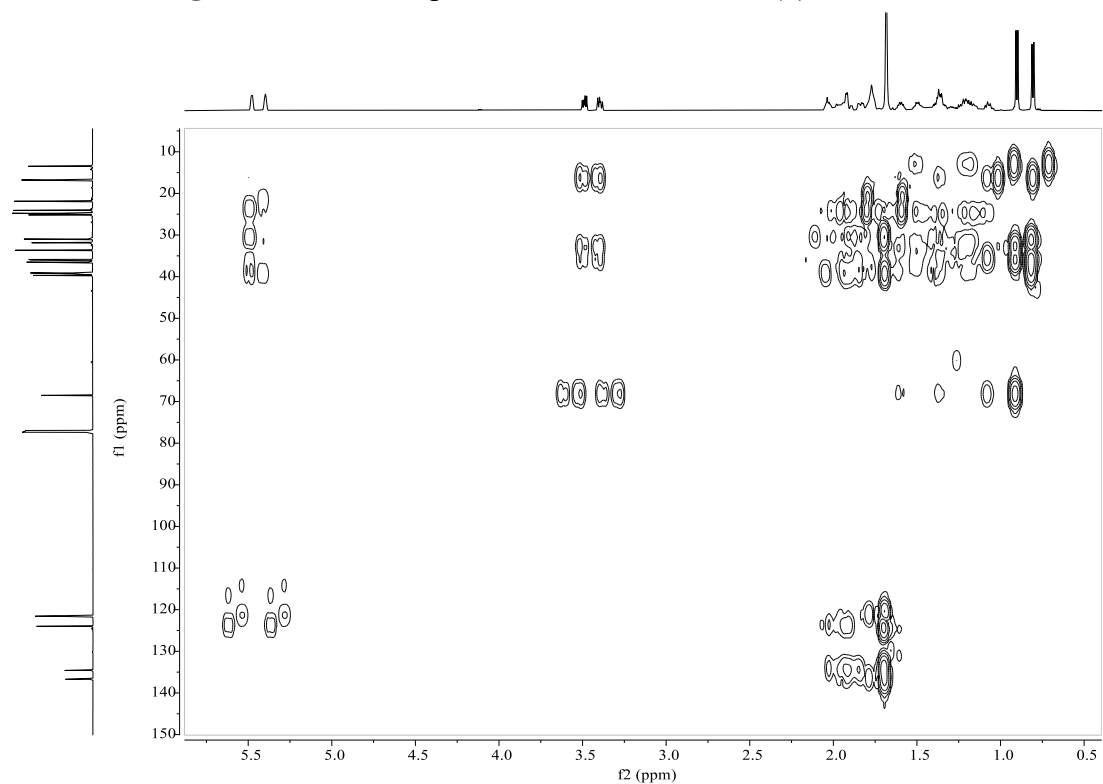

**Figure S67.** HMBC spectrum of biofloranate D (**8**) in  $\text{CDCl}_3$

### 13. Spectroscopic data for euplexaurene D (9)

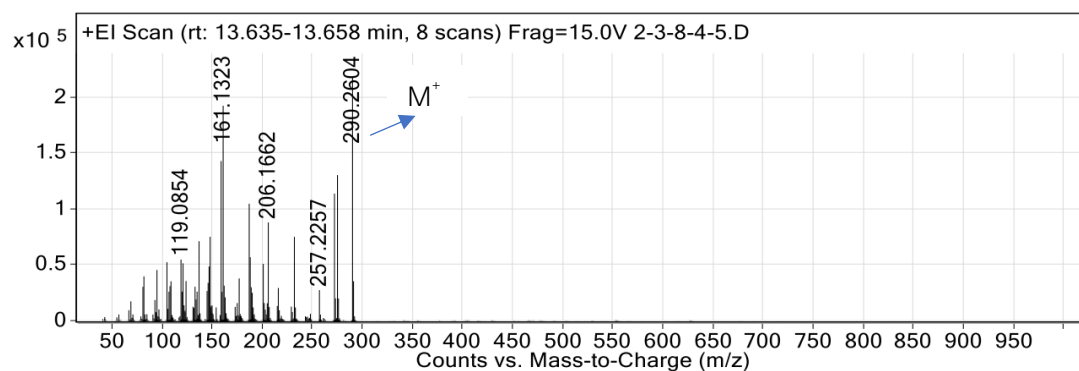

**Figure S68.** HRESIMS spectrum of euplexaurene D (9)

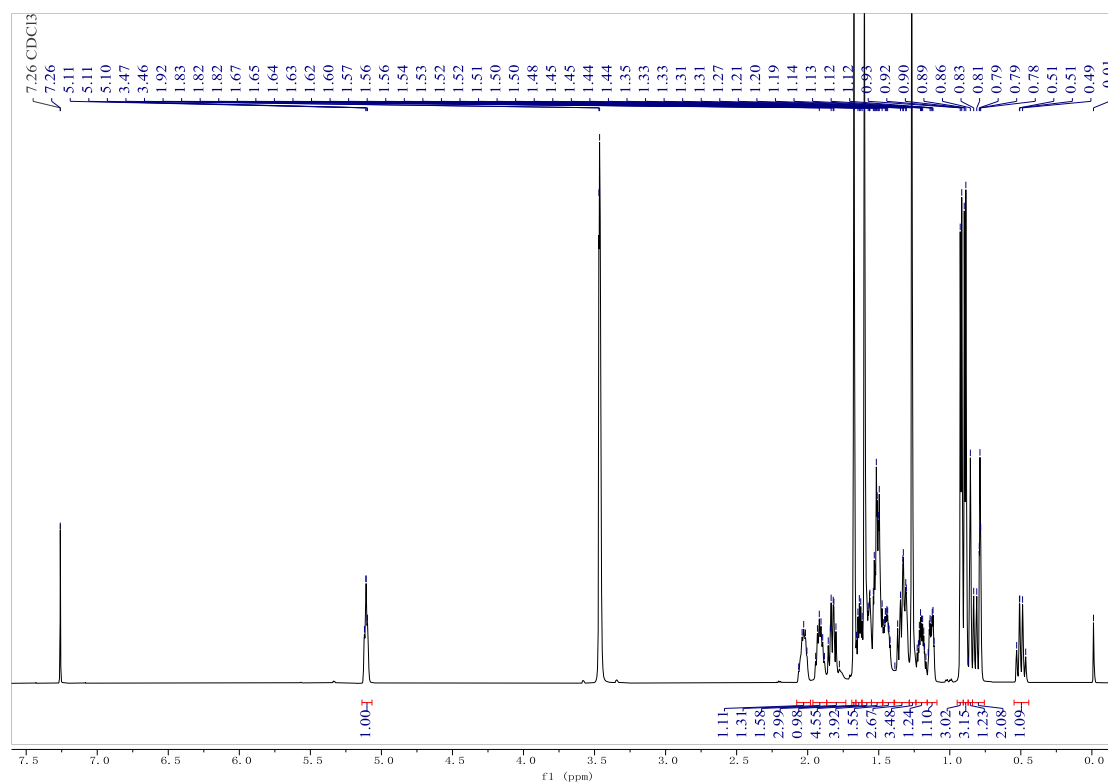

**Figure S69.**  $^1\text{H}$ -NMR spectrum of euplexaurene D (9) in  $\text{CDCl}_3$

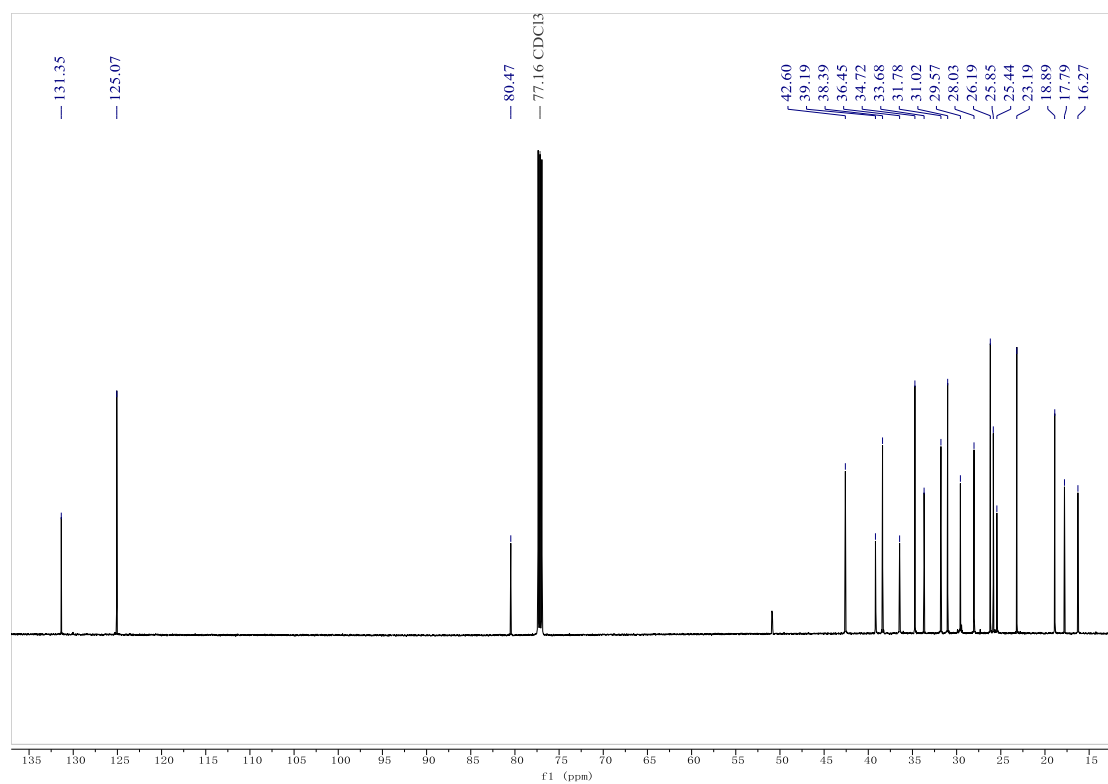

**Figure S70.** <sup>13</sup>C-NMR spectrum of euplexaurene D (9) in CDCl<sub>3</sub>

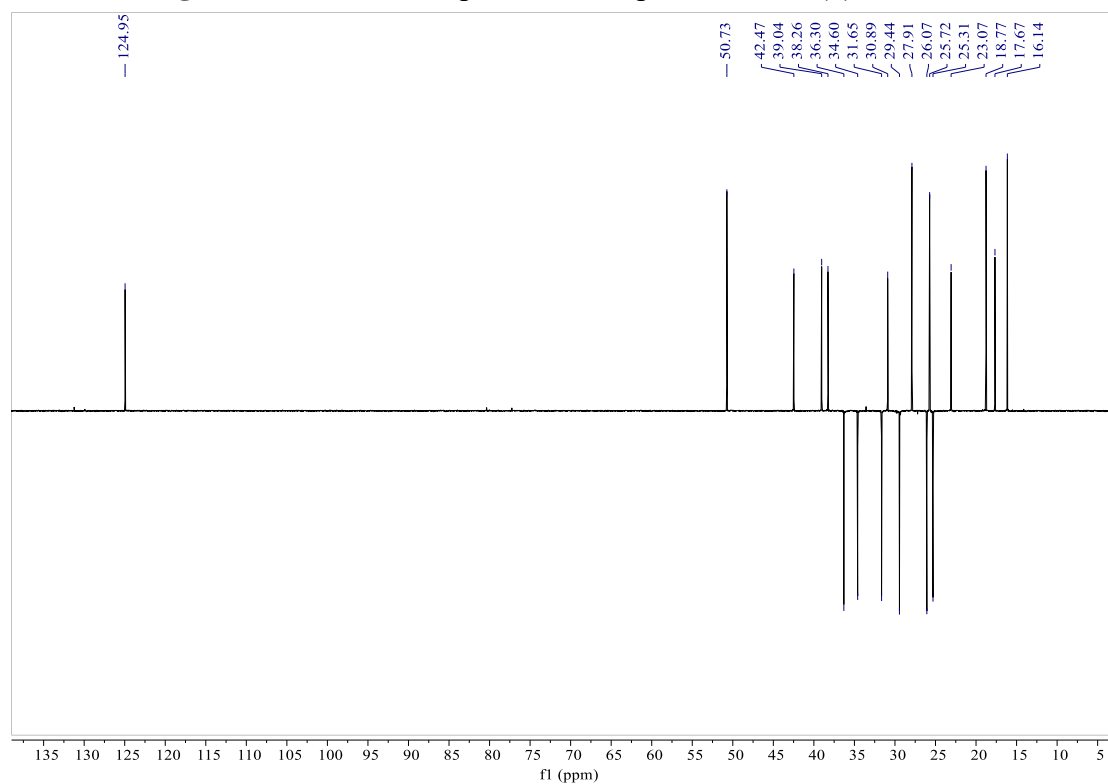

**Figure S71.** DEPT 135° spectrum of euplexaurene D (9) in CDCl<sub>3</sub>



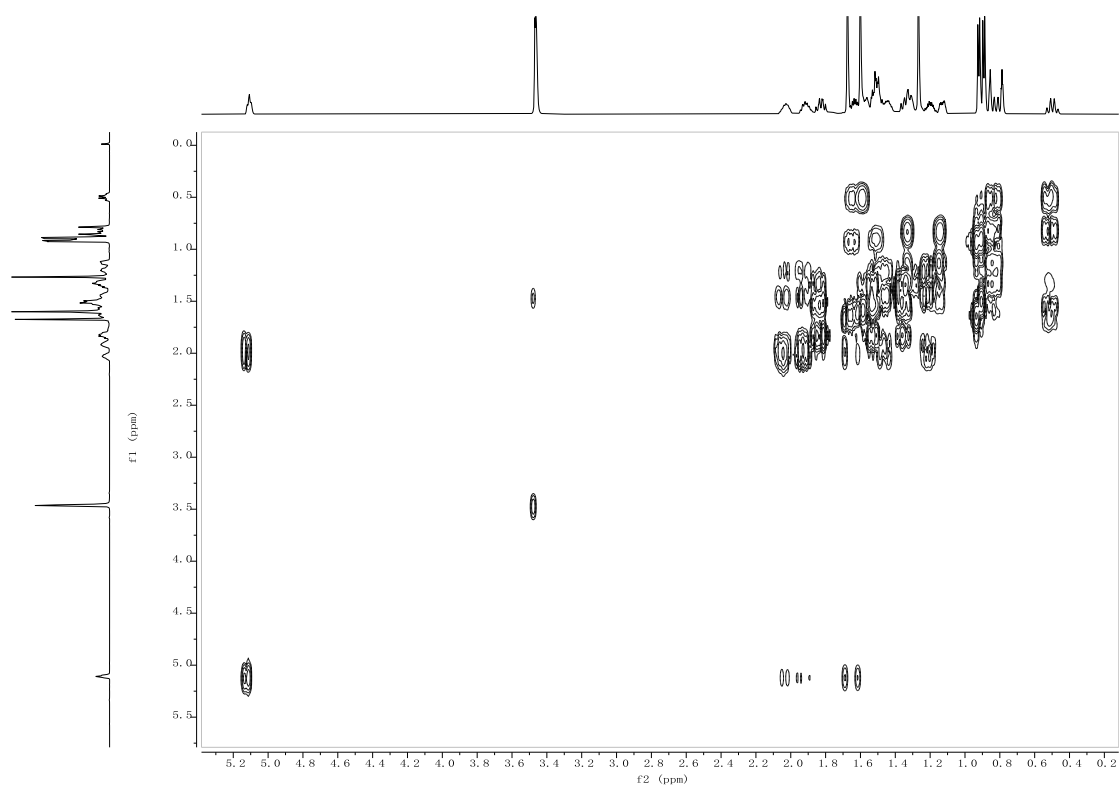

**Figure S72.**  $^1\text{H}$ - $^1\text{H}$  COSY spectrum of euplexaurene D (**9**) in  $\text{CDCl}_3$

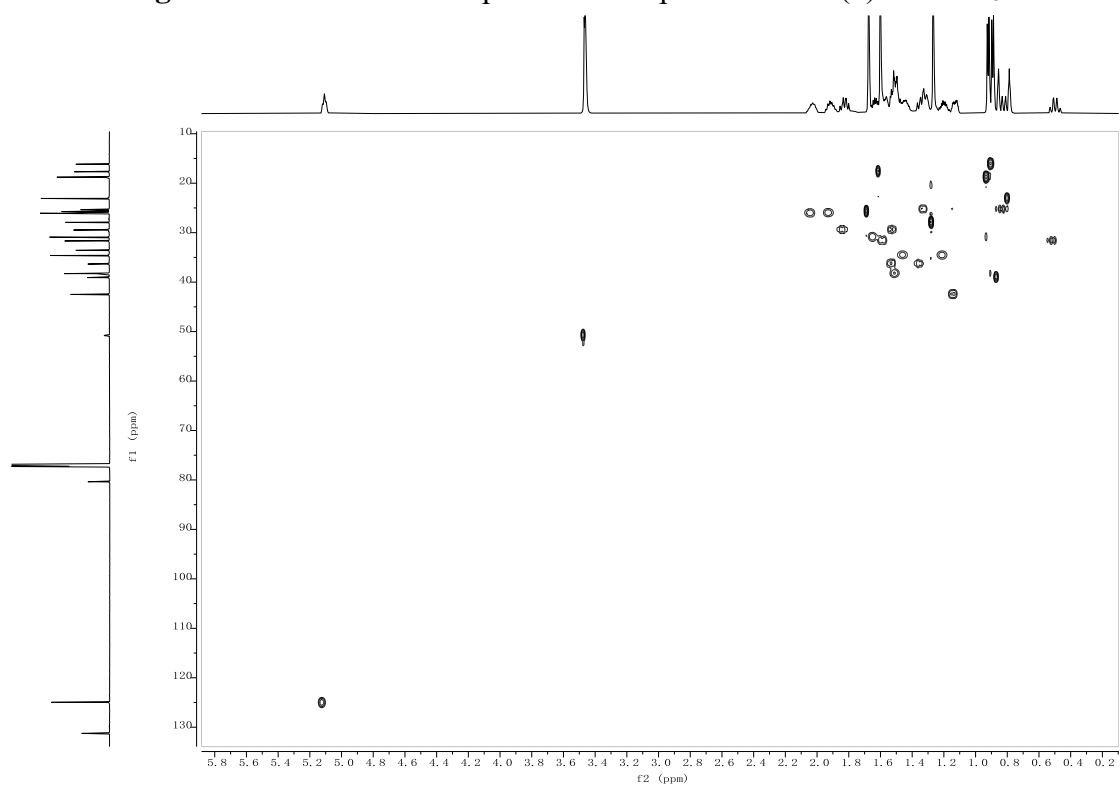

**Figure S73.** HSQC spectrum of euplexaurene D (**9**) in  $\text{CDCl}_3$

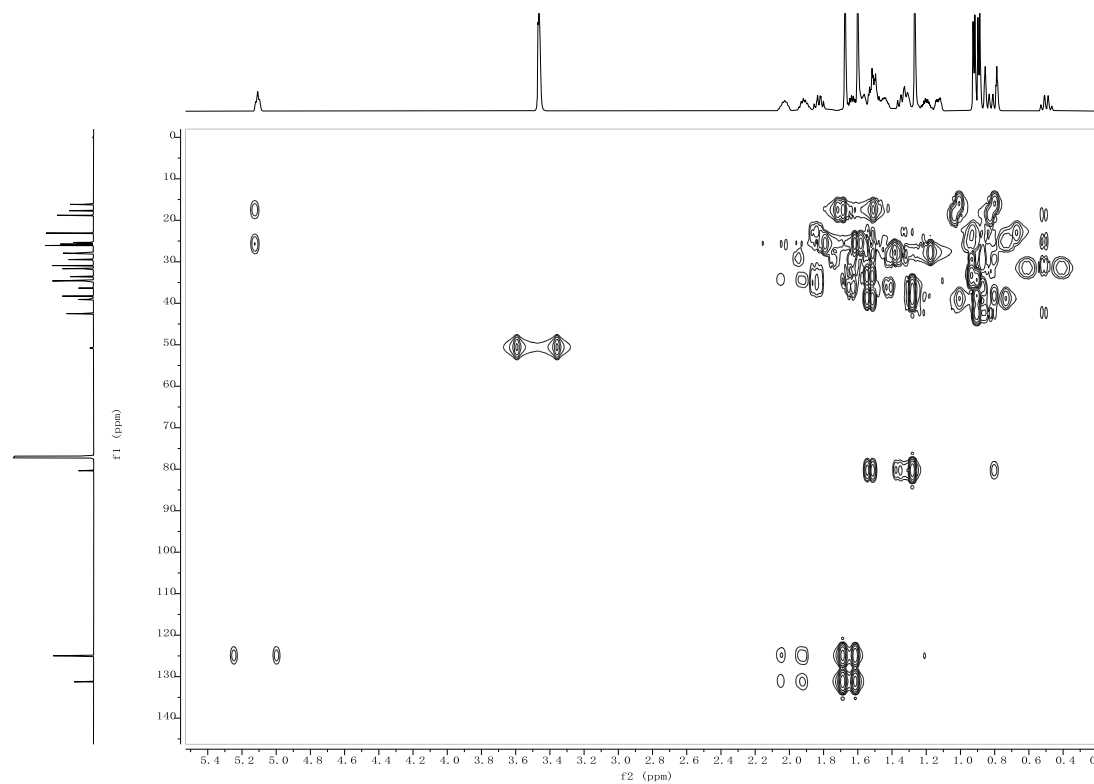

**Figure S74.** HMBC spectrum of euplexaurene D (9) in CDCl<sub>3</sub>

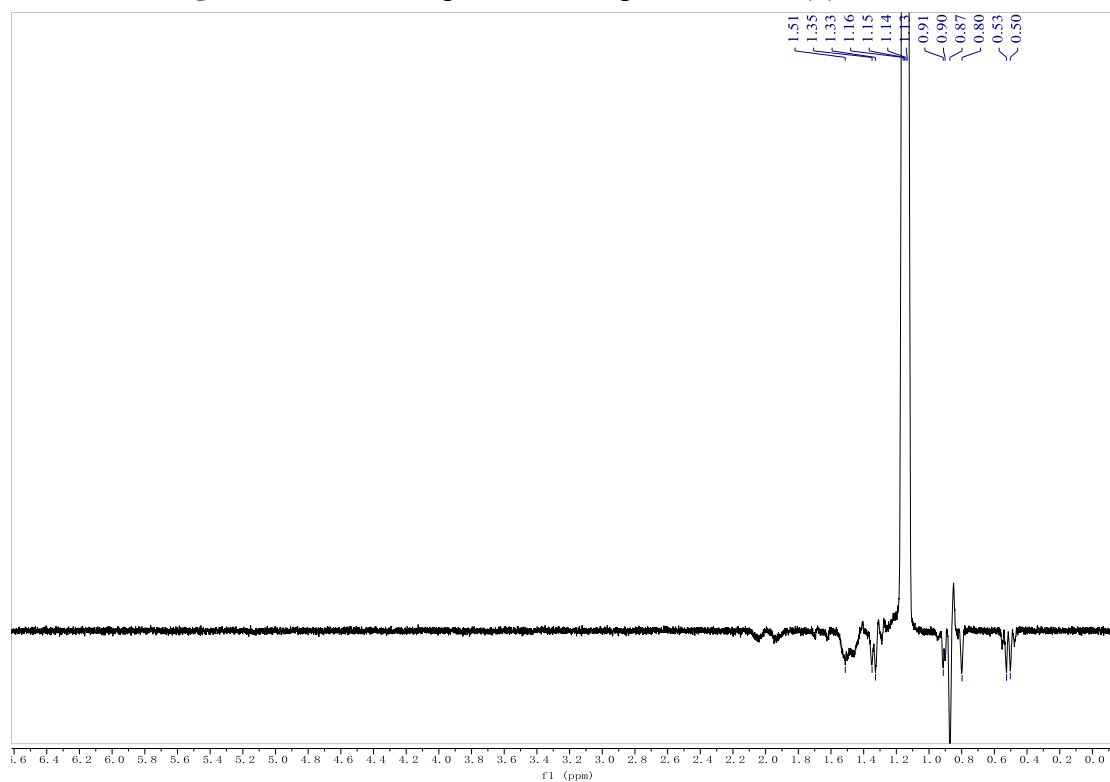

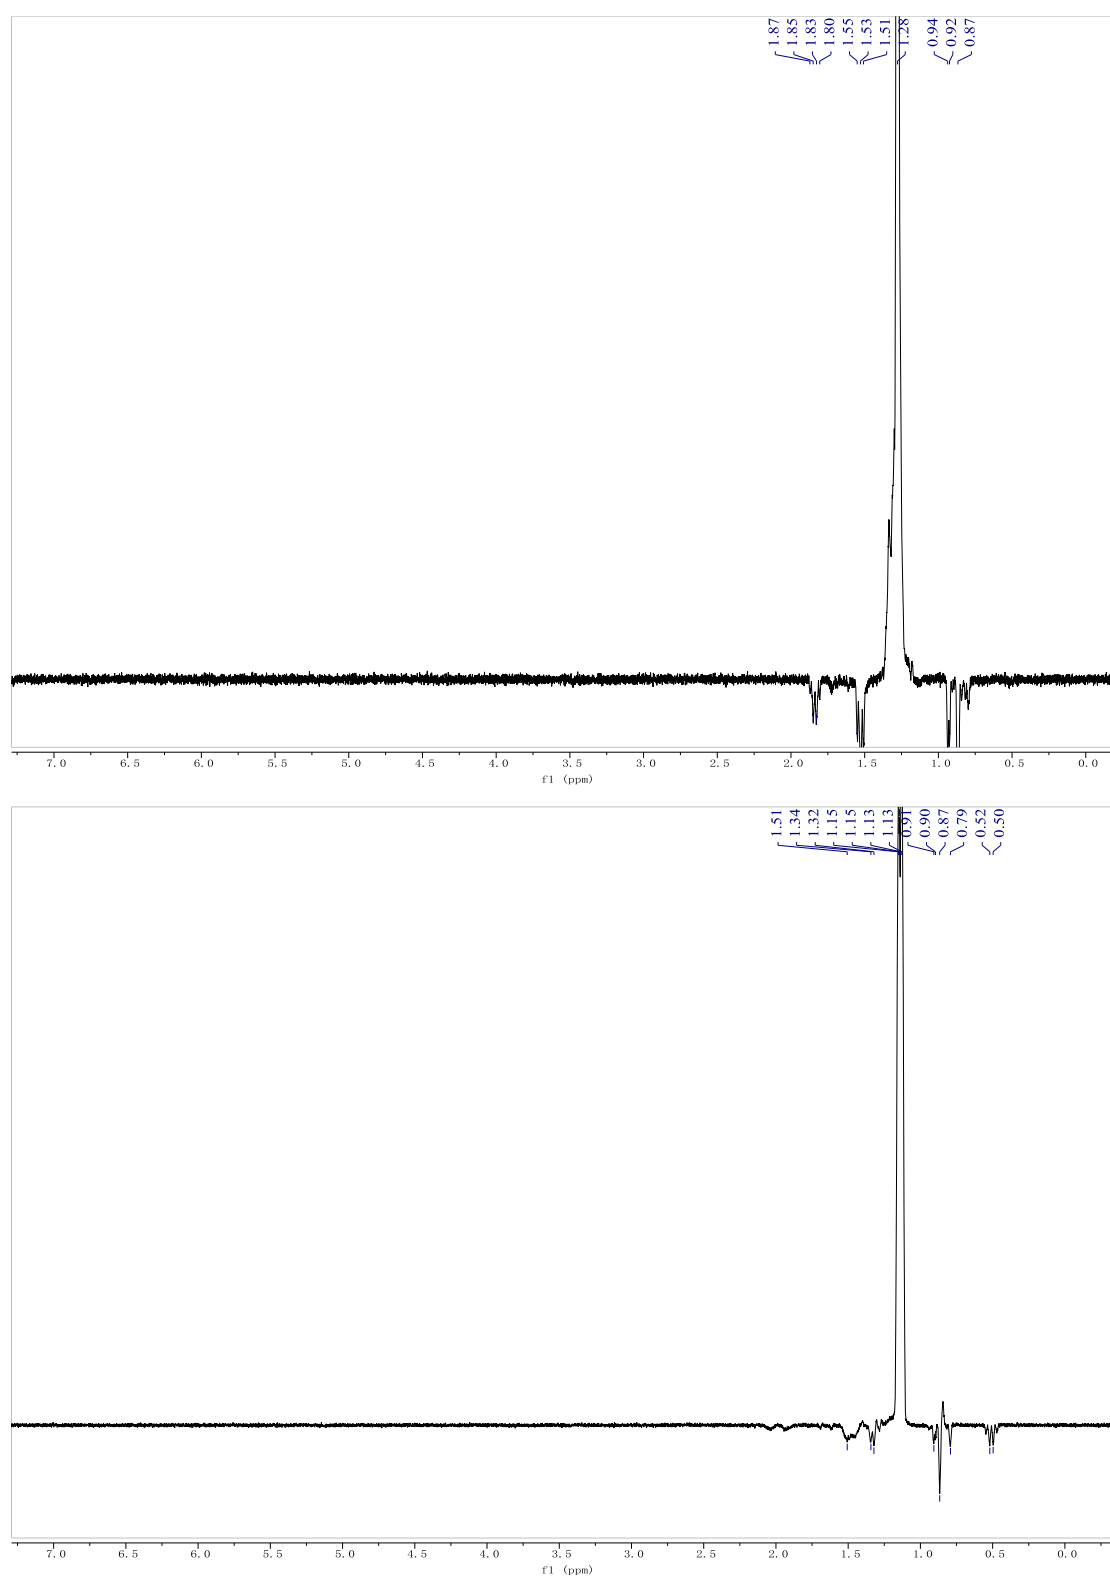

**Figure S75.** NOESY spectrum of euplexaurene D (9) in  $\text{CDCl}_3$

#### 14. Spectroscopic data for cneorubin K (10)

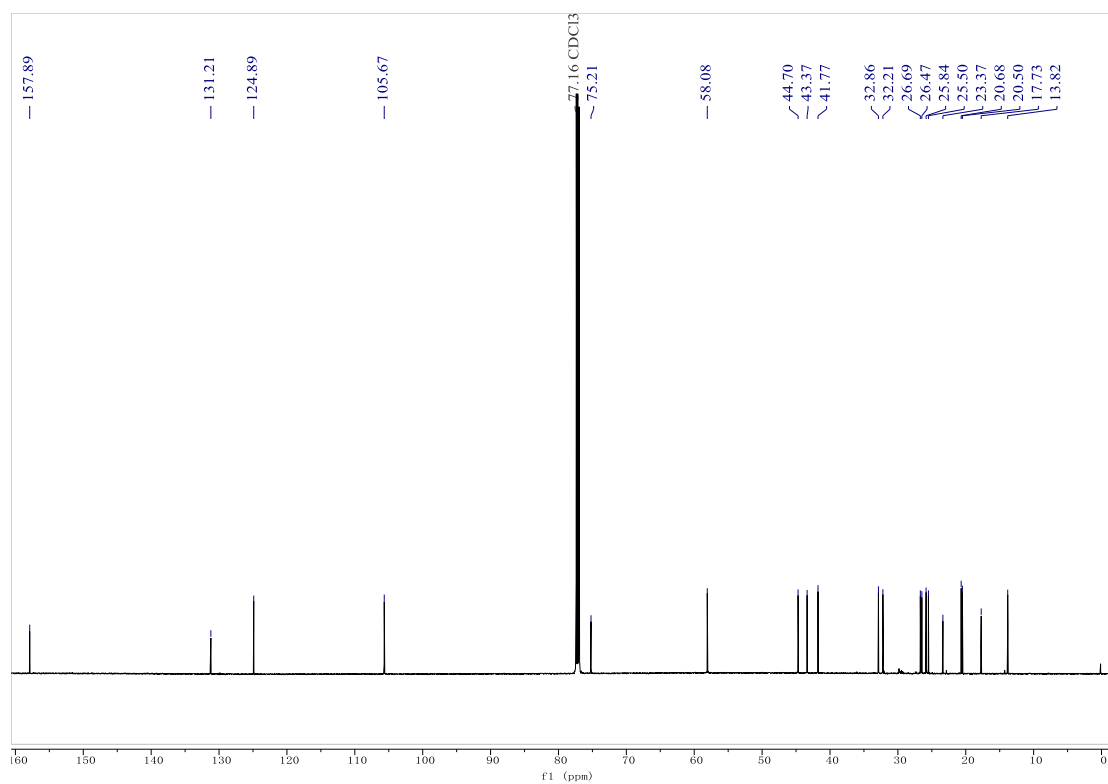

**Figure S78.** <sup>13</sup>C-NMR spectrum of cneorubin K (10) in CDCl<sub>3</sub>

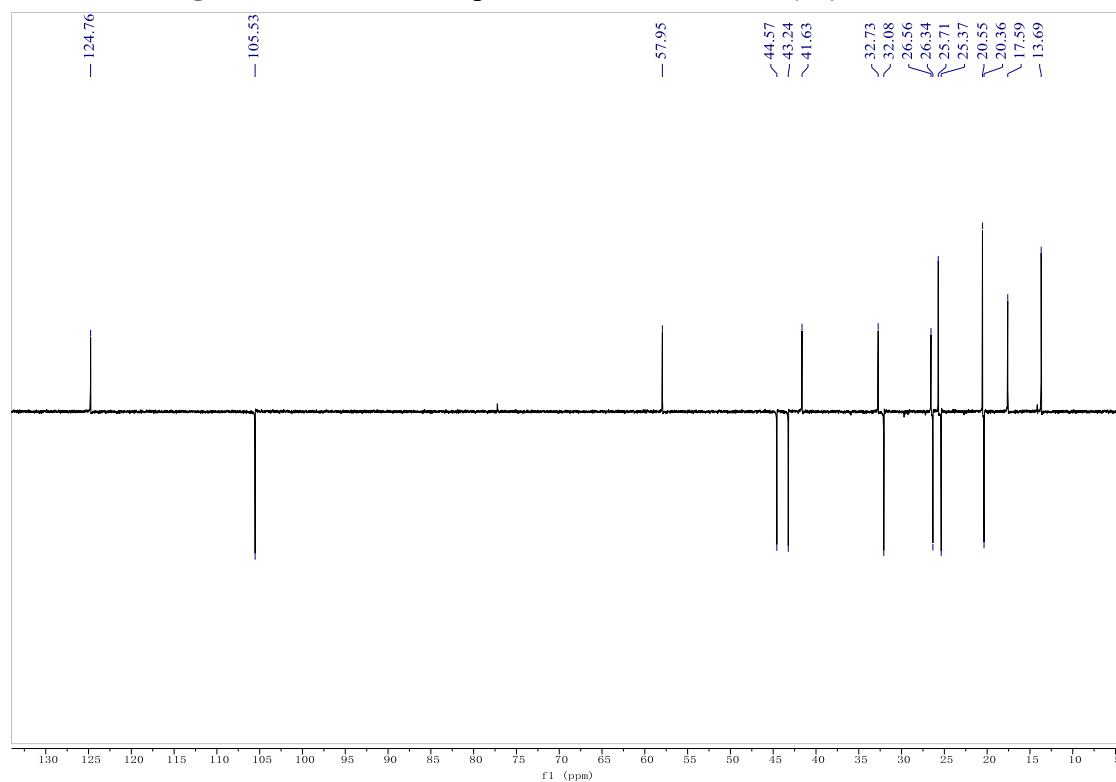

**Figure S79.** DEPT 135° spectrum of cneorubin K (10) in CDCl<sub>3</sub>

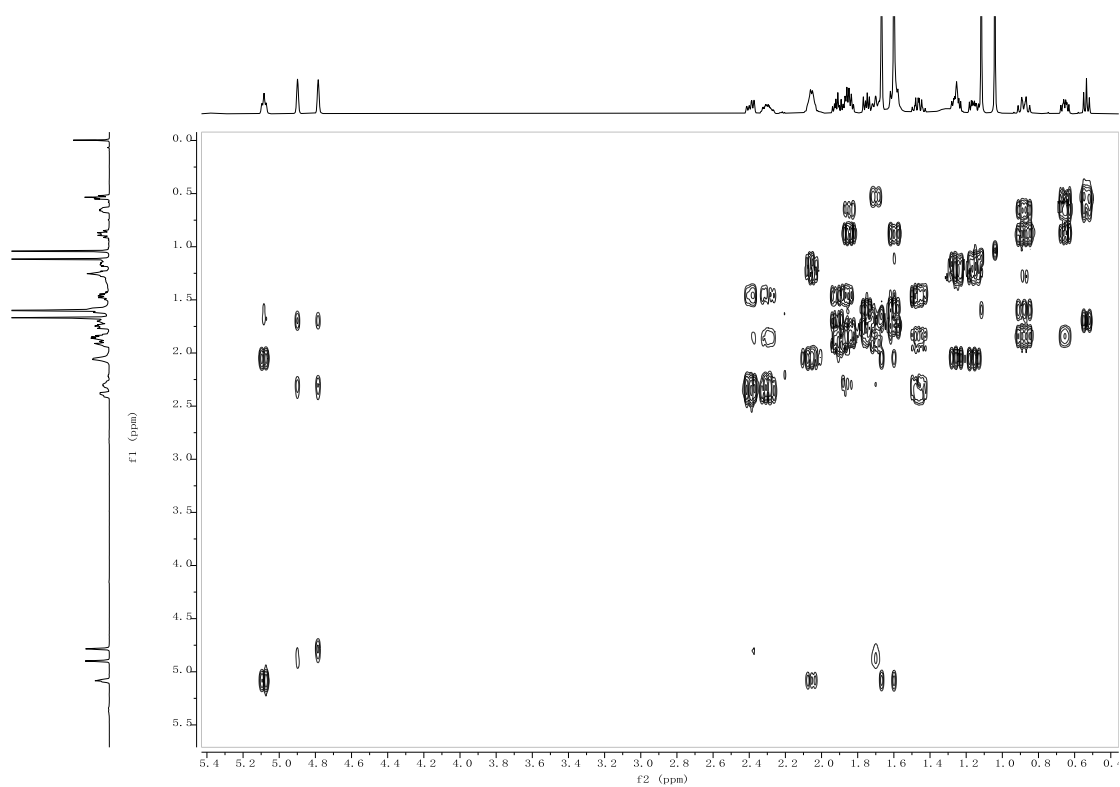

**Figure S80.**  $^1\text{H}$ - $^1\text{H}$  COSY spectrum of cneorubin K (**10**) in  $\text{CDCl}_3$

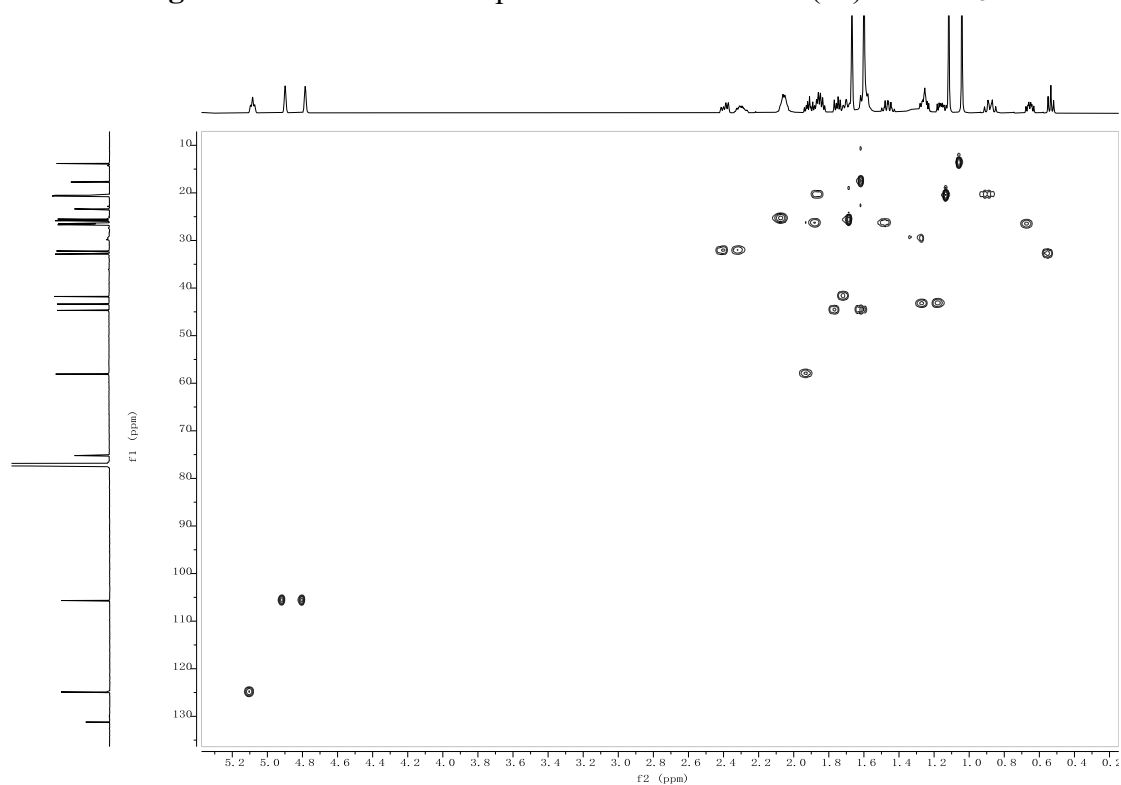

**Figure S81.** HSQC spectrum of cneorubin K (**10**) in  $\text{CDCl}_3$

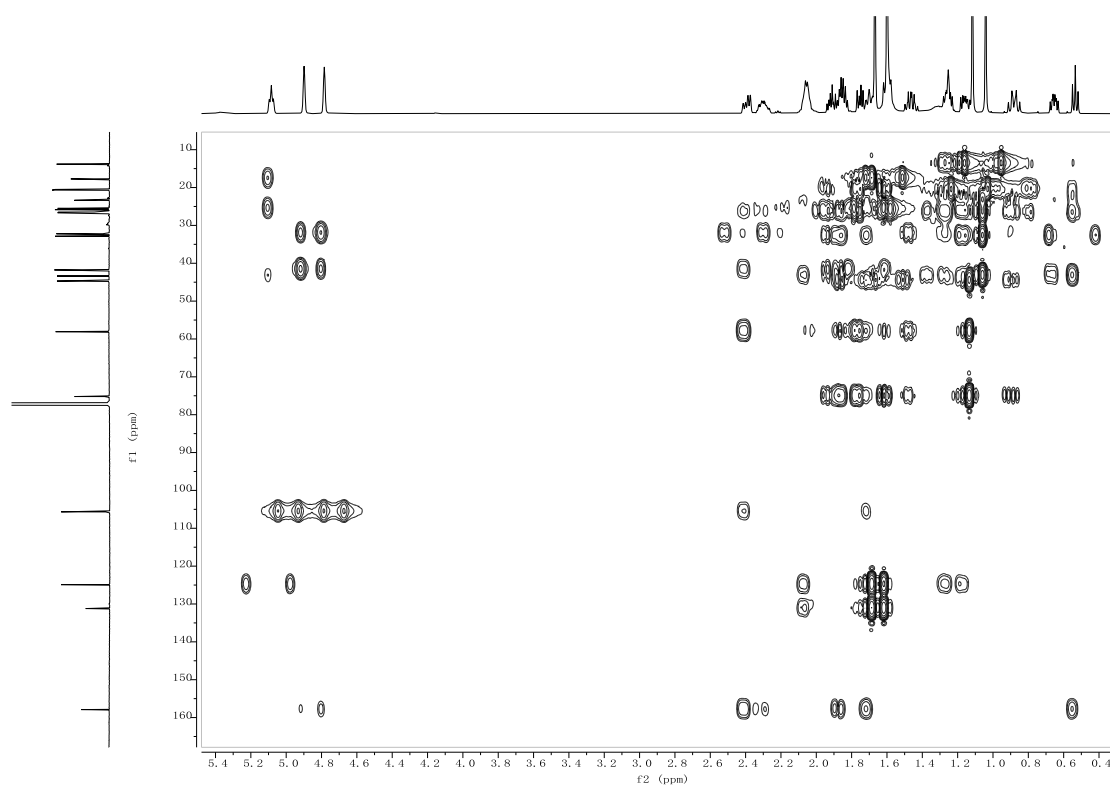

**Figure S82.** HMBC spectrum of cneorubin K (10) in  $\text{CDCl}_3$

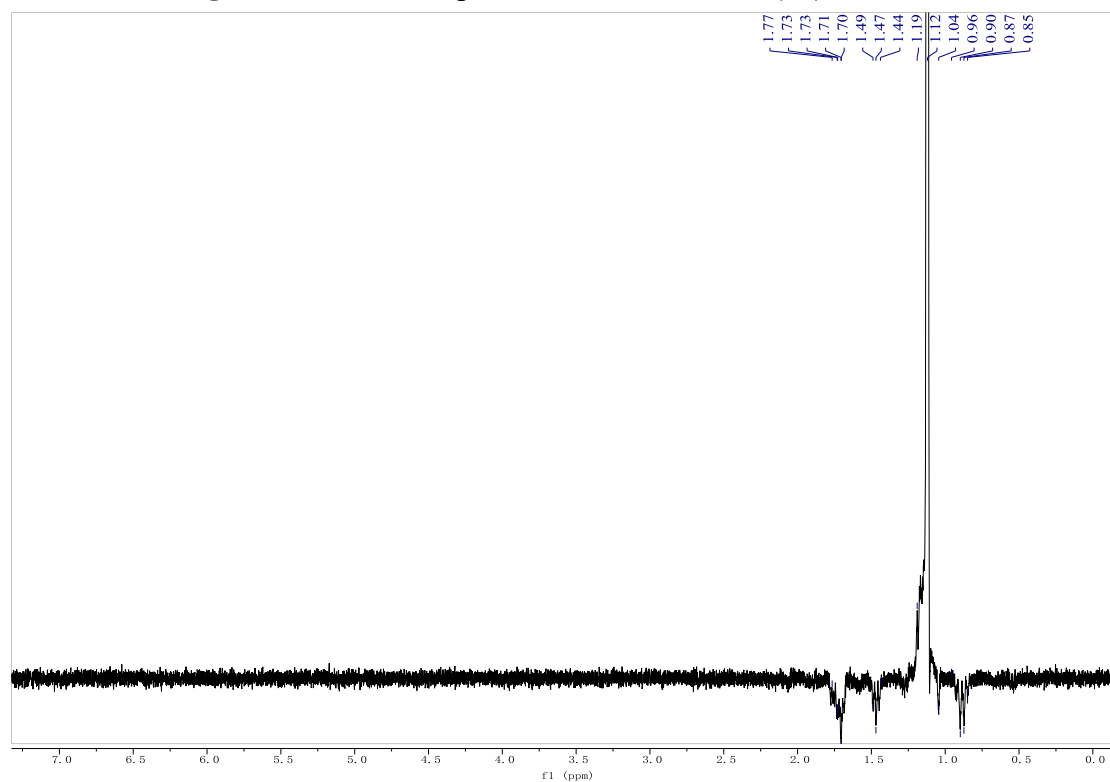

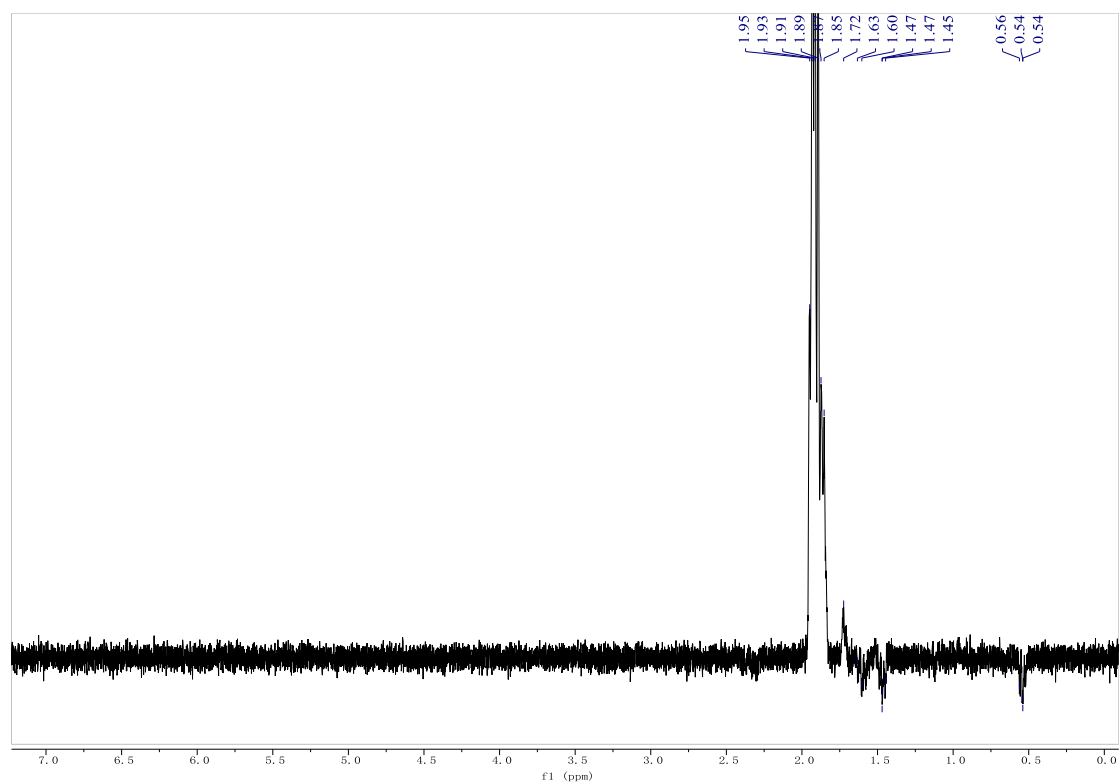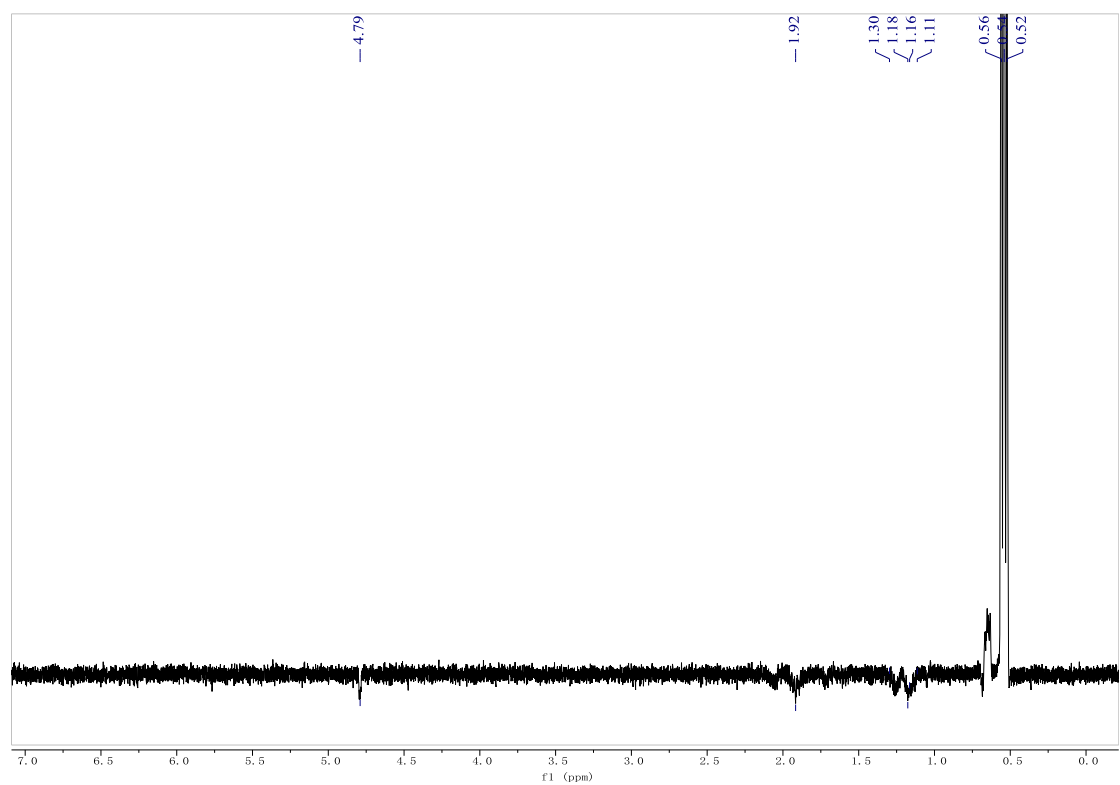



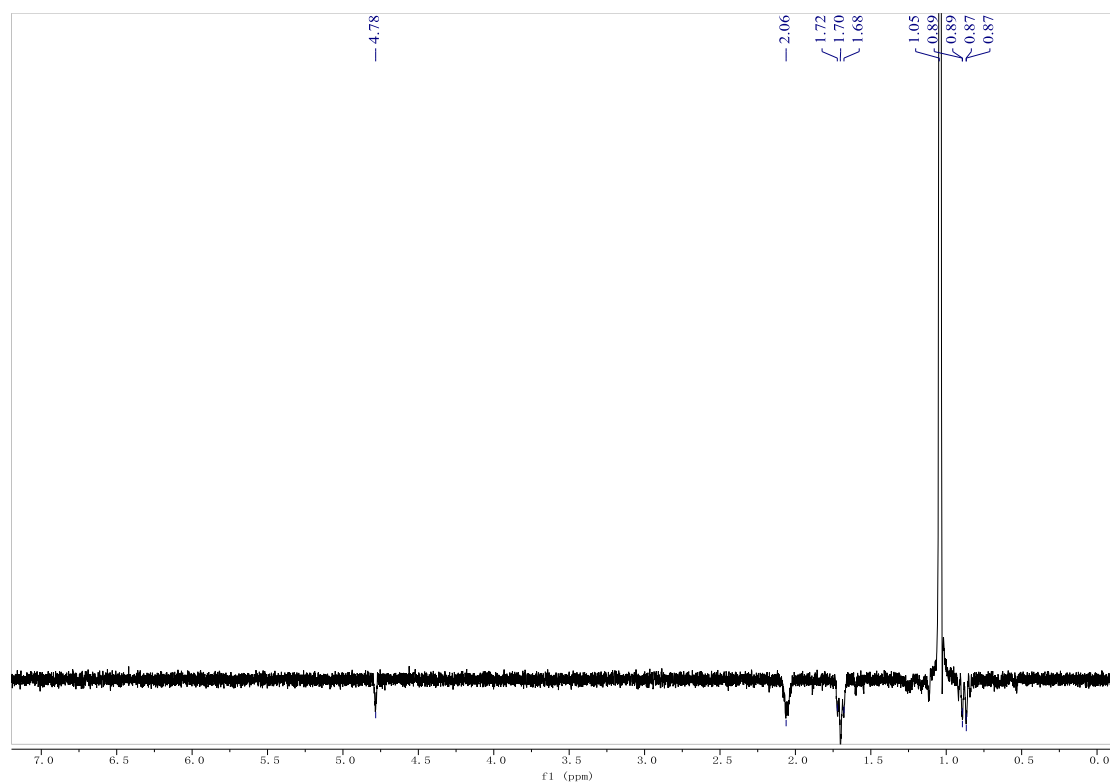

**Figure S83.** NOESY spectrum of cneorubin K (**10**) in  $\text{CDCl}_3$

**15.  $^1\text{H}$ -NMR for (*S*)-MTPA and (*R*)-MTPA esters of compound **5** in pyridine- $d_5$**

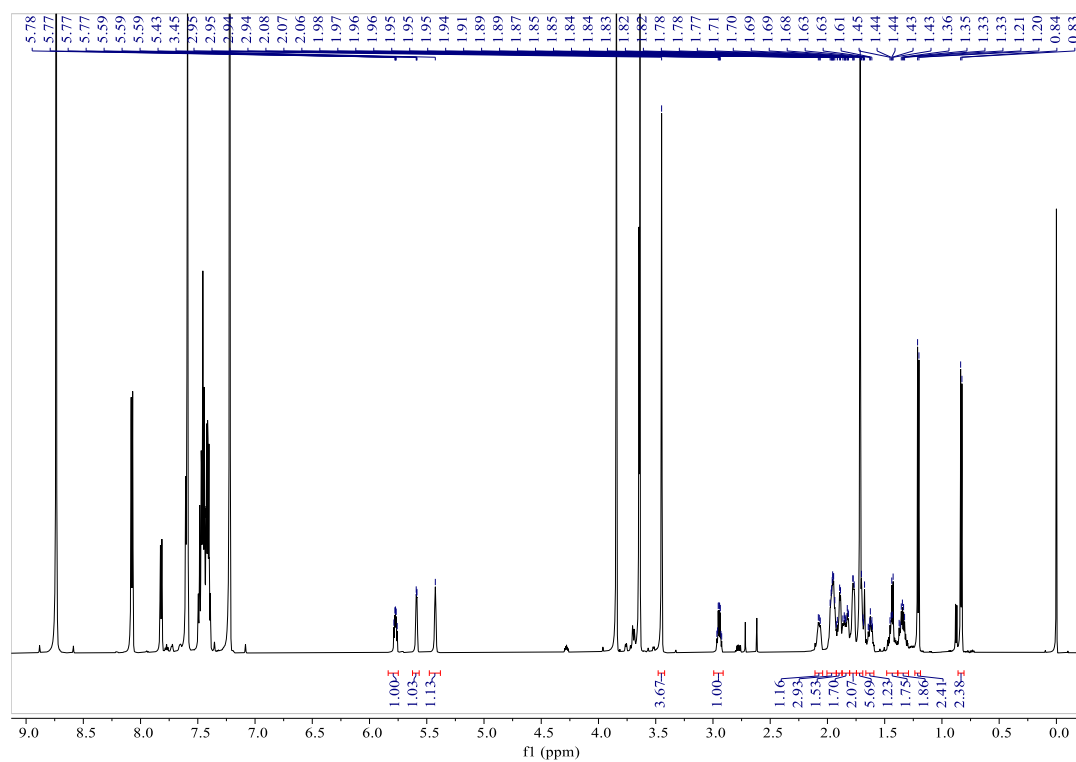

**Figure S84.**  $^1\text{H}$ -NMR for (*S*)-MTPA ester of compound **5** in pyridine- $d_5$

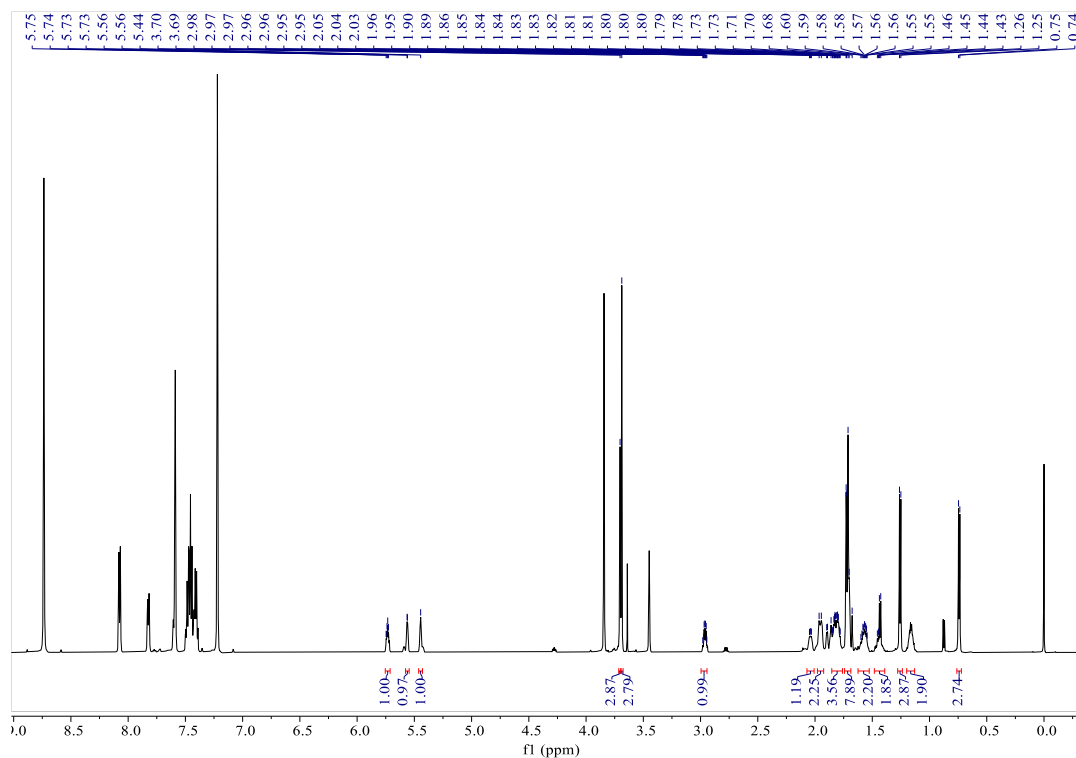

**Figure S85.**  $^1\text{H}$ -NMR for  $(R)$ -MTPA ester of compound **5** in  $\text{pyridine-}d_5$

## 16. Spectroscopic data for known compound cneurubin X (**11**)

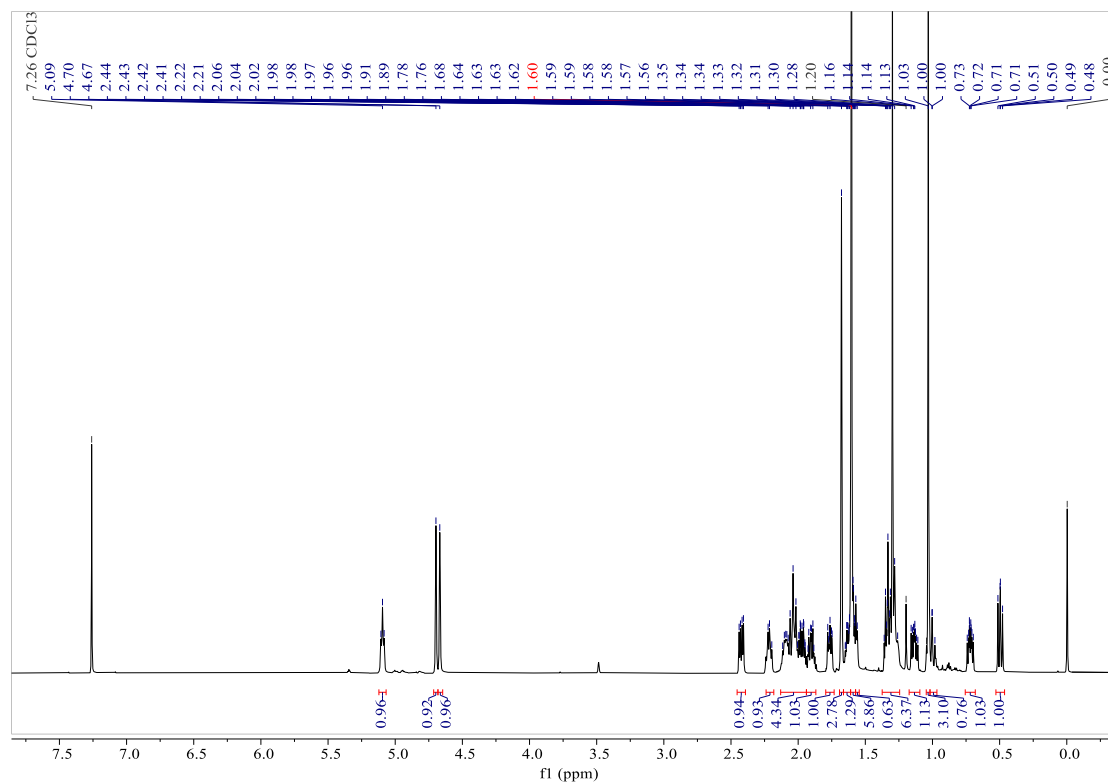

**Figure S86.**  $^1\text{H}$ -NMR spectrum of cneurubin X (**11**) in  $\text{CDCl}_3$

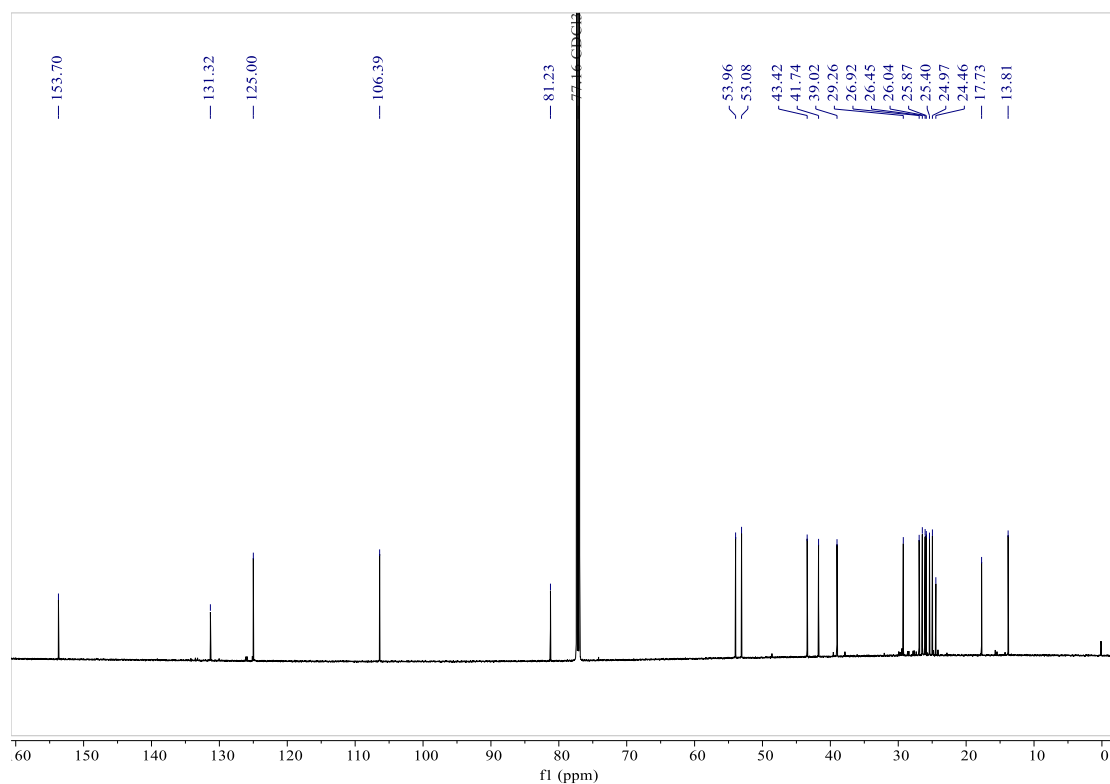

**Figure S87.**  $^{13}\text{C}$ -NMR spectrum of cneorubin X (**11**) in  $\text{CDCl}_3$

## 17. Spectroscopic data for known compound obscuronatin (**12**)

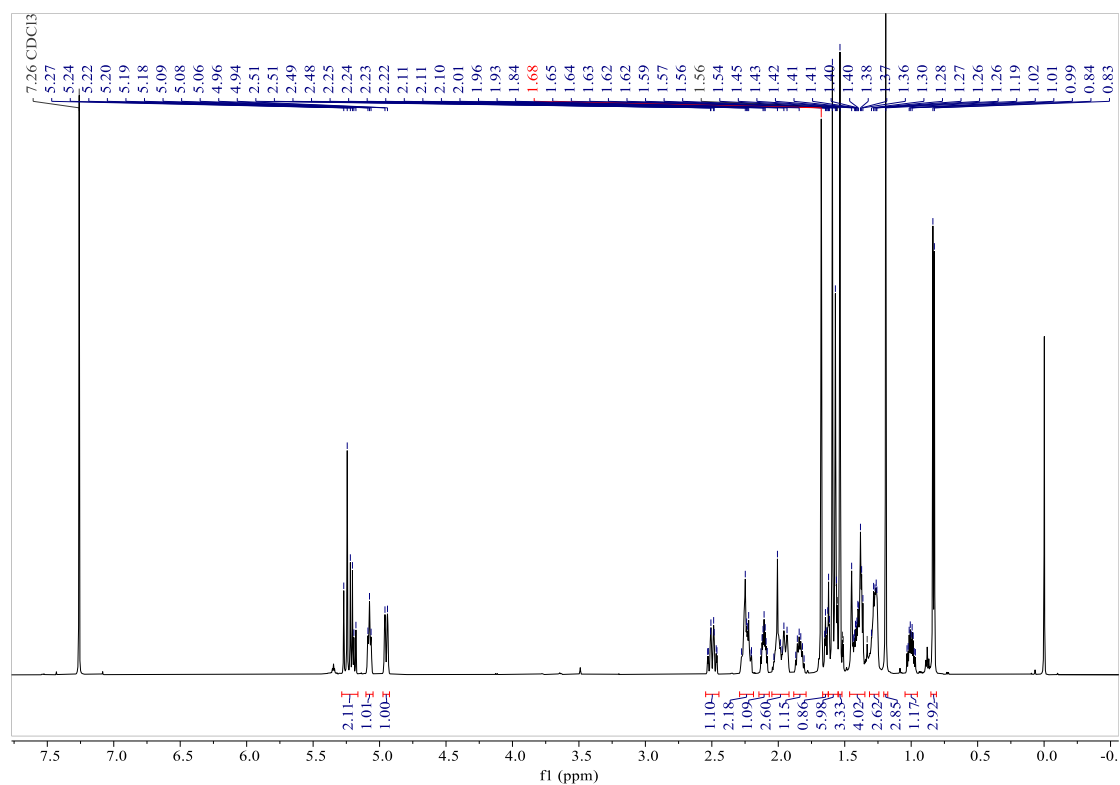

**Figure S88.**  $^1\text{H}$ -NMR spectrum of obscuronatin (**12**) in  $\text{CDCl}_3$

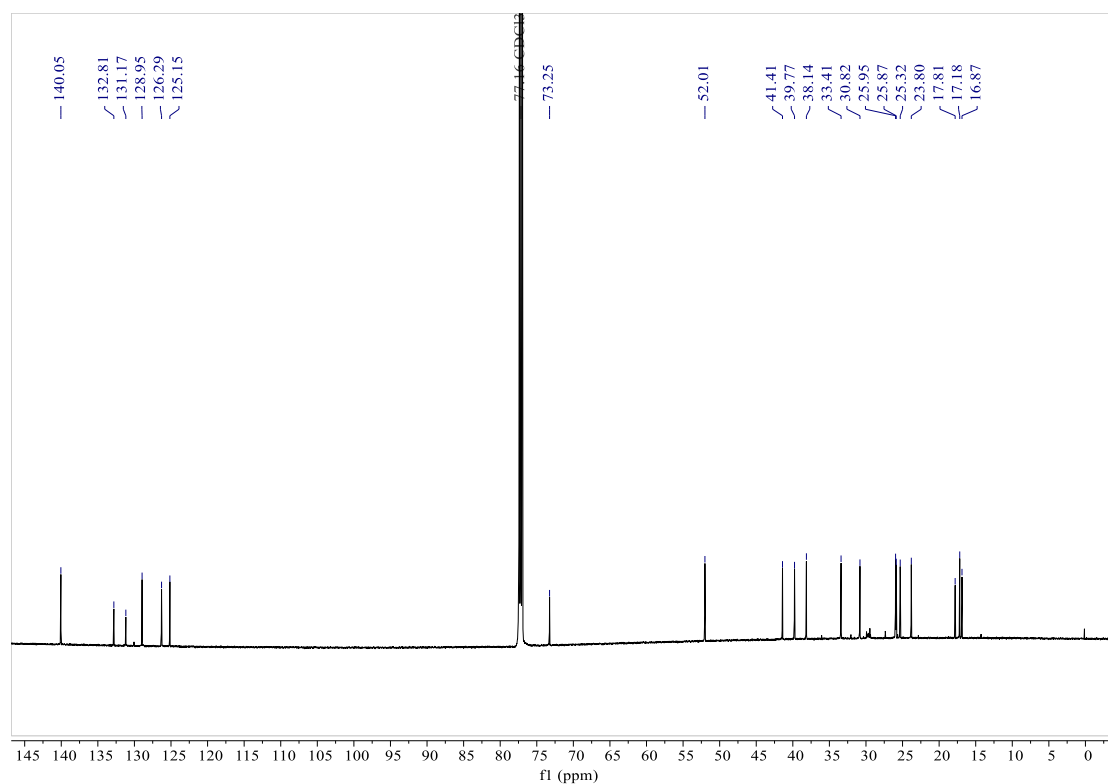

**Figure S89.** <sup>13</sup>C-NMR spectrum of obscuronatin (**12**) in CDCl<sub>3</sub>

## 18. Spectroscopic data for known compound dictyotin B (**13**)

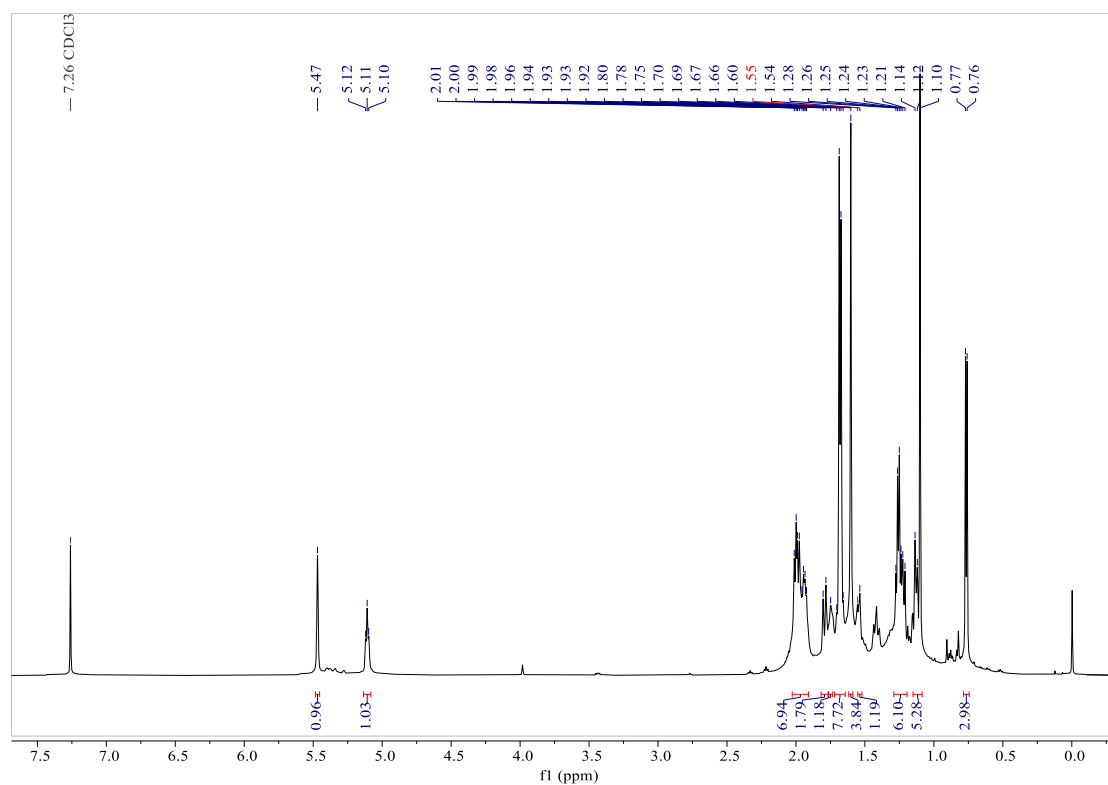

**Figure S90.** <sup>1</sup>H-NMR spectrum of dictyotin B (**13**) in CDCl<sub>3</sub>

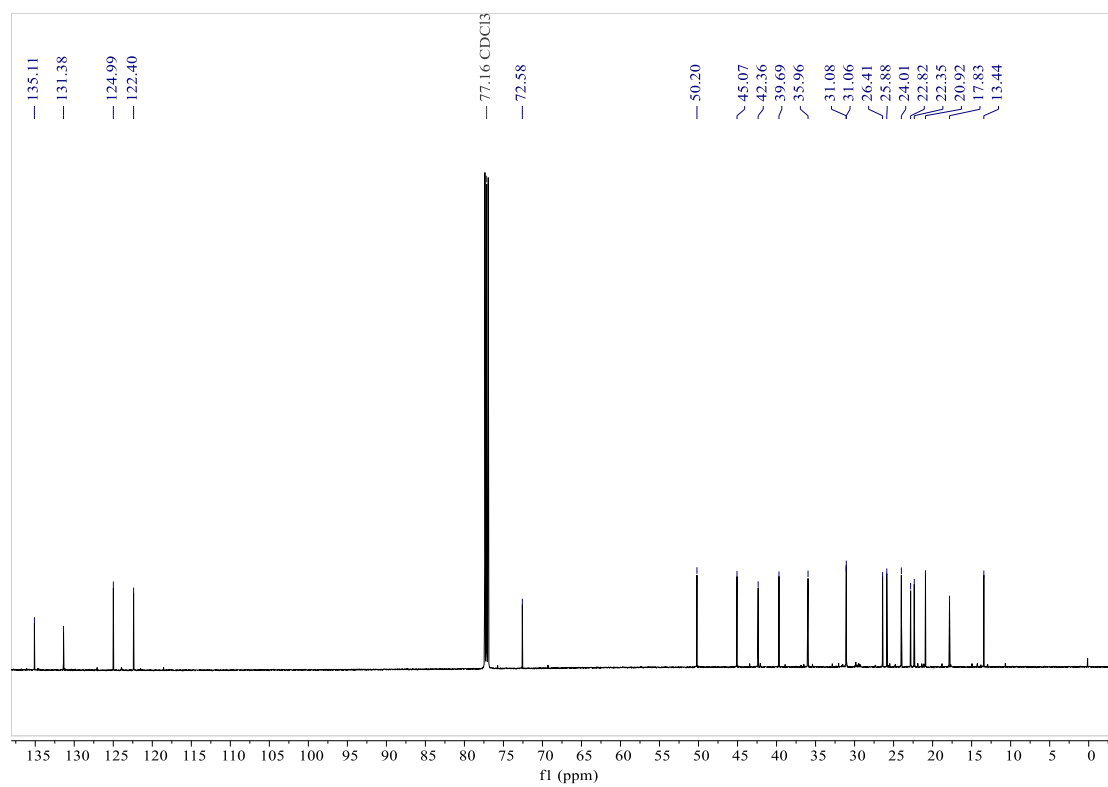

**Figure S91.** <sup>13</sup>C-NMR spectrum of dictyotin B (**13**) in CDCl<sub>3</sub>
